# Supplementary material
Source: publisher figshare collection journal article supplement (https://acs.figshare.com/ndownloader/files/12000626)
Supplement: Supplementary file 1 [file 12000626]

TITLE     MOL
REMARK    THIS IS A SIMULATION BOX
CRYST1  500.000  500.000  500.000  90.00  90.00  90.00 P 1           1
MODEL        1
ATOM      1  CS  MOL     1     212.380 302.280 155.930  1.00  0.00            
ATOM      2  CW  MOL     1     211.930 302.900 157.330  1.00  0.00            
ATOM      3  NA  MOL     1     210.590 303.480 157.130  1.00  0.00            
ATOM      4  CW  MOL     1     210.150 303.260 155.750  1.00  0.00            
ATOM      5  CS  MOL     1     211.260 302.420 155.020  1.00  0.00            
ATOM      6  CM  MOL     1     209.040 303.740 155.130  1.00  0.00            
ATOM      7  CW  MOL     1     207.980 304.490 155.700  1.00  0.00            
ATOM      8  CS  MOL     1     206.790 305.070 154.910  1.00  0.00            
ATOM      9  CS  MOL     1     205.880 305.710 155.880  1.00  0.00            
ATOM     10  CW  MOL     1     206.520 305.560 157.270  1.00  0.00            
ATOM     11  NA  MOL     1     207.830 304.830 157.080  1.00  0.00            
ATOM     12  CM  MOL     1     205.990 305.980 158.450  1.00  0.00            
ATOM     13  CW  MOL     1     206.590 305.790 159.700  1.00  0.00            
ATOM     14  CS  MOL     1     206.130 306.250 161.060  1.00  0.00            
ATOM     15  CS  MOL     1     207.210 305.810 162.030  1.00  0.00            
ATOM     16  CW  MOL     1     208.270 305.090 161.190  1.00  0.00            
ATOM     17  NA  MOL     1     207.920 305.110 159.810  1.00  0.00            
ATOM     18  CM  MOL     1     209.470 304.640 162.010  1.00  0.00            
ATOM     19  CT  MOL     1     209.100 305.040 163.570  1.00  0.00            
ATOM     20  C_2 MOL     1     207.650 305.830 163.520  1.00  0.00            
ATOM     21  CW  MOL     1     210.610 304.180 161.480  1.00  0.00            
ATOM     22  NA  MOL     1     210.850 303.930 160.020  1.00  0.00            
ATOM     23  CW  MOL     1     212.160 303.460 159.760  1.00  0.00            
ATOM     24  CT  MOL     1     212.990 303.480 161.120  1.00  0.00            
ATOM     25  CT  MOL     1     211.920 303.900 162.300  1.00  0.00            
ATOM     26  CM  MOL     1     212.660 302.950 158.540  1.00  0.00            
ATOM     27  MG  MOL     1     209.420 304.530 158.480  1.00  0.00            
ATOM     28  CT  MOL     1     213.660 301.620 155.550  1.00  0.00            
ATOM     29  HC  MOL     1     214.540 302.270 155.690  1.00  0.00            
ATOM     30  HC  MOL     1     213.770 300.670 156.030  1.00  0.00            
ATOM     31  HC  MOL     1     213.650 301.430 154.470  1.00  0.00            
ATOM     32  CT  MOL     1     211.090 301.920 153.600  1.00  0.00            
ATOM     33  OH  MOL     1     211.450 300.540 153.530  1.00  0.00            
ATOM     34  HO  MOL     1     211.300 300.240 152.630  1.00  0.00            
ATOM     35  CT  MOL     1     211.770 302.790 152.540  1.00  0.00            
ATOM     36  HC  MOL     1     212.870 302.780 152.650  1.00  0.00            
ATOM     37  HC  MOL     1     211.450 303.820 152.590  1.00  0.00            
ATOM     38  HC  MOL     1     211.540 302.460 151.540  1.00  0.00            
ATOM     39  HC  MOL     1     210.060 301.950 153.400  1.00  0.00            
ATOM     40  HC  MOL     1     208.910 303.620 154.090  1.00  0.00            
ATOM     41  CT  MOL     1     204.610 306.450 155.640  1.00  0.00            
ATOM     42  CT  MOL     1     203.360 305.610 155.930  1.00  0.00            
ATOM     43  HC  MOL     1     203.400 304.680 155.370  1.00  0.00            
ATOM     44  HC  MOL     1     202.480 306.220 155.640  1.00  0.00            
ATOM     45  HC  MOL     1     203.240 305.330 156.980  1.00  0.00            
ATOM     46  HC  MOL     1     204.580 306.770 154.590  1.00  0.00            
ATOM     47  HC  MOL     1     204.590 307.340 156.240  1.00  0.00            
ATOM     48  HC  MOL     1     205.020 306.460 158.390  1.00  0.00            
ATOM     49  CT  MOL     1     204.950 307.110 161.420  1.00  0.00            
ATOM     50  CT  MOL     1     203.760 306.280 161.850  1.00  0.00            
ATOM     51  HC  MOL     1     203.490 305.550 161.090  1.00  0.00            
ATOM     52  HC  MOL     1     202.880 306.890 162.000  1.00  0.00            
ATOM     53  HC  MOL     1     203.980 305.810 162.800  1.00  0.00            
ATOM     54  HC  MOL     1     204.700 307.700 160.540  1.00  0.00            
ATOM     55  HC  MOL     1     205.160 307.820 162.200  1.00  0.00            
ATOM     56  O_2 MOL     1     207.180 306.340 164.490  1.00  0.00            
ATOM     57  HC  MOL     1     209.020 304.240 164.270  1.00  0.00            
ATOM     58  HC  MOL     1     209.860 305.720 163.940  1.00  0.00            
ATOM     59  CT  MOL     1     214.110 304.560 161.060  1.00  0.00            
ATOM     60  HC  MOL     1     214.880 304.320 160.330  1.00  0.00            
ATOM     61  HC  MOL     1     213.740 305.540 160.820  1.00  0.00            
ATOM     62  HC  MOL     1     214.570 304.570 162.040  1.00  0.00            
ATOM     63  HC  MOL     1     213.440 302.510 161.320  1.00  0.00            
ATOM     64  CT  MOL     1     206.670 305.010 153.420  1.00  0.00            
ATOM     65  HC  MOL     1     205.640 304.920 153.080  1.00  0.00            
ATOM     66  HC  MOL     1     207.090 305.920 152.970  1.00  0.00            
ATOM     67  HC  MOL     1     207.200 304.180 153.030  1.00  0.00            
ATOM     68  CT  MOL     1     214.110 302.410 158.510  1.00  0.00            
ATOM     69  HC  MOL     1     214.760 303.090 157.980  1.00  0.00            
ATOM     70  HC  MOL     1     214.190 301.390 158.090  1.00  0.00            
ATOM     71  HC  MOL     1     214.580 302.250 159.470  1.00  0.00            
ATOM     72  HC  MOL     1     212.230 304.810 162.790  1.00  0.00            
ATOM     73  CT  MOL     1     211.750 302.810 163.410  1.00  0.00            
ATOM     74  CT  MOL     1     212.860 302.800 164.500  1.00  0.00            
ATOM     75  HC  MOL     1     211.600 301.820 162.990  1.00  0.00            
ATOM     76  HC  MOL     1     210.890 303.040 164.010  1.00  0.00            
ATOM     77  HC  MOL     1     213.010 303.800 164.900  1.00  0.00            
ATOM     78  HC  MOL     1     212.510 302.200 165.300  1.00  0.00            
ATOM     79  C_2 MOL     1     214.160 302.160 164.080  1.00  0.00            
ATOM     80  OS  MOL     1     215.230 302.870 164.400  1.00  0.00            
ATOM     81  O_2 MOL     1     214.220 301.190 163.380  1.00  0.00            
ATOM     82  CT  MOL     1     216.510 302.340 164.050  1.00  0.00            
ATOM     83  CM  MOL     1     217.510 303.420 164.280  1.00  0.00            
ATOM     84  CM  MOL     1     218.490 303.870 163.480  1.00  0.00            
ATOM     85  CT  MOL     1     219.440 304.960 163.960  1.00  0.00            
ATOM     86  HC  MOL     1     216.520 301.930 163.040  1.00  0.00            
ATOM     87  HC  MOL     1     216.730 301.550 164.760  1.00  0.00            
ATOM     88  HC  MOL     1     217.470 303.850 165.270  1.00  0.00            
ATOM     89  HC  MOL     1     219.500 305.750 163.230  1.00  0.00            
ATOM     90  HC  MOL     1     218.990 305.420 164.830  1.00  0.00            
ATOM     91  CT  MOL     1     218.740 303.430 162.040  1.00  0.00            
ATOM     92  HC  MOL     1     218.160 302.590 161.680  1.00  0.00            
ATOM     93  HC  MOL     1     219.770 303.210 161.890  1.00  0.00            
ATOM     94  HC  MOL     1     218.460 304.240 161.380  1.00  0.00            
ATOM     95  CT  MOL     1     220.870 304.460 164.340  1.00  0.00            
ATOM     96  CM  MOL     1     221.740 305.550 164.920  1.00  0.00            
ATOM     97  CM  MOL     1     222.910 306.020 164.510  1.00  0.00            
ATOM     98  CT  MOL     1     223.610 307.100 165.330  1.00  0.00            
ATOM     99  HC  MOL     1     220.730 303.670 165.070  1.00  0.00            
ATOM    100  HC  MOL     1     221.320 304.010 163.460  1.00  0.00            
ATOM    101  HC  MOL     1     221.270 305.930 165.830  1.00  0.00            
ATOM    102  HC  MOL     1     222.920 307.470 166.070  1.00  0.00            
ATOM    103  HC  MOL     1     223.840 307.980 164.750  1.00  0.00            
ATOM    104  CT  MOL     1     223.660 305.590 163.260  1.00  0.00            
ATOM    105  HC  MOL     1     223.110 304.950 162.610  1.00  0.00            
ATOM    106  HC  MOL     1     224.580 305.060 163.510  1.00  0.00            
ATOM    107  HC  MOL     1     223.970 306.440 162.650  1.00  0.00            
ATOM    108  CT  MOL     1     224.900 306.650 166.070  1.00  0.00            
ATOM    109  CM  MOL     1     225.380 307.730 167.040  1.00  0.00            
ATOM    110  CM  MOL     1     226.460 308.510 167.010  1.00  0.00            
ATOM    111  CT  MOL     1     226.650 309.580 168.080  1.00  0.00            
ATOM    112  HC  MOL     1     224.800 305.740 166.650  1.00  0.00            
ATOM    113  HC  MOL     1     225.640 306.440 165.320  1.00  0.00            
ATOM    114  HC  MOL     1     224.640 307.850 167.810  1.00  0.00            
ATOM    115  HC  MOL     1     227.610 309.450 168.600  1.00  0.00            
ATOM    116  HC  MOL     1     225.840 309.570 168.840  1.00  0.00            
ATOM    117  HC  MOL     1     226.680 310.530 167.610  1.00  0.00            
ATOM    118  CT  MOL     1     227.520 308.510 165.960  1.00  0.00            
ATOM    119  HC  MOL     1     227.360 307.900 165.100  1.00  0.00            
ATOM    120  HC  MOL     1     228.470 308.180 166.390  1.00  0.00            
ATOM    121  HC  MOL     1     227.680 309.520 165.540  1.00  0.00            
ATOM    122  CS  MOL     2     208.280 308.960 159.580  1.00  0.00            
ATOM    123  CW  MOL     2     207.430 309.600 160.780  1.00  0.00            
ATOM    124  NA  MOL     2     208.200 309.390 162.010  1.00  0.00            
ATOM    125  CW  MOL     2     209.420 308.590 161.690  1.00  0.00            
ATOM    126  CS  MOL     2     209.430 308.310 160.160  1.00  0.00            
ATOM    127  CM  MOL     2     210.370 308.210 162.550  1.00  0.00            
ATOM    128  CW  MOL     2     210.470 308.520 163.950  1.00  0.00            
ATOM    129  CS  MOL     2     211.640 308.050 164.840  1.00  0.00            
ATOM    130  CS  MOL     2     211.380 308.490 166.200  1.00  0.00            
ATOM    131  CW  MOL     2     210.070 309.250 166.190  1.00  0.00            
ATOM    132  NA  MOL     2     209.530 309.250 164.760  1.00  0.00            
ATOM    133  CM  MOL     2     209.430 309.820 167.250  1.00  0.00            
ATOM    134  CW  MOL     2     208.210 310.460 167.200  1.00  0.00            
ATOM    135  CS  MOL     2     207.340 311.010 168.280  1.00  0.00            
ATOM    136  CS  MOL     2     206.070 311.500 167.660  1.00  0.00            
ATOM    137  CW  MOL     2     206.200 311.200 166.150  1.00  0.00            
ATOM    138  NA  MOL     2     207.480 310.610 165.880  1.00  0.00            
ATOM    139  CM  MOL     2     204.990 311.670 165.380  1.00  0.00            
ATOM    140  CT  MOL     2     203.980 312.310 166.480  1.00  0.00            
ATOM    141  C_2 MOL     2     204.670 312.080 167.970  1.00  0.00            
ATOM    142  CW  MOL     2     204.860 311.510 164.070  1.00  0.00            
ATOM    143  NA  MOL     2     205.830 310.780 163.210  1.00  0.00            
ATOM    144  CW  MOL     2     205.410 310.680 161.870  1.00  0.00            
ATOM    145  CT  MOL     2     203.910 311.270 161.710  1.00  0.00            
ATOM    146  CT  MOL     2     203.610 311.950 163.180  1.00  0.00            
ATOM    147  CM  MOL     2     206.160 310.180 160.720  1.00  0.00            
ATOM    148  MG  MOL     2     207.670 309.850 163.950  1.00  0.00            
ATOM    149  CT  MOL     2     208.020 309.000 158.100  1.00  0.00            
ATOM    150  HC  MOL     2     207.100 308.490 157.790  1.00  0.00            
ATOM    151  HC  MOL     2     207.930 310.050 157.770  1.00  0.00            
ATOM    152  HC  MOL     2     208.800 308.580 157.540  1.00  0.00            
ATOM    153  CT  MOL     2     210.520 307.530 159.410  1.00  0.00            
ATOM    154  OH  MOL     2     209.990 306.650 158.450  1.00  0.00            
ATOM    155  HO  MOL     2     209.250 307.110 158.100  1.00  0.00            
ATOM    156  CT  MOL     2     211.640 308.400 158.820  1.00  0.00            
ATOM    157  HC  MOL     2     211.330 309.040 158.000  1.00  0.00            
ATOM    158  HC  MOL     2     212.450 307.750 158.480  1.00  0.00            
ATOM    159  HC  MOL     2     212.110 309.060 159.590  1.00  0.00            
ATOM    160  HC  MOL     2     210.980 306.920 160.150  1.00  0.00            
ATOM    161  HC  MOL     2     211.220 307.670 162.180  1.00  0.00            
ATOM    162  CT  MOL     2     212.150 308.150 167.450  1.00  0.00            
ATOM    163  CT  MOL     2     211.550 306.960 168.200  1.00  0.00            
ATOM    164  HC  MOL     2     211.520 306.040 167.630  1.00  0.00            
ATOM    165  HC  MOL     2     210.540 307.190 168.540  1.00  0.00            
ATOM    166  HC  MOL     2     212.120 306.760 169.110  1.00  0.00            
ATOM    167  HC  MOL     2     213.160 307.890 167.170  1.00  0.00            
ATOM    168  HC  MOL     2     212.210 309.060 168.040  1.00  0.00            
ATOM    169  HC  MOL     2     209.880 309.730 168.210  1.00  0.00            
ATOM    170  CT  MOL     2     207.650 311.010 169.790  1.00  0.00            
ATOM    171  CT  MOL     2     208.680 312.080 170.180  1.00  0.00            
ATOM    172  HC  MOL     2     208.290 313.080 169.960  1.00  0.00            
ATOM    173  HC  MOL     2     209.620 311.940 169.640  1.00  0.00            
ATOM    174  HC  MOL     2     208.830 312.010 171.230  1.00  0.00            
ATOM    175  HC  MOL     2     208.040 310.020 170.030  1.00  0.00            
ATOM    176  HC  MOL     2     206.750 311.120 170.360  1.00  0.00            
ATOM    177  O_2 MOL     2     204.080 312.220 168.970  1.00  0.00            
ATOM    178  HC  MOL     2     203.800 313.370 166.340  1.00  0.00            
ATOM    179  HC  MOL     2     203.000 311.850 166.430  1.00  0.00            
ATOM    180  CT  MOL     2     202.880 310.150 161.540  1.00  0.00            
ATOM    181  HC  MOL     2     203.010 309.620 160.610  1.00  0.00            
ATOM    182  HC  MOL     2     203.020 309.440 162.350  1.00  0.00            
ATOM    183  HC  MOL     2     201.870 310.570 161.570  1.00  0.00            
ATOM    184  HC  MOL     2     203.830 312.000 160.950  1.00  0.00            
ATOM    185  CT  MOL     2     212.790 307.220 164.350  1.00  0.00            
ATOM    186  HC  MOL     2     212.620 306.170 164.560  1.00  0.00            
ATOM    187  HC  MOL     2     213.010 307.300 163.270  1.00  0.00            
ATOM    188  HC  MOL     2     213.750 307.470 164.820  1.00  0.00            
ATOM    189  CT  MOL     2     205.440 310.280 159.350  1.00  0.00            
ATOM    190  HC  MOL     2     206.090 310.780 158.640  1.00  0.00            
ATOM    191  HC  MOL     2     204.490 310.810 159.250  1.00  0.00            
ATOM    192  HC  MOL     2     205.200 309.300 158.990  1.00  0.00            
ATOM    193  HC  MOL     2     202.730 311.520 163.660  1.00  0.00            
ATOM    194  CT  MOL     2     203.410 313.510 163.090  1.00  0.00            
ATOM    195  CT  MOL     2     202.120 314.010 162.330  1.00  0.00            
ATOM    196  HC  MOL     2     204.320 313.930 162.670  1.00  0.00            
ATOM    197  HC  MOL     2     203.340 313.860 164.120  1.00  0.00            
ATOM    198  HC  MOL     2     202.050 315.100 162.360  1.00  0.00            
ATOM    199  HC  MOL     2     202.180 313.760 161.270  1.00  0.00            
ATOM    200  C_2 MOL     2     200.780 313.490 162.840  1.00  0.00            
ATOM    201  OS  MOL     2     199.880 313.410 161.840  1.00  0.00            
ATOM    202  O_2 MOL     2     200.590 313.070 163.950  1.00  0.00            
ATOM    203  CT  MOL     2     198.530 312.900 162.000  1.00  0.00            
ATOM    204  CM  MOL     2     198.580 311.390 161.790  1.00  0.00            
ATOM    205  CM  MOL     2     198.350 310.670 160.690  1.00  0.00            
ATOM    206  CT  MOL     2     198.350 309.140 160.710  1.00  0.00            
ATOM    207  HC  MOL     2     197.870 313.440 161.380  1.00  0.00            
ATOM    208  HC  MOL     2     198.140 313.150 162.980  1.00  0.00            
ATOM    209  HC  MOL     2     198.870 310.880 162.700  1.00  0.00            
ATOM    210  HC  MOL     2     197.470 308.820 160.200  1.00  0.00            
ATOM    211  HC  MOL     2     199.160 308.720 160.150  1.00  0.00            
ATOM    212  CT  MOL     2     198.060 311.290 159.320  1.00  0.00            
ATOM    213  HC  MOL     2     198.210 312.380 159.250  1.00  0.00            
ATOM    214  HC  MOL     2     197.030 311.070 159.020  1.00  0.00            
ATOM    215  HC  MOL     2     198.670 310.810 158.550  1.00  0.00            
ATOM    216  CT  MOL     2     198.240 308.420 162.090  1.00  0.00            
ATOM    217  CM  MOL     2     197.920 306.950 161.900  1.00  0.00            
ATOM    218  CM  MOL     2     196.920 306.220 162.390  1.00  0.00            
ATOM    219  CT  MOL     2     196.790 304.750 162.040  1.00  0.00            
ATOM    220  HC  MOL     2     199.180 308.500 162.610  1.00  0.00            
ATOM    221  HC  MOL     2     197.540 308.920 162.770  1.00  0.00            
ATOM    222  HC  MOL     2     198.590 306.460 161.210  1.00  0.00            
ATOM    223  HC  MOL     2     196.720 304.130 162.950  1.00  0.00            
ATOM    224  HC  MOL     2     197.680 304.440 161.500  1.00  0.00            
ATOM    225  CT  MOL     2     195.850 306.710 163.360  1.00  0.00            
ATOM    226  HC  MOL     2     196.100 307.610 163.840  1.00  0.00            
ATOM    227  HC  MOL     2     195.660 306.000 164.140  1.00  0.00            
ATOM    228  HC  MOL     2     194.920 306.890 162.850  1.00  0.00            
ATOM    229  CT  MOL     2     195.560 304.410 161.160  1.00  0.00            
ATOM    230  CM  MOL     2     195.480 302.950 160.800  1.00  0.00            
ATOM    231  CM  MOL     2     194.480 302.070 160.880  1.00  0.00            
ATOM    232  CT  MOL     2     194.640 300.630 160.400  1.00  0.00            
ATOM    233  HC  MOL     2     194.660 304.700 161.700  1.00  0.00            
ATOM    234  HC  MOL     2     195.580 305.030 160.280  1.00  0.00            
ATOM    235  HC  MOL     2     196.390 302.570 160.390  1.00  0.00            
ATOM    236  HC  MOL     2     194.260 299.900 161.120  1.00  0.00            
ATOM    237  HC  MOL     2     195.670 300.390 160.180  1.00  0.00            
ATOM    238  HC  MOL     2     194.030 300.510 159.490  1.00  0.00            
ATOM    239  CT  MOL     2     193.060 302.300 161.390  1.00  0.00            
ATOM    240  HC  MOL     2     192.290 301.980 160.680  1.00  0.00            
ATOM    241  HC  MOL     2     192.850 303.330 161.650  1.00  0.00            
ATOM    242  HC  MOL     2     192.920 301.720 162.290  1.00  0.00            
ATOM    243  CS  MOL     3     216.440 290.290 148.470  1.00  0.00            
ATOM    244  CW  MOL     3     215.920 291.060 149.780  1.00  0.00            
ATOM    245  NA  MOL     3     214.520 291.390 149.520  1.00  0.00            
ATOM    246  CW  MOL     3     214.130 290.960 148.170  1.00  0.00            
ATOM    247  CS  MOL     3     215.340 290.220 147.550  1.00  0.00            
ATOM    248  CM  MOL     3     212.970 291.180 147.490  1.00  0.00            
ATOM    249  CW  MOL     3     211.820 291.870 147.960  1.00  0.00            
ATOM    250  CS  MOL     3     210.550 292.180 147.130  1.00  0.00            
ATOM    251  CS  MOL     3     209.570 292.770 148.050  1.00  0.00            
ATOM    252  CW  MOL     3     210.230 292.880 149.430  1.00  0.00            
ATOM    253  NA  MOL     3     211.650 292.350 149.290  1.00  0.00            
ATOM    254  CM  MOL     3     209.610 293.290 150.560  1.00  0.00            
ATOM    255  CW  MOL     3     210.230 293.340 151.840  1.00  0.00            
ATOM    256  CS  MOL     3     209.660 293.740 153.170  1.00  0.00            
ATOM    257  CS  MOL     3     210.810 293.730 154.170  1.00  0.00            
ATOM    258  CW  MOL     3     212.020 293.260 153.370  1.00  0.00            
ATOM    259  NA  MOL     3     211.690 292.980 152.010  1.00  0.00            
ATOM    260  CM  MOL     3     213.260 293.170 154.210  1.00  0.00            
ATOM    261  CT  MOL     3     212.800 293.690 155.690  1.00  0.00            
ATOM    262  C_2 MOL     3     211.200 294.010 155.640  1.00  0.00            
ATOM    263  CW  MOL     3     214.430 292.750 153.740  1.00  0.00            
ATOM    264  NA  MOL     3     214.690 292.280 152.340  1.00  0.00            
ATOM    265  CW  MOL     3     216.040 291.920 152.130  1.00  0.00            
ATOM    266  CT  MOL     3     216.880 292.190 153.500  1.00  0.00            
ATOM    267  CT  MOL     3     215.740 292.630 154.580  1.00  0.00            
ATOM    268  CM  MOL     3     216.630 291.320 150.970  1.00  0.00            
ATOM    269  MG  MOL     3     213.240 292.470 150.700  1.00  0.00            
ATOM    270  CT  MOL     3     217.850 289.890 148.100  1.00  0.00            
ATOM    271  HC  MOL     3     218.600 290.520 148.530  1.00  0.00            
ATOM    272  HC  MOL     3     218.060 288.880 148.360  1.00  0.00            
ATOM    273  HC  MOL     3     218.020 289.980 147.030  1.00  0.00            
ATOM    274  CT  MOL     3     215.310 289.540 146.190  1.00  0.00            
ATOM    275  OH  MOL     3     216.160 288.400 146.170  1.00  0.00            
ATOM    276  HO  MOL     3     217.030 288.670 146.440  1.00  0.00            
ATOM    277  CT  MOL     3     215.710 290.500 145.060  1.00  0.00            
ATOM    278  HC  MOL     3     216.650 290.970 145.240  1.00  0.00            
ATOM    279  HC  MOL     3     214.940 291.270 144.970  1.00  0.00            
ATOM    280  HC  MOL     3     215.800 290.010 144.090  1.00  0.00            
ATOM    281  HC  MOL     3     214.290 289.160 145.990  1.00  0.00            
ATOM    282  HC  MOL     3     212.920 290.850 146.480  1.00  0.00            
ATOM    283  CT  MOL     3     208.150 293.160 147.730  1.00  0.00            
ATOM    284  CT  MOL     3     207.130 292.120 148.200  1.00  0.00            
ATOM    285  HC  MOL     3     207.320 291.120 147.780  1.00  0.00            
ATOM    286  HC  MOL     3     206.130 292.430 147.910  1.00  0.00            
ATOM    287  HC  MOL     3     207.140 292.050 149.280  1.00  0.00            
ATOM    288  HC  MOL     3     208.020 293.340 146.660  1.00  0.00            
ATOM    289  HC  MOL     3     207.980 294.120 148.240  1.00  0.00            
ATOM    290  HC  MOL     3     208.580 293.600 150.510  1.00  0.00            
ATOM    291  CT  MOL     3     208.200 293.980 153.510  1.00  0.00            
ATOM    292  CT  MOL     3     207.660 295.330 153.080  1.00  0.00            
ATOM    293  HC  MOL     3     208.220 296.100 153.570  1.00  0.00            
ATOM    294  HC  MOL     3     206.590 295.400 153.290  1.00  0.00            
ATOM    295  HC  MOL     3     207.820 295.500 152.030  1.00  0.00            
ATOM    296  HC  MOL     3     208.080 293.930 154.590  1.00  0.00            
ATOM    297  HC  MOL     3     207.580 293.220 153.070  1.00  0.00            
ATOM    298  O_2 MOL     3     210.550 294.350 156.570  1.00  0.00            
ATOM    299  HC  MOL     3     212.930 293.000 156.490  1.00  0.00            
ATOM    300  HC  MOL     3     213.280 294.620 155.990  1.00  0.00            
ATOM    301  CT  MOL     3     217.970 293.250 153.280  1.00  0.00            
ATOM    302  HC  MOL     3     218.810 292.960 152.680  1.00  0.00            
ATOM    303  HC  MOL     3     217.550 294.180 152.900  1.00  0.00            
ATOM    304  HC  MOL     3     218.360 293.460 154.290  1.00  0.00            
ATOM    305  HC  MOL     3     217.370 291.270 153.810  1.00  0.00            
ATOM    306  CT  MOL     3     210.400 291.940 145.660  1.00  0.00            
ATOM    307  HC  MOL     3     209.550 291.290 145.460  1.00  0.00            
ATOM    308  HC  MOL     3     210.210 292.890 145.130  1.00  0.00            
ATOM    309  HC  MOL     3     211.260 291.470 145.190  1.00  0.00            
ATOM    310  CT  MOL     3     218.080 290.810 151.060  1.00  0.00            
ATOM    311  HC  MOL     3     218.780 291.470 150.580  1.00  0.00            
ATOM    312  HC  MOL     3     218.190 289.810 150.680  1.00  0.00            
ATOM    313  HC  MOL     3     218.440 290.710 152.070  1.00  0.00            
ATOM    314  HC  MOL     3     216.010 293.610 155.000  1.00  0.00            
ATOM    315  CT  MOL     3     215.580 291.580 155.710  1.00  0.00            
ATOM    316  CT  MOL     3     216.220 291.980 157.090  1.00  0.00            
ATOM    317  HC  MOL     3     215.960 290.630 155.420  1.00  0.00            
ATOM    318  HC  MOL     3     214.530 291.440 155.910  1.00  0.00            
ATOM    319  HC  MOL     3     215.740 292.900 157.430  1.00  0.00            
ATOM    320  HC  MOL     3     215.990 291.170 157.800  1.00  0.00            
ATOM    321  C_2 MOL     3     217.740 292.180 157.090  1.00  0.00            
ATOM    322  OS  MOL     3     218.100 293.200 157.880  1.00  0.00            
ATOM    323  O_2 MOL     3     218.470 291.570 156.370  1.00  0.00            
ATOM    324  CT  MOL     3     219.470 293.640 157.880  1.00  0.00            
ATOM    325  CM  MOL     3     219.610 294.710 158.940  1.00  0.00            
ATOM    326  CM  MOL     3     219.820 296.020 158.780  1.00  0.00            
ATOM    327  CT  MOL     3     220.020 296.940 160.000  1.00  0.00            
ATOM    328  HC  MOL     3     219.770 293.900 156.880  1.00  0.00            
ATOM    329  HC  MOL     3     220.130 292.800 158.150  1.00  0.00            
ATOM    330  HC  MOL     3     219.610 294.310 159.930  1.00  0.00            
ATOM    331  HC  MOL     3     219.280 297.730 159.960  1.00  0.00            
ATOM    332  HC  MOL     3     219.840 296.360 160.920  1.00  0.00            
ATOM    333  CT  MOL     3     219.920 296.740 157.470  1.00  0.00            
ATOM    334  HC  MOL     3     219.430 296.250 156.610  1.00  0.00            
ATOM    335  HC  MOL     3     221.000 296.840 157.240  1.00  0.00            
ATOM    336  HC  MOL     3     219.480 297.730 157.530  1.00  0.00            
ATOM    337  CT  MOL     3     221.420 297.580 160.120  1.00  0.00            
ATOM    338  CM  MOL     3     221.480 298.530 161.300  1.00  0.00            
ATOM    339  CM  MOL     3     221.220 299.830 161.300  1.00  0.00            
ATOM    340  CT  MOL     3     221.380 300.730 162.530  1.00  0.00            
ATOM    341  HC  MOL     3     222.130 296.770 160.310  1.00  0.00            
ATOM    342  HC  MOL     3     221.730 298.030 159.200  1.00  0.00            
ATOM    343  HC  MOL     3     221.800 298.030 162.220  1.00  0.00            
ATOM    344  HC  MOL     3     220.390 301.090 162.830  1.00  0.00            
ATOM    345  HC  MOL     3     221.950 301.630 162.290  1.00  0.00            
ATOM    346  CT  MOL     3     220.810 300.620 160.050  1.00  0.00            
ATOM    347  HC  MOL     3     220.930 300.010 159.150  1.00  0.00            
ATOM    348  HC  MOL     3     221.430 301.520 159.970  1.00  0.00            
ATOM    349  HC  MOL     3     219.780 300.930 160.140  1.00  0.00            
ATOM    350  CT  MOL     3     222.090 300.090 163.750  1.00  0.00            
ATOM    351  CM  MOL     3     222.250 301.060 164.920  1.00  0.00            
ATOM    352  CM  MOL     3     223.330 301.640 165.400  1.00  0.00            
ATOM    353  CT  MOL     3     223.200 302.530 166.610  1.00  0.00            
ATOM    354  HC  MOL     3     221.440 299.260 164.120  1.00  0.00            
ATOM    355  HC  MOL     3     223.050 299.700 163.480  1.00  0.00            
ATOM    356  HC  MOL     3     221.300 301.250 165.430  1.00  0.00            
ATOM    357  HC  MOL     3     223.750 302.140 167.460  1.00  0.00            
ATOM    358  HC  MOL     3     222.190 302.610 166.960  1.00  0.00            
ATOM    359  HC  MOL     3     223.570 303.510 166.390  1.00  0.00            
ATOM    360  CT  MOL     3     224.740 301.550 164.840  1.00  0.00            
ATOM    361  HC  MOL     3     224.820 300.940 163.940  1.00  0.00            
ATOM    362  HC  MOL     3     225.400 301.100 165.600  1.00  0.00            
ATOM    363  HC  MOL     3     225.110 302.540 164.590  1.00  0.00            
ATOM    364  CS  MOL     4     210.600 296.970 150.400  1.00  0.00            
ATOM    365  CW  MOL     4     209.950 297.770 151.620  1.00  0.00            
ATOM    366  NA  MOL     4     210.960 297.830 152.670  1.00  0.00            
ATOM    367  CW  MOL     4     212.230 297.210 152.180  1.00  0.00            
ATOM    368  CS  MOL     4     211.970 296.690 150.750  1.00  0.00            
ATOM    369  CM  MOL     4     213.420 297.050 152.800  1.00  0.00            
ATOM    370  CW  MOL     4     213.760 297.360 154.150  1.00  0.00            
ATOM    371  CS  MOL     4     215.140 297.110 154.760  1.00  0.00            
ATOM    372  CS  MOL     4     215.060 297.530 156.160  1.00  0.00            
ATOM    373  CW  MOL     4     213.640 298.040 156.420  1.00  0.00            
ATOM    374  NA  MOL     4     212.890 297.960 155.110  1.00  0.00            
ATOM    375  CM  MOL     4     213.140 298.490 157.610  1.00  0.00            
ATOM    376  CW  MOL     4     211.860 299.050 157.760  1.00  0.00            
ATOM    377  CS  MOL     4     211.200 299.660 158.960  1.00  0.00            
ATOM    378  CS  MOL     4     209.840 300.130 158.520  1.00  0.00            
ATOM    379  CW  MOL     4     209.770 299.840 157.000  1.00  0.00            
ATOM    380  NA  MOL     4     210.950 299.200 156.540  1.00  0.00            
ATOM    381  CM  MOL     4     208.420 300.160 156.420  1.00  0.00            
ATOM    382  CT  MOL     4     207.560 300.830 157.640  1.00  0.00            
ATOM    383  C_2 MOL     4     208.520 300.770 158.990  1.00  0.00            
ATOM    384  CW  MOL     4     208.050 299.890 155.160  1.00  0.00            
ATOM    385  NA  MOL     4     208.870 299.140 154.160  1.00  0.00            
ATOM    386  CW  MOL     4     208.170 298.870 152.950  1.00  0.00            
ATOM    387  CT  MOL     4     206.640 299.400 153.090  1.00  0.00            
ATOM    388  CT  MOL     4     206.590 300.130 154.560  1.00  0.00            
ATOM    389  CM  MOL     4     208.640 298.260 151.750  1.00  0.00            
ATOM    390  MG  MOL     4     210.990 298.700 154.540  1.00  0.00            
ATOM    391  CT  MOL     4     209.900 296.500 149.150  1.00  0.00            
ATOM    392  HC  MOL     4     208.840 296.330 149.300  1.00  0.00            
ATOM    393  HC  MOL     4     210.070 297.160 148.300  1.00  0.00            
ATOM    394  HC  MOL     4     210.310 295.550 148.820  1.00  0.00            
ATOM    395  CT  MOL     4     213.100 295.990 149.970  1.00  0.00            
ATOM    396  OH  MOL     4     213.390 294.750 150.560  1.00  0.00            
ATOM    397  HO  MOL     4     213.040 294.800 151.470  1.00  0.00            
ATOM    398  CT  MOL     4     213.000 295.870 148.460  1.00  0.00            
ATOM    399  HC  MOL     4     212.280 295.120 148.140  1.00  0.00            
ATOM    400  HC  MOL     4     213.920 295.540 148.000  1.00  0.00            
ATOM    401  HC  MOL     4     212.750 296.830 148.010  1.00  0.00            
ATOM    402  HC  MOL     4     213.980 296.610 150.120  1.00  0.00            
ATOM    403  HC  MOL     4     214.240 296.650 152.260  1.00  0.00            
ATOM    404  CT  MOL     4     216.190 297.430 157.180  1.00  0.00            
ATOM    405  CT  MOL     4     216.180 296.080 157.950  1.00  0.00            
ATOM    406  HC  MOL     4     216.260 295.210 157.260  1.00  0.00            
ATOM    407  HC  MOL     4     215.280 296.000 158.550  1.00  0.00            
ATOM    408  HC  MOL     4     217.040 296.060 158.630  1.00  0.00            
ATOM    409  HC  MOL     4     217.120 297.550 156.660  1.00  0.00            
ATOM    410  HC  MOL     4     216.180 298.240 157.880  1.00  0.00            
ATOM    411  HC  MOL     4     213.770 298.490 158.470  1.00  0.00            
ATOM    412  CT  MOL     4     211.770 299.850 160.340  1.00  0.00            
ATOM    413  CT  MOL     4     211.220 298.860 161.360  1.00  0.00            
ATOM    414  HC  MOL     4     211.470 297.860 161.030  1.00  0.00            
ATOM    415  HC  MOL     4     210.120 298.930 161.380  1.00  0.00            
ATOM    416  HC  MOL     4     211.560 299.040 162.370  1.00  0.00            
ATOM    417  HC  MOL     4     211.550 300.860 160.730  1.00  0.00            
ATOM    418  HC  MOL     4     212.850 299.780 160.300  1.00  0.00            
ATOM    419  O_2 MOL     4     208.160 301.120 160.080  1.00  0.00            
ATOM    420  HC  MOL     4     207.220 301.870 157.480  1.00  0.00            
ATOM    421  HC  MOL     4     206.660 300.260 157.830  1.00  0.00            
ATOM    422  CT  MOL     4     205.660 298.220 153.110  1.00  0.00            
ATOM    423  HC  MOL     4     205.610 297.710 152.160  1.00  0.00            
ATOM    424  HC  MOL     4     205.930 297.500 153.890  1.00  0.00            
ATOM    425  HC  MOL     4     204.640 298.550 153.320  1.00  0.00            
ATOM    426  HC  MOL     4     206.340 300.090 152.330  1.00  0.00            
ATOM    427  CT  MOL     4     216.330 296.520 154.010  1.00  0.00            
ATOM    428  HC  MOL     4     217.020 295.990 154.660  1.00  0.00            
ATOM    429  HC  MOL     4     215.950 295.790 153.300  1.00  0.00            
ATOM    430  HC  MOL     4     216.880 297.300 153.490  1.00  0.00            
ATOM    431  CT  MOL     4     207.660 298.170 150.570  1.00  0.00            
ATOM    432  HC  MOL     4     208.170 298.270 149.650  1.00  0.00            
ATOM    433  HC  MOL     4     206.900 298.930 150.480  1.00  0.00            
ATOM    434  HC  MOL     4     207.140 297.220 150.550  1.00  0.00            
ATOM    435  HC  MOL     4     205.880 299.630 155.220  1.00  0.00            
ATOM    436  CT  MOL     4     206.240 301.670 154.550  1.00  0.00            
ATOM    437  CT  MOL     4     204.760 302.000 154.210  1.00  0.00            
ATOM    438  HC  MOL     4     206.900 302.170 153.850  1.00  0.00            
ATOM    439  HC  MOL     4     206.400 302.080 155.530  1.00  0.00            
ATOM    440  HC  MOL     4     204.630 303.070 154.120  1.00  0.00            
ATOM    441  HC  MOL     4     204.510 301.550 153.270  1.00  0.00            
ATOM    442  C_2 MOL     4     203.740 301.380 155.140  1.00  0.00            
ATOM    443  OS  MOL     4     203.670 302.030 156.320  1.00  0.00            
ATOM    444  O_2 MOL     4     203.250 300.320 154.940  1.00  0.00            
ATOM    445  CT  MOL     4     202.870 301.560 157.440  1.00  0.00            
ATOM    446  CM  MOL     4     201.570 302.370 157.350  1.00  0.00            
ATOM    447  CM  MOL     4     201.160 303.370 158.130  1.00  0.00            
ATOM    448  CT  MOL     4     199.850 304.070 157.750  1.00  0.00            
ATOM    449  HC  MOL     4     203.440 301.770 158.350  1.00  0.00            
ATOM    450  HC  MOL     4     202.660 300.510 157.340  1.00  0.00            
ATOM    451  HC  MOL     4     200.970 302.090 156.500  1.00  0.00            
ATOM    452  HC  MOL     4     199.950 305.150 157.870  1.00  0.00            
ATOM    453  HC  MOL     4     199.690 303.950 156.690  1.00  0.00            
ATOM    454  CT  MOL     4     201.920 303.950 159.310  1.00  0.00            
ATOM    455  HC  MOL     4     202.760 303.360 159.660  1.00  0.00            
ATOM    456  HC  MOL     4     201.240 304.110 160.130  1.00  0.00            
ATOM    457  HC  MOL     4     202.300 304.940 159.120  1.00  0.00            
ATOM    458  CT  MOL     4     198.600 303.590 158.520  1.00  0.00            
ATOM    459  CM  MOL     4     198.340 302.120 158.290  1.00  0.00            
ATOM    460  CM  MOL     4     197.270 301.480 157.820  1.00  0.00            
ATOM    461  CT  MOL     4     197.260 299.940 157.610  1.00  0.00            
ATOM    462  HC  MOL     4     198.740 303.740 159.560  1.00  0.00            
ATOM    463  HC  MOL     4     197.790 304.240 158.220  1.00  0.00            
ATOM    464  HC  MOL     4     199.220 301.530 158.580  1.00  0.00            
ATOM    465  HC  MOL     4     197.080 299.710 156.540  1.00  0.00            
ATOM    466  HC  MOL     4     196.420 299.540 158.120  1.00  0.00            
ATOM    467  CT  MOL     4     195.990 302.150 157.350  1.00  0.00            
ATOM    468  HC  MOL     4     195.940 303.200 157.570  1.00  0.00            
ATOM    469  HC  MOL     4     195.110 301.770 157.820  1.00  0.00            
ATOM    470  HC  MOL     4     195.770 302.020 156.310  1.00  0.00            
ATOM    471  CT  MOL     4     198.500 299.120 158.040  1.00  0.00            
ATOM    472  CM  MOL     4     198.390 297.620 157.800  1.00  0.00            
ATOM    473  CM  MOL     4     198.980 296.810 156.910  1.00  0.00            
ATOM    474  CT  MOL     4     198.640 295.340 156.940  1.00  0.00            
ATOM    475  HC  MOL     4     199.360 299.500 157.490  1.00  0.00            
ATOM    476  HC  MOL     4     198.710 299.290 159.090  1.00  0.00            
ATOM    477  HC  MOL     4     197.710 297.130 158.500  1.00  0.00            
ATOM    478  HC  MOL     4     198.380 294.980 155.950  1.00  0.00            
ATOM    479  HC  MOL     4     197.790 295.100 157.570  1.00  0.00            
ATOM    480  HC  MOL     4     199.490 294.730 157.300  1.00  0.00            
ATOM    481  CT  MOL     4     199.980 297.210 155.830  1.00  0.00            
ATOM    482  HC  MOL     4     200.940 296.730 155.910  1.00  0.00            
ATOM    483  HC  MOL     4     200.210 298.270 155.910  1.00  0.00            
ATOM    484  HC  MOL     4     199.540 296.980 154.850  1.00  0.00            
ATOM    485  CS  MOL     5     221.990 277.990 142.270  1.00  0.00            
ATOM    486  CW  MOL     5     221.280 278.890 143.360  1.00  0.00            
ATOM    487  NA  MOL     5     219.910 279.070 142.920  1.00  0.00            
ATOM    488  CW  MOL     5     219.700 278.380 141.620  1.00  0.00            
ATOM    489  CS  MOL     5     221.010 277.630 141.290  1.00  0.00            
ATOM    490  CM  MOL     5     218.650 278.480 140.790  1.00  0.00            
ATOM    491  CW  MOL     5     217.420 279.210 140.970  1.00  0.00            
ATOM    492  CS  MOL     5     216.290 279.350 139.930  1.00  0.00            
ATOM    493  CS  MOL     5     215.160 280.000 140.580  1.00  0.00            
ATOM    494  CW  MOL     5     215.560 280.290 142.020  1.00  0.00            
ATOM    495  NA  MOL     5     217.000 279.810 142.200  1.00  0.00            
ATOM    496  CM  MOL     5     214.800 280.910 142.970  1.00  0.00            
ATOM    497  CW  MOL     5     215.240 281.230 144.240  1.00  0.00            
ATOM    498  CS  MOL     5     214.550 281.900 145.400  1.00  0.00            
ATOM    499  CS  MOL     5     215.500 281.940 146.550  1.00  0.00            
ATOM    500  CW  MOL     5     216.800 281.270 146.040  1.00  0.00            
ATOM    501  NA  MOL     5     216.640 280.850 144.690  1.00  0.00            
ATOM    502  CM  MOL     5     217.880 281.310 147.070  1.00  0.00            
ATOM    503  CT  MOL     5     217.210 282.010 148.390  1.00  0.00            
ATOM    504  C_2 MOL     5     215.650 282.410 147.990  1.00  0.00            
ATOM    505  CW  MOL     5     219.120 280.840 146.860  1.00  0.00            
ATOM    506  NA  MOL     5     219.600 280.290 145.560  1.00  0.00            
ATOM    507  CW  MOL     5     220.990 280.070 145.550  1.00  0.00            
ATOM    508  CT  MOL     5     221.630 280.530 146.960  1.00  0.00            
ATOM    509  CT  MOL     5     220.350 280.940 147.880  1.00  0.00            
ATOM    510  CM  MOL     5     221.800 279.380 144.570  1.00  0.00            
ATOM    511  MG  MOL     5     218.390 280.210 143.750  1.00  0.00            
ATOM    512  CT  MOL     5     223.430 277.620 142.150  1.00  0.00            
ATOM    513  HC  MOL     5     224.100 278.450 142.430  1.00  0.00            
ATOM    514  HC  MOL     5     223.730 276.780 142.760  1.00  0.00            
ATOM    515  HC  MOL     5     223.700 277.440 141.120  1.00  0.00            
ATOM    516  CT  MOL     5     221.140 276.700 140.080  1.00  0.00            
ATOM    517  OH  MOL     5     221.940 275.560 140.310  1.00  0.00            
ATOM    518  HO  MOL     5     222.730 275.790 140.760  1.00  0.00            
ATOM    519  CT  MOL     5     221.690 277.470 138.870  1.00  0.00            
ATOM    520  HC  MOL     5     222.730 277.740 139.010  1.00  0.00            
ATOM    521  HC  MOL     5     221.110 278.370 138.710  1.00  0.00            
ATOM    522  HC  MOL     5     221.590 276.880 137.980  1.00  0.00            
ATOM    523  HC  MOL     5     220.180 276.300 139.800  1.00  0.00            
ATOM    524  HC  MOL     5     218.770 278.030 139.860  1.00  0.00            
ATOM    525  CT  MOL     5     213.820 280.300 139.980  1.00  0.00            
ATOM    526  CT  MOL     5     212.700 279.360 140.430  1.00  0.00            
ATOM    527  HC  MOL     5     212.970 278.320 140.290  1.00  0.00            
ATOM    528  HC  MOL     5     211.750 279.530 139.910  1.00  0.00            
ATOM    529  HC  MOL     5     212.490 279.450 141.510  1.00  0.00            
ATOM    530  HC  MOL     5     213.880 280.270 138.900  1.00  0.00            
ATOM    531  HC  MOL     5     213.550 281.320 140.180  1.00  0.00            
ATOM    532  HC  MOL     5     213.780 281.190 142.750  1.00  0.00            
ATOM    533  CT  MOL     5     213.180 282.510 145.450  1.00  0.00            
ATOM    534  CT  MOL     5     212.110 281.600 146.020  1.00  0.00            
ATOM    535  HC  MOL     5     212.070 280.690 145.460  1.00  0.00            
ATOM    536  HC  MOL     5     211.110 282.080 146.010  1.00  0.00            
ATOM    537  HC  MOL     5     212.360 281.340 147.040  1.00  0.00            
ATOM    538  HC  MOL     5     212.930 282.730 144.390  1.00  0.00            
ATOM    539  HC  MOL     5     213.160 283.460 145.940  1.00  0.00            
ATOM    540  O_2 MOL     5     214.850 282.940 148.720  1.00  0.00            
ATOM    541  HC  MOL     5     217.120 281.350 149.230  1.00  0.00            
ATOM    542  HC  MOL     5     217.760 282.910 148.680  1.00  0.00            
ATOM    543  CT  MOL     5     222.510 281.780 146.730  1.00  0.00            
ATOM    544  HC  MOL     5     223.410 281.610 146.120  1.00  0.00            
ATOM    545  HC  MOL     5     221.920 282.540 146.230  1.00  0.00            
ATOM    546  HC  MOL     5     222.860 282.140 147.720  1.00  0.00            
ATOM    547  HC  MOL     5     222.180 279.740 147.370  1.00  0.00            
ATOM    548  CT  MOL     5     216.400 278.930 138.480  1.00  0.00            
ATOM    549  HC  MOL     5     215.470 278.660 138.050  1.00  0.00            
ATOM    550  HC  MOL     5     216.840 279.680 137.860  1.00  0.00            
ATOM    551  HC  MOL     5     217.060 278.090 138.340  1.00  0.00            
ATOM    552  CT  MOL     5     223.290 279.160 144.890  1.00  0.00            
ATOM    553  HC  MOL     5     223.900 279.880 144.390  1.00  0.00            
ATOM    554  HC  MOL     5     223.620 278.160 144.610  1.00  0.00            
ATOM    555  HC  MOL     5     223.560 279.240 145.930  1.00  0.00            
ATOM    556  HC  MOL     5     220.430 281.990 148.180  1.00  0.00            
ATOM    557  CT  MOL     5     220.130 280.030 149.120  1.00  0.00            
ATOM    558  CT  MOL     5     221.150 280.010 150.290  1.00  0.00            
ATOM    559  HC  MOL     5     219.950 278.990 148.790  1.00  0.00            
ATOM    560  HC  MOL     5     219.190 280.370 149.540  1.00  0.00            
ATOM    561  HC  MOL     5     221.570 281.010 150.500  1.00  0.00            
ATOM    562  HC  MOL     5     220.560 279.760 151.160  1.00  0.00            
ATOM    563  C_2 MOL     5     222.310 279.050 150.220  1.00  0.00            
ATOM    564  OS  MOL     5     223.080 279.070 151.310  1.00  0.00            
ATOM    565  O_2 MOL     5     222.620 278.420 149.250  1.00  0.00            
ATOM    566  CT  MOL     5     224.270 278.270 151.400  1.00  0.00            
ATOM    567  CM  MOL     5     224.780 278.520 152.790  1.00  0.00            
ATOM    568  CM  MOL     5     225.810 279.260 153.190  1.00  0.00            
ATOM    569  CT  MOL     5     226.100 279.370 154.690  1.00  0.00            
ATOM    570  HC  MOL     5     224.930 278.570 150.620  1.00  0.00            
ATOM    571  HC  MOL     5     224.020 277.200 151.270  1.00  0.00            
ATOM    572  HC  MOL     5     224.200 277.980 153.520  1.00  0.00            
ATOM    573  HC  MOL     5     226.080 280.420 154.960  1.00  0.00            
ATOM    574  HC  MOL     5     225.270 278.950 155.250  1.00  0.00            
ATOM    575  CT  MOL     5     226.750 280.040 152.310  1.00  0.00            
ATOM    576  HC  MOL     5     226.530 280.040 151.240  1.00  0.00            
ATOM    577  HC  MOL     5     227.740 279.650 152.420  1.00  0.00            
ATOM    578  HC  MOL     5     226.740 281.070 152.610  1.00  0.00            
ATOM    579  CT  MOL     5     227.420 278.700 155.170  1.00  0.00            
ATOM    580  CM  MOL     5     227.570 278.770 156.680  1.00  0.00            
ATOM    581  CM  MOL     5     227.770 277.810 157.560  1.00  0.00            
ATOM    582  CT  MOL     5     228.040 278.200 159.020  1.00  0.00            
ATOM    583  HC  MOL     5     227.410 277.690 154.790  1.00  0.00            
ATOM    584  HC  MOL     5     228.270 279.170 154.720  1.00  0.00            
ATOM    585  HC  MOL     5     227.590 279.780 157.020  1.00  0.00            
ATOM    586  HC  MOL     5     228.370 279.240 159.050  1.00  0.00            
ATOM    587  HC  MOL     5     228.870 277.610 159.390  1.00  0.00            
ATOM    588  CT  MOL     5     227.860 276.330 157.280  1.00  0.00            
ATOM    589  HC  MOL     5     227.460 276.090 156.280  1.00  0.00            
ATOM    590  HC  MOL     5     227.330 275.710 157.990  1.00  0.00            
ATOM    591  HC  MOL     5     228.880 276.010 157.280  1.00  0.00            
ATOM    592  CT  MOL     5     226.800 278.040 159.900  1.00  0.00            
ATOM    593  CM  MOL     5     227.030 278.440 161.310  1.00  0.00            
ATOM    594  CM  MOL     5     226.750 277.770 162.440  1.00  0.00            
ATOM    595  CT  MOL     5     227.150 278.280 163.800  1.00  0.00            
ATOM    596  HC  MOL     5     226.040 278.690 159.510  1.00  0.00            
ATOM    597  HC  MOL     5     226.460 277.000 159.800  1.00  0.00            
ATOM    598  HC  MOL     5     227.520 279.410 161.410  1.00  0.00            
ATOM    599  HC  MOL     5     226.320 278.390 164.490  1.00  0.00            
ATOM    600  HC  MOL     5     227.600 279.260 163.770  1.00  0.00            
ATOM    601  HC  MOL     5     227.840 277.580 164.270  1.00  0.00            
ATOM    602  CT  MOL     5     226.040 276.430 162.500  1.00  0.00            
ATOM    603  HC  MOL     5     225.800 275.970 161.530  1.00  0.00            
ATOM    604  HC  MOL     5     225.070 276.490 163.010  1.00  0.00            
ATOM    605  HC  MOL     5     226.620 275.700 163.010  1.00  0.00            
ATOM    606  CS  MOL     6     216.650 284.290 143.040  1.00  0.00            
ATOM    607  CW  MOL     6     215.540 285.010 143.930  1.00  0.00            
ATOM    608  NA  MOL     6     216.150 285.310 145.230  1.00  0.00            
ATOM    609  CW  MOL     6     217.550 284.800 145.240  1.00  0.00            
ATOM    610  CS  MOL     6     217.820 284.120 143.880  1.00  0.00            
ATOM    611  CM  MOL     6     218.490 284.910 146.200  1.00  0.00            
ATOM    612  CW  MOL     6     218.400 285.520 147.490  1.00  0.00            
ATOM    613  CS  MOL     6     219.550 285.590 148.520  1.00  0.00            
ATOM    614  CS  MOL     6     219.000 286.240 149.720  1.00  0.00            
ATOM    615  CW  MOL     6     217.530 286.580 149.450  1.00  0.00            
ATOM    616  NA  MOL     6     217.220 286.110 148.040  1.00  0.00            
ATOM    617  CM  MOL     6     216.660 287.190 150.330  1.00  0.00            
ATOM    618  CW  MOL     6     215.310 287.380 150.050  1.00  0.00            
ATOM    619  CS  MOL     6     214.230 287.990 150.890  1.00  0.00            
ATOM    620  CS  MOL     6     212.980 287.990 150.040  1.00  0.00            
ATOM    621  CW  MOL     6     213.380 287.400 148.700  1.00  0.00            
ATOM    622  NA  MOL     6     214.750 287.020 148.690  1.00  0.00            
ATOM    623  CM  MOL     6     212.260 287.450 147.690  1.00  0.00            
ATOM    624  CT  MOL     6     210.990 288.090 148.500  1.00  0.00            
ATOM    625  C_2 MOL     6     211.490 288.430 150.030  1.00  0.00            
ATOM    626  CW  MOL     6     212.350 287.070 146.430  1.00  0.00            
ATOM    627  NA  MOL     6     213.540 286.430 145.800  1.00  0.00            
ATOM    628  CW  MOL     6     213.310 285.950 144.510  1.00  0.00            
ATOM    629  CT  MOL     6     211.730 286.160 144.150  1.00  0.00            
ATOM    630  CT  MOL     6     211.150 287.040 145.400  1.00  0.00            
ATOM    631  CM  MOL     6     214.220 285.280 143.610  1.00  0.00            
ATOM    632  MG  MOL     6     215.500 286.430 146.830  1.00  0.00            
ATOM    633  CT  MOL     6     216.570 283.850 141.610  1.00  0.00            
ATOM    634  HC  MOL     6     215.880 283.060 141.400  1.00  0.00            
ATOM    635  HC  MOL     6     216.210 284.690 141.040  1.00  0.00            
ATOM    636  HC  MOL     6     217.520 283.590 141.210  1.00  0.00            
ATOM    637  CT  MOL     6     219.110 283.360 143.520  1.00  0.00            
ATOM    638  OH  MOL     6     218.860 282.090 142.910  1.00  0.00            
ATOM    639  HO  MOL     6     218.370 282.220 142.080  1.00  0.00            
ATOM    640  CT  MOL     6     220.130 284.190 142.740  1.00  0.00            
ATOM    641  HC  MOL     6     219.760 284.500 141.790  1.00  0.00            
ATOM    642  HC  MOL     6     221.040 283.600 142.590  1.00  0.00            
ATOM    643  HC  MOL     6     220.370 285.140 143.270  1.00  0.00            
ATOM    644  HC  MOL     6     219.580 283.070 144.460  1.00  0.00            
ATOM    645  HC  MOL     6     219.490 284.540 146.030  1.00  0.00            
ATOM    646  CT  MOL     6     219.710 286.430 151.030  1.00  0.00            
ATOM    647  CT  MOL     6     219.400 285.310 152.040  1.00  0.00            
ATOM    648  HC  MOL     6     219.650 284.350 151.620  1.00  0.00            
ATOM    649  HC  MOL     6     218.360 285.310 152.390  1.00  0.00            
ATOM    650  HC  MOL     6     220.030 285.420 152.920  1.00  0.00            
ATOM    651  HC  MOL     6     220.780 286.480 150.880  1.00  0.00            
ATOM    652  HC  MOL     6     219.420 287.400 151.440  1.00  0.00            
ATOM    653  HC  MOL     6     216.990 287.450 151.310  1.00  0.00            
ATOM    654  CT  MOL     6     214.380 288.630 152.250  1.00  0.00            
ATOM    655  CT  MOL     6     213.890 287.770 153.400  1.00  0.00            
ATOM    656  HC  MOL     6     214.520 286.920 153.520  1.00  0.00            
ATOM    657  HC  MOL     6     212.870 287.410 153.210  1.00  0.00            
ATOM    658  HC  MOL     6     213.970 288.360 154.320  1.00  0.00            
ATOM    659  HC  MOL     6     213.760 289.520 152.190  1.00  0.00            
ATOM    660  HC  MOL     6     215.400 288.950 152.430  1.00  0.00            
ATOM    661  O_2 MOL     6     210.820 288.970 150.860  1.00  0.00            
ATOM    662  HC  MOL     6     210.620 289.020 148.070  1.00  0.00            
ATOM    663  HC  MOL     6     210.160 287.420 148.590  1.00  0.00            
ATOM    664  CT  MOL     6     210.920 284.830 144.090  1.00  0.00            
ATOM    665  HC  MOL     6     211.250 284.180 143.300  1.00  0.00            
ATOM    666  HC  MOL     6     210.970 284.300 145.050  1.00  0.00            
ATOM    667  HC  MOL     6     209.860 285.030 143.890  1.00  0.00            
ATOM    668  HC  MOL     6     211.600 286.660 143.200  1.00  0.00            
ATOM    669  CT  MOL     6     220.950 285.100 148.300  1.00  0.00            
ATOM    670  HC  MOL     6     221.400 284.830 149.240  1.00  0.00            
ATOM    671  HC  MOL     6     220.990 284.220 147.660  1.00  0.00            
ATOM    672  HC  MOL     6     221.630 285.860 147.900  1.00  0.00            
ATOM    673  CT  MOL     6     213.690 284.810 142.230  1.00  0.00            
ATOM    674  HC  MOL     6     214.200 285.300 141.440  1.00  0.00            
ATOM    675  HC  MOL     6     212.650 285.010 141.990  1.00  0.00            
ATOM    676  HC  MOL     6     213.840 283.760 142.100  1.00  0.00            
ATOM    677  HC  MOL     6     210.290 286.620 145.850  1.00  0.00            
ATOM    678  CT  MOL     6     210.730 288.460 144.920  1.00  0.00            
ATOM    679  CT  MOL     6     209.370 288.570 144.150  1.00  0.00            
ATOM    680  HC  MOL     6     211.540 288.850 144.320  1.00  0.00            
ATOM    681  HC  MOL     6     210.640 289.110 145.760  1.00  0.00            
ATOM    682  HC  MOL     6     209.350 289.550 143.730  1.00  0.00            
ATOM    683  HC  MOL     6     209.340 287.790 143.370  1.00  0.00            
ATOM    684  C_2 MOL     6     208.170 288.440 145.040  1.00  0.00            
ATOM    685  OS  MOL     6     207.580 287.250 144.950  1.00  0.00            
ATOM    686  O_2 MOL     6     207.860 289.260 145.850  1.00  0.00            
ATOM    687  CT  MOL     6     206.430 286.980 145.770  1.00  0.00            
ATOM    688  CM  MOL     6     205.960 285.590 145.410  1.00  0.00            
ATOM    689  CM  MOL     6     204.740 285.160 145.130  1.00  0.00            
ATOM    690  CT  MOL     6     204.500 283.680 144.910  1.00  0.00            
ATOM    691  HC  MOL     6     205.670 287.700 145.530  1.00  0.00            
ATOM    692  HC  MOL     6     206.720 287.040 146.810  1.00  0.00            
ATOM    693  HC  MOL     6     206.770 284.880 145.450  1.00  0.00            
ATOM    694  HC  MOL     6     204.020 283.460 143.940  1.00  0.00            
ATOM    695  HC  MOL     6     205.460 283.190 144.820  1.00  0.00            
ATOM    696  CT  MOL     6     203.490 286.020 145.030  1.00  0.00            
ATOM    697  HC  MOL     6     203.580 287.060 145.310  1.00  0.00            
ATOM    698  HC  MOL     6     202.680 285.630 145.650  1.00  0.00            
ATOM    699  HC  MOL     6     203.130 286.000 144.010  1.00  0.00            
ATOM    700  CT  MOL     6     203.690 283.000 146.010  1.00  0.00            
ATOM    701  CM  MOL     6     203.620 281.490 145.860  1.00  0.00            
ATOM    702  CM  MOL     6     202.600 280.630 145.930  1.00  0.00            
ATOM    703  CT  MOL     6     202.930 279.130 145.860  1.00  0.00            
ATOM    704  HC  MOL     6     204.190 283.190 146.960  1.00  0.00            
ATOM    705  HC  MOL     6     202.690 283.440 146.090  1.00  0.00            
ATOM    706  HC  MOL     6     204.580 281.070 145.670  1.00  0.00            
ATOM    707  HC  MOL     6     202.650 278.690 146.810  1.00  0.00            
ATOM    708  HC  MOL     6     204.000 278.990 145.770  1.00  0.00            
ATOM    709  CT  MOL     6     201.140 280.960 146.210  1.00  0.00            
ATOM    710  HC  MOL     6     200.980 282.000 146.370  1.00  0.00            
ATOM    711  HC  MOL     6     200.770 280.410 147.060  1.00  0.00            
ATOM    712  HC  MOL     6     200.530 280.670 145.340  1.00  0.00            
ATOM    713  CT  MOL     6     202.300 278.290 144.700  1.00  0.00            
ATOM    714  CM  MOL     6     202.670 276.850 144.840  1.00  0.00            
ATOM    715  CM  MOL     6     201.950 275.850 145.390  1.00  0.00            
ATOM    716  CT  MOL     6     202.450 274.430 145.370  1.00  0.00            
ATOM    717  HC  MOL     6     201.220 278.410 144.770  1.00  0.00            
ATOM    718  HC  MOL     6     202.620 278.660 143.700  1.00  0.00            
ATOM    719  HC  MOL     6     203.600 276.560 144.380  1.00  0.00            
ATOM    720  HC  MOL     6     202.690 274.090 146.390  1.00  0.00            
ATOM    721  HC  MOL     6     203.330 274.320 144.730  1.00  0.00            
ATOM    722  HC  MOL     6     201.630 273.800 145.020  1.00  0.00            
ATOM    723  CT  MOL     6     200.600 275.940 146.100  1.00  0.00            
ATOM    724  HC  MOL     6     199.820 275.330 145.650  1.00  0.00            
ATOM    725  HC  MOL     6     200.210 276.920 146.210  1.00  0.00            
ATOM    726  HC  MOL     6     200.680 275.530 147.090  1.00  0.00            
ATOM    727  CS  MOL     7     228.060 264.950 137.360  1.00  0.00            
ATOM    728  CW  MOL     7     227.400 265.940 138.410  1.00  0.00            
ATOM    729  NA  MOL     7     225.950 265.960 138.150  1.00  0.00            
ATOM    730  CW  MOL     7     225.650 265.040 137.000  1.00  0.00            
ATOM    731  CS  MOL     7     227.000 264.410 136.550  1.00  0.00            
ATOM    732  CM  MOL     7     224.450 264.910 136.360  1.00  0.00            
ATOM    733  CW  MOL     7     223.170 265.490 136.710  1.00  0.00            
ATOM    734  CS  MOL     7     221.850 265.280 135.910  1.00  0.00            
ATOM    735  CS  MOL     7     220.800 265.950 136.650  1.00  0.00            
ATOM    736  CW  MOL     7     221.420 266.590 137.900  1.00  0.00            
ATOM    737  NA  MOL     7     222.900 266.300 137.870  1.00  0.00            
ATOM    738  CM  MOL     7     220.760 267.220 138.900  1.00  0.00            
ATOM    739  CW  MOL     7     221.360 267.780 140.020  1.00  0.00            
ATOM    740  CS  MOL     7     220.760 268.460 141.200  1.00  0.00            
ATOM    741  CS  MOL     7     221.910 268.940 142.050  1.00  0.00            
ATOM    742  CW  MOL     7     223.190 268.470 141.340  1.00  0.00            
ATOM    743  NA  MOL     7     222.850 267.760 140.140  1.00  0.00            
ATOM    744  CM  MOL     7     224.440 268.780 142.130  1.00  0.00            
ATOM    745  CT  MOL     7     223.910 269.610 143.440  1.00  0.00            
ATOM    746  C_2 MOL     7     222.260 269.700 143.340  1.00  0.00            
ATOM    747  CW  MOL     7     225.680 268.430 141.780  1.00  0.00            
ATOM    748  NA  MOL     7     226.020 267.690 140.530  1.00  0.00            
ATOM    749  CW  MOL     7     227.410 267.500 140.380  1.00  0.00            
ATOM    750  CT  MOL     7     228.210 268.250 141.590  1.00  0.00            
ATOM    751  CT  MOL     7     227.030 268.740 142.590  1.00  0.00            
ATOM    752  CM  MOL     7     228.060 266.670 139.420  1.00  0.00            
ATOM    753  MG  MOL     7     224.500 267.120 139.030  1.00  0.00            
ATOM    754  CT  MOL     7     229.510 264.600 137.120  1.00  0.00            
ATOM    755  HC  MOL     7     230.150 265.470 137.010  1.00  0.00            
ATOM    756  HC  MOL     7     229.890 264.060 137.980  1.00  0.00            
ATOM    757  HC  MOL     7     229.660 263.980 136.260  1.00  0.00            
ATOM    758  CT  MOL     7     227.090 263.300 135.500  1.00  0.00            
ATOM    759  OH  MOL     7     227.870 262.220 135.960  1.00  0.00            
ATOM    760  HO  MOL     7     227.840 261.560 135.270  1.00  0.00            
ATOM    761  CT  MOL     7     227.530 263.810 134.180  1.00  0.00            
ATOM    762  HC  MOL     7     228.470 264.350 134.310  1.00  0.00            
ATOM    763  HC  MOL     7     226.830 264.530 133.790  1.00  0.00            
ATOM    764  HC  MOL     7     227.670 263.030 133.450  1.00  0.00            
ATOM    765  HC  MOL     7     226.070 262.890 135.360  1.00  0.00            
ATOM    766  HC  MOL     7     224.410 264.320 135.450  1.00  0.00            
ATOM    767  CT  MOL     7     219.340 266.010 136.270  1.00  0.00            
ATOM    768  CT  MOL     7     218.520 264.950 137.050  1.00  0.00            
ATOM    769  HC  MOL     7     218.780 263.920 136.790  1.00  0.00            
ATOM    770  HC  MOL     7     217.460 265.070 136.870  1.00  0.00            
ATOM    771  HC  MOL     7     218.680 265.000 138.120  1.00  0.00            
ATOM    772  HC  MOL     7     219.200 265.890 135.220  1.00  0.00            
ATOM    773  HC  MOL     7     218.970 267.030 136.490  1.00  0.00            
ATOM    774  HC  MOL     7     219.680 267.320 138.810  1.00  0.00            
ATOM    775  CT  MOL     7     219.300 268.560 141.530  1.00  0.00            
ATOM    776  CT  MOL     7     218.540 269.650 140.770  1.00  0.00            
ATOM    777  HC  MOL     7     219.020 270.610 140.920  1.00  0.00            
ATOM    778  HC  MOL     7     217.520 269.710 141.160  1.00  0.00            
ATOM    779  HC  MOL     7     218.550 269.430 139.670  1.00  0.00            
ATOM    780  HC  MOL     7     219.190 268.750 142.590  1.00  0.00            
ATOM    781  HC  MOL     7     218.840 267.600 141.370  1.00  0.00            
ATOM    782  O_2 MOL     7     221.560 270.280 144.130  1.00  0.00            
ATOM    783  HC  MOL     7     224.080 269.080 144.370  1.00  0.00            
ATOM    784  HC  MOL     7     224.370 270.590 143.580  1.00  0.00            
ATOM    785  CT  MOL     7     229.050 269.440 141.070  1.00  0.00            
ATOM    786  HC  MOL     7     229.860 269.200 140.370  1.00  0.00            
ATOM    787  HC  MOL     7     228.420 270.160 140.560  1.00  0.00            
ATOM    788  HC  MOL     7     229.540 269.970 141.890  1.00  0.00            
ATOM    789  HC  MOL     7     228.870 267.520 142.050  1.00  0.00            
ATOM    790  CT  MOL     7     221.770 264.510 134.620  1.00  0.00            
ATOM    791  HC  MOL     7     221.990 265.120 133.770  1.00  0.00            
ATOM    792  HC  MOL     7     222.430 263.640 134.570  1.00  0.00            
ATOM    793  HC  MOL     7     220.770 264.140 134.490  1.00  0.00            
ATOM    794  CT  MOL     7     229.600 266.520 139.580  1.00  0.00            
ATOM    795  HC  MOL     7     230.080 266.980 138.770  1.00  0.00            
ATOM    796  HC  MOL     7     229.920 265.490 139.620  1.00  0.00            
ATOM    797  HC  MOL     7     230.090 266.970 140.400  1.00  0.00            
ATOM    798  HC  MOL     7     227.090 269.800 142.770  1.00  0.00            
ATOM    799  CT  MOL     7     227.040 268.050 144.010  1.00  0.00            
ATOM    800  CT  MOL     7     228.150 268.520 144.990  1.00  0.00            
ATOM    801  HC  MOL     7     227.020 266.960 143.980  1.00  0.00            
ATOM    802  HC  MOL     7     226.130 268.320 144.520  1.00  0.00            
ATOM    803  HC  MOL     7     228.470 269.550 144.820  1.00  0.00            
ATOM    804  HC  MOL     7     227.650 268.520 145.960  1.00  0.00            
ATOM    805  C_2 MOL     7     229.390 267.660 145.110  1.00  0.00            
ATOM    806  OS  MOL     7     230.250 267.810 144.080  1.00  0.00            
ATOM    807  O_2 MOL     7     229.700 267.100 146.120  1.00  0.00            
ATOM    808  CT  MOL     7     231.560 267.200 144.070  1.00  0.00            
ATOM    809  CM  MOL     7     232.060 267.150 142.650  1.00  0.00            
ATOM    810  CM  MOL     7     232.610 266.140 141.960  1.00  0.00            
ATOM    811  CT  MOL     7     232.980 266.350 140.500  1.00  0.00            
ATOM    812  HC  MOL     7     231.620 266.270 144.600  1.00  0.00            
ATOM    813  HC  MOL     7     232.230 267.860 144.590  1.00  0.00            
ATOM    814  HC  MOL     7     231.870 268.110 142.160  1.00  0.00            
ATOM    815  HC  MOL     7     232.450 265.630 139.880  1.00  0.00            
ATOM    816  HC  MOL     7     232.580 267.310 140.170  1.00  0.00            
ATOM    817  CT  MOL     7     232.950 264.800 142.580  1.00  0.00            
ATOM    818  HC  MOL     7     232.950 264.780 143.670  1.00  0.00            
ATOM    819  HC  MOL     7     233.900 264.410 142.260  1.00  0.00            
ATOM    820  HC  MOL     7     232.190 264.050 142.310  1.00  0.00            
ATOM    821  CT  MOL     7     234.490 266.310 140.150  1.00  0.00            
ATOM    822  CM  MOL     7     234.770 267.010 138.850  1.00  0.00            
ATOM    823  CM  MOL     7     234.880 266.550 137.610  1.00  0.00            
ATOM    824  CT  MOL     7     235.160 267.480 136.410  1.00  0.00            
ATOM    825  HC  MOL     7     235.050 266.770 140.940  1.00  0.00            
ATOM    826  HC  MOL     7     234.820 265.290 140.180  1.00  0.00            
ATOM    827  HC  MOL     7     234.840 268.050 139.050  1.00  0.00            
ATOM    828  HC  MOL     7     235.110 268.520 136.740  1.00  0.00            
ATOM    829  HC  MOL     7     234.340 267.420 135.680  1.00  0.00            
ATOM    830  CT  MOL     7     234.750 265.070 137.240  1.00  0.00            
ATOM    831  HC  MOL     7     234.350 264.490 138.070  1.00  0.00            
ATOM    832  HC  MOL     7     235.670 264.630 136.930  1.00  0.00            
ATOM    833  HC  MOL     7     234.070 264.960 136.410  1.00  0.00            
ATOM    834  CT  MOL     7     236.480 267.230 135.690  1.00  0.00            
ATOM    835  CM  MOL     7     236.870 268.380 134.780  1.00  0.00            
ATOM    836  CM  MOL     7     238.010 269.070 134.710  1.00  0.00            
ATOM    837  CT  MOL     7     238.210 270.240 133.760  1.00  0.00            
ATOM    838  HC  MOL     7     237.230 267.140 136.480  1.00  0.00            
ATOM    839  HC  MOL     7     236.430 266.300 135.100  1.00  0.00            
ATOM    840  HC  MOL     7     236.080 268.660 134.080  1.00  0.00            
ATOM    841  HC  MOL     7     238.370 271.190 134.260  1.00  0.00            
ATOM    842  HC  MOL     7     237.350 270.350 133.120  1.00  0.00            
ATOM    843  HC  MOL     7     239.060 270.060 133.120  1.00  0.00            
ATOM    844  CT  MOL     7     239.220 268.870 135.640  1.00  0.00            
ATOM    845  HC  MOL     7     239.080 268.150 136.430  1.00  0.00            
ATOM    846  HC  MOL     7     239.560 269.810 136.040  1.00  0.00            
ATOM    847  HC  MOL     7     240.090 268.500 135.080  1.00  0.00            
ATOM    848  CS  MOL     8     221.940 270.900 137.830  1.00  0.00            
ATOM    849  CW  MOL     8     221.010 271.860 138.700  1.00  0.00            
ATOM    850  NA  MOL     8     221.810 272.340 139.820  1.00  0.00            
ATOM    851  CW  MOL     8     223.190 271.830 139.690  1.00  0.00            
ATOM    852  CS  MOL     8     223.230 270.850 138.490  1.00  0.00            
ATOM    853  CM  MOL     8     224.250 272.180 140.460  1.00  0.00            
ATOM    854  CW  MOL     8     224.300 272.990 141.630  1.00  0.00            
ATOM    855  CS  MOL     8     225.560 273.200 142.460  1.00  0.00            
ATOM    856  CS  MOL     8     225.200 273.980 143.640  1.00  0.00            
ATOM    857  CW  MOL     8     223.670 274.210 143.570  1.00  0.00            
ATOM    858  NA  MOL     8     223.180 273.600 142.270  1.00  0.00            
ATOM    859  CM  MOL     8     222.920 274.840 144.500  1.00  0.00            
ATOM    860  CW  MOL     8     221.550 275.070 144.340  1.00  0.00            
ATOM    861  CS  MOL     8     220.610 275.840 145.220  1.00  0.00            
ATOM    862  CS  MOL     8     219.270 275.870 144.500  1.00  0.00            
ATOM    863  CW  MOL     8     219.460 275.070 143.200  1.00  0.00            
ATOM    864  NA  MOL     8     220.800 274.610 143.090  1.00  0.00            
ATOM    865  CM  MOL     8     218.220 275.040 142.350  1.00  0.00            
ATOM    866  CT  MOL     8     217.100 275.890 143.210  1.00  0.00            
ATOM    867  C_2 MOL     8     217.840 276.440 144.560  1.00  0.00            
ATOM    868  CW  MOL     8     218.130 274.410 141.170  1.00  0.00            
ATOM    869  NA  MOL     8     219.260 273.640 140.510  1.00  0.00            
ATOM    870  CW  MOL     8     218.860 272.990 139.320  1.00  0.00            
ATOM    871  CT  MOL     8     217.270 273.250 139.070  1.00  0.00            
ATOM    872  CT  MOL     8     216.810 274.270 140.250  1.00  0.00            
ATOM    873  CM  MOL     8     219.660 272.170 138.450  1.00  0.00            
ATOM    874  MG  MOL     8     221.310 273.710 141.270  1.00  0.00            
ATOM    875  CT  MOL     8     221.590 270.090 136.600  1.00  0.00            
ATOM    876  HC  MOL     8     220.760 269.440 136.730  1.00  0.00            
ATOM    877  HC  MOL     8     221.420 270.730 135.740  1.00  0.00            
ATOM    878  HC  MOL     8     222.430 269.500 136.300  1.00  0.00            
ATOM    879  CT  MOL     8     224.540 270.170 138.050  1.00  0.00            
ATOM    880  OH  MOL     8     224.370 268.810 137.780  1.00  0.00            
ATOM    881  HO  MOL     8     223.450 268.730 137.500  1.00  0.00            
ATOM    882  CT  MOL     8     225.100 270.870 136.800  1.00  0.00            
ATOM    883  HC  MOL     8     224.480 270.800 135.930  1.00  0.00            
ATOM    884  HC  MOL     8     226.090 270.470 136.550  1.00  0.00            
ATOM    885  HC  MOL     8     225.270 271.910 137.050  1.00  0.00            
ATOM    886  HC  MOL     8     225.290 270.270 138.810  1.00  0.00            
ATOM    887  HC  MOL     8     225.150 271.680 140.220  1.00  0.00            
ATOM    888  CT  MOL     8     226.140 274.470 144.700  1.00  0.00            
ATOM    889  CT  MOL     8     226.340 273.530 145.910  1.00  0.00            
ATOM    890  HC  MOL     8     226.810 272.590 145.610  1.00  0.00            
ATOM    891  HC  MOL     8     225.370 273.330 146.380  1.00  0.00            
ATOM    892  HC  MOL     8     226.980 273.980 146.650  1.00  0.00            
ATOM    893  HC  MOL     8     227.110 274.650 144.280  1.00  0.00            
ATOM    894  HC  MOL     8     225.800 275.420 145.060  1.00  0.00            
ATOM    895  HC  MOL     8     223.370 275.220 145.380  1.00  0.00            
ATOM    896  CT  MOL     8     220.920 276.560 146.500  1.00  0.00            
ATOM    897  CT  MOL     8     220.260 275.940 147.730  1.00  0.00            
ATOM    898  HC  MOL     8     220.820 275.070 147.990  1.00  0.00            
ATOM    899  HC  MOL     8     219.240 275.620 147.530  1.00  0.00            
ATOM    900  HC  MOL     8     220.270 276.610 148.580  1.00  0.00            
ATOM    901  HC  MOL     8     220.510 277.550 146.380  1.00  0.00            
ATOM    902  HC  MOL     8     221.980 276.680 146.650  1.00  0.00            
ATOM    903  O_2 MOL     8     217.310 277.120 145.410  1.00  0.00            
ATOM    904  HC  MOL     8     216.680 276.730 142.720  1.00  0.00            
ATOM    905  HC  MOL     8     216.260 275.260 143.520  1.00  0.00            
ATOM    906  CT  MOL     8     216.430 271.940 139.210  1.00  0.00            
ATOM    907  HC  MOL     8     216.770 271.140 138.590  1.00  0.00            
ATOM    908  HC  MOL     8     216.400 271.560 140.230  1.00  0.00            
ATOM    909  HC  MOL     8     215.430 272.130 138.890  1.00  0.00            
ATOM    910  HC  MOL     8     217.040 273.670 138.110  1.00  0.00            
ATOM    911  CT  MOL     8     226.970 272.760 142.080  1.00  0.00            
ATOM    912  HC  MOL     8     227.540 273.540 141.600  1.00  0.00            
ATOM    913  HC  MOL     8     227.570 272.410 142.920  1.00  0.00            
ATOM    914  HC  MOL     8     227.000 271.920 141.390  1.00  0.00            
ATOM    915  CT  MOL     8     218.990 271.600 137.200  1.00  0.00            
ATOM    916  HC  MOL     8     219.590 271.760 136.330  1.00  0.00            
ATOM    917  HC  MOL     8     218.020 272.070 136.950  1.00  0.00            
ATOM    918  HC  MOL     8     218.810 270.560 137.330  1.00  0.00            
ATOM    919  HC  MOL     8     216.000 273.810 140.850  1.00  0.00            
ATOM    920  CT  MOL     8     216.290 275.650 139.790  1.00  0.00            
ATOM    921  CT  MOL     8     214.910 275.690 139.090  1.00  0.00            
ATOM    922  HC  MOL     8     217.070 276.030 139.130  1.00  0.00            
ATOM    923  HC  MOL     8     216.250 276.380 140.580  1.00  0.00            
ATOM    924  HC  MOL     8     214.520 276.700 139.030  1.00  0.00            
ATOM    925  HC  MOL     8     215.000 275.320 138.070  1.00  0.00            
ATOM    926  C_2 MOL     8     213.780 274.950 139.800  1.00  0.00            
ATOM    927  OS  MOL     8     213.560 273.730 139.270  1.00  0.00            
ATOM    928  O_2 MOL     8     213.210 275.400 140.750  1.00  0.00            
ATOM    929  CT  MOL     8     212.470 272.900 139.750  1.00  0.00            
ATOM    930  CM  MOL     8     212.830 271.470 139.560  1.00  0.00            
ATOM    931  CM  MOL     8     212.510 270.670 138.550  1.00  0.00            
ATOM    932  CT  MOL     8     213.030 269.220 138.490  1.00  0.00            
ATOM    933  HC  MOL     8     211.560 273.160 139.220  1.00  0.00            
ATOM    934  HC  MOL     8     212.230 273.100 140.770  1.00  0.00            
ATOM    935  HC  MOL     8     213.440 271.120 140.380  1.00  0.00            
ATOM    936  HC  MOL     8     212.160 268.580 138.300  1.00  0.00            
ATOM    937  HC  MOL     8     213.670 269.060 137.620  1.00  0.00            
ATOM    938  CT  MOL     8     211.720 271.110 137.300  1.00  0.00            
ATOM    939  HC  MOL     8     211.430 272.150 137.230  1.00  0.00            
ATOM    940  HC  MOL     8     210.780 270.550 137.260  1.00  0.00            
ATOM    941  HC  MOL     8     212.260 270.810 136.420  1.00  0.00            
ATOM    942  CT  MOL     8     213.790 268.640 139.720  1.00  0.00            
ATOM    943  CM  MOL     8     214.320 267.270 139.440  1.00  0.00            
ATOM    944  CM  MOL     8     213.880 266.060 139.810  1.00  0.00            
ATOM    945  CT  MOL     8     214.710 264.820 139.440  1.00  0.00            
ATOM    946  HC  MOL     8     214.700 269.220 139.900  1.00  0.00            
ATOM    947  HC  MOL     8     213.160 268.690 140.590  1.00  0.00            
ATOM    948  HC  MOL     8     215.220 267.300 138.860  1.00  0.00            
ATOM    949  HC  MOL     8     214.810 264.220 140.330  1.00  0.00            
ATOM    950  HC  MOL     8     215.710 265.140 139.190  1.00  0.00            
ATOM    951  CT  MOL     8     212.590 265.780 140.550  1.00  0.00            
ATOM    952  HC  MOL     8     212.130 266.610 141.070  1.00  0.00            
ATOM    953  HC  MOL     8     212.700 264.980 141.270  1.00  0.00            
ATOM    954  HC  MOL     8     211.820 265.470 139.840  1.00  0.00            
ATOM    955  CT  MOL     8     214.080 264.000 138.290  1.00  0.00            
ATOM    956  CM  MOL     8     214.810 262.680 138.020  1.00  0.00            
ATOM    957  CM  MOL     8     214.510 261.430 138.390  1.00  0.00            
ATOM    958  CT  MOL     8     215.390 260.240 138.040  1.00  0.00            
ATOM    959  HC  MOL     8     213.080 263.720 138.540  1.00  0.00            
ATOM    960  HC  MOL     8     213.930 264.590 137.390  1.00  0.00            
ATOM    961  HC  MOL     8     215.700 262.800 137.460  1.00  0.00            
ATOM    962  HC  MOL     8     215.730 259.750 138.950  1.00  0.00            
ATOM    963  HC  MOL     8     216.220 260.500 137.420  1.00  0.00            
ATOM    964  HC  MOL     8     214.830 259.510 137.440  1.00  0.00            
ATOM    965  CT  MOL     8     213.290 261.020 139.210  1.00  0.00            
ATOM    966  HC  MOL     8     212.660 260.280 138.730  1.00  0.00            
ATOM    967  HC  MOL     8     212.650 261.840 139.530  1.00  0.00            
ATOM    968  HC  MOL     8     213.610 260.610 140.140  1.00  0.00            
ATOM    969  CS  MOL     9     233.470 252.020 132.890  1.00  0.00            
ATOM    970  CW  MOL     9     233.050 253.130 133.930  1.00  0.00            
ATOM    971  NA  MOL     9     231.590 253.100 134.040  1.00  0.00            
ATOM    972  CW  MOL     9     231.060 252.040 133.150  1.00  0.00            
ATOM    973  CS  MOL     9     232.270 251.330 132.480  1.00  0.00            
ATOM    974  CM  MOL     9     229.770 251.760 132.830  1.00  0.00            
ATOM    975  CW  MOL     9     228.590 252.360 133.350  1.00  0.00            
ATOM    976  CS  MOL     9     227.160 252.090 132.850  1.00  0.00            
ATOM    977  CS  MOL     9     226.240 252.880 133.680  1.00  0.00            
ATOM    978  CW  MOL     9     227.080 253.660 134.700  1.00  0.00            
ATOM    979  NA  MOL     9     228.540 253.330 134.410  1.00  0.00            
ATOM    980  CM  MOL     9     226.620 254.450 135.690  1.00  0.00            
ATOM    981  CW  MOL     9     227.430 255.170 136.570  1.00  0.00            
ATOM    982  CS  MOL     9     227.090 256.070 137.720  1.00  0.00            
ATOM    983  CS  MOL     9     228.390 256.510 138.350  1.00  0.00            
ATOM    984  CW  MOL     9     229.490 255.850 137.520  1.00  0.00            
ATOM    985  NA  MOL     9     228.940 255.030 136.490  1.00  0.00            
ATOM    986  CM  MOL     9     230.860 256.230 137.990  1.00  0.00            
ATOM    987  CT  MOL     9     230.640 257.200 139.280  1.00  0.00            
ATOM    988  C_2 MOL     9     229.000 257.370 139.480  1.00  0.00            
ATOM    989  CW  MOL     9     232.000 255.850 137.410  1.00  0.00            
ATOM    990  NA  MOL     9     232.080 255.000 136.190  1.00  0.00            
ATOM    991  CW  MOL     9     233.400 254.880 135.700  1.00  0.00            
ATOM    992  CT  MOL     9     234.410 255.810 136.580  1.00  0.00            
ATOM    993  CT  MOL     9     233.450 256.330 137.820  1.00  0.00            
ATOM    994  CM  MOL     9     233.890 254.000 134.660  1.00  0.00            
ATOM    995  MG  MOL     9     230.300 254.270 135.130  1.00  0.00            
ATOM    996  CT  MOL     9     234.840 251.790 132.290  1.00  0.00            
ATOM    997  HC  MOL     9     235.270 252.670 131.880  1.00  0.00            
ATOM    998  HC  MOL     9     235.540 251.350 132.980  1.00  0.00            
ATOM    999  HC  MOL     9     234.730 251.130 131.480  1.00  0.00            
ATOM   1000  CT  MOL     9     232.120 250.120 131.550  1.00  0.00            
ATOM   1001  OH  MOL     9     233.170 249.160 131.810  1.00  0.00            
ATOM   1002  HO  MOL     9     233.140 248.530 131.090  1.00  0.00            
ATOM   1003  CT  MOL     9     232.080 250.460 130.040  1.00  0.00            
ATOM   1004  HC  MOL     9     232.970 250.950 129.690  1.00  0.00            
ATOM   1005  HC  MOL     9     231.270 251.150 129.880  1.00  0.00            
ATOM   1006  HC  MOL     9     231.860 249.590 129.470  1.00  0.00            
ATOM   1007  HC  MOL     9     231.210 249.590 131.810  1.00  0.00            
ATOM   1008  HC  MOL     9     229.600 250.970 132.110  1.00  0.00            
ATOM   1009  CT  MOL     9     224.730 252.930 133.570  1.00  0.00            
ATOM   1010  CT  MOL     9     223.980 252.090 134.660  1.00  0.00            
ATOM   1011  HC  MOL     9     224.220 251.030 134.600  1.00  0.00            
ATOM   1012  HC  MOL     9     222.880 252.190 134.570  1.00  0.00            
ATOM   1013  HC  MOL     9     224.280 252.450 135.620  1.00  0.00            
ATOM   1014  HC  MOL     9     224.430 252.590 132.590  1.00  0.00            
ATOM   1015  HC  MOL     9     224.450 253.980 133.630  1.00  0.00            
ATOM   1016  HC  MOL     9     225.560 254.580 135.780  1.00  0.00            
ATOM   1017  CT  MOL     9     225.720 256.610 138.090  1.00  0.00            
ATOM   1018  CT  MOL     9     224.880 255.790 139.100  1.00  0.00            
ATOM   1019  HC  MOL     9     224.630 254.850 138.620  1.00  0.00            
ATOM   1020  HC  MOL     9     223.960 256.300 139.360  1.00  0.00            
ATOM   1021  HC  MOL     9     225.440 255.560 139.990  1.00  0.00            
ATOM   1022  HC  MOL     9     225.130 256.630 137.180  1.00  0.00            
ATOM   1023  HC  MOL     9     225.870 257.650 138.380  1.00  0.00            
ATOM   1024  O_2 MOL     9     228.470 258.070 140.310  1.00  0.00            
ATOM   1025  HC  MOL     9     231.040 256.800 140.200  1.00  0.00            
ATOM   1026  HC  MOL     9     231.040 258.180 139.140  1.00  0.00            
ATOM   1027  CT  MOL     9     234.850 257.020 135.740  1.00  0.00            
ATOM   1028  HC  MOL     9     235.350 256.760 134.820  1.00  0.00            
ATOM   1029  HC  MOL     9     233.990 257.620 135.470  1.00  0.00            
ATOM   1030  HC  MOL     9     235.560 257.670 136.290  1.00  0.00            
ATOM   1031  HC  MOL     9     235.280 255.310 136.970  1.00  0.00            
ATOM   1032  CT  MOL     9     226.820 251.230 131.650  1.00  0.00            
ATOM   1033  HC  MOL     9     226.720 251.840 130.760  1.00  0.00            
ATOM   1034  HC  MOL     9     227.600 250.510 131.410  1.00  0.00            
ATOM   1035  HC  MOL     9     225.910 250.660 131.800  1.00  0.00            
ATOM   1036  CT  MOL     9     235.410 253.950 134.410  1.00  0.00            
ATOM   1037  HC  MOL     9     235.640 254.230 133.390  1.00  0.00            
ATOM   1038  HC  MOL     9     235.760 252.950 134.610  1.00  0.00            
ATOM   1039  HC  MOL     9     236.060 254.610 135.000  1.00  0.00            
ATOM   1040  HC  MOL     9     233.420 257.410 137.920  1.00  0.00            
ATOM   1041  CT  MOL     9     233.870 255.780 139.210  1.00  0.00            
ATOM   1042  CT  MOL     9     234.570 256.780 140.160  1.00  0.00            
ATOM   1043  HC  MOL     9     234.420 254.840 139.140  1.00  0.00            
ATOM   1044  HC  MOL     9     232.970 255.470 139.710  1.00  0.00            
ATOM   1045  HC  MOL     9     233.930 257.630 140.340  1.00  0.00            
ATOM   1046  HC  MOL     9     234.740 256.300 141.110  1.00  0.00            
ATOM   1047  C_2 MOL     9     235.970 257.250 139.720  1.00  0.00            
ATOM   1048  OS  MOL     9     236.270 258.470 140.180  1.00  0.00            
ATOM   1049  O_2 MOL     9     236.570 256.720 138.820  1.00  0.00            
ATOM   1050  CT  MOL     9     237.450 259.190 139.710  1.00  0.00            
ATOM   1051  CM  MOL     9     237.380 260.530 140.440  1.00  0.00            
ATOM   1052  CM  MOL     9     237.380 261.780 139.990  1.00  0.00            
ATOM   1053  CT  MOL     9     237.460 262.960 140.980  1.00  0.00            
ATOM   1054  HC  MOL     9     237.440 259.270 138.610  1.00  0.00            
ATOM   1055  HC  MOL     9     238.310 258.580 140.000  1.00  0.00            
ATOM   1056  HC  MOL     9     237.450 260.310 141.510  1.00  0.00            
ATOM   1057  HC  MOL     9     236.620 263.620 140.800  1.00  0.00            
ATOM   1058  HC  MOL     9     237.310 262.550 141.990  1.00  0.00            
ATOM   1059  CT  MOL     9     237.350 262.200 138.540  1.00  0.00            
ATOM   1060  HC  MOL     9     237.210 261.370 137.860  1.00  0.00            
ATOM   1061  HC  MOL     9     238.290 262.630 138.200  1.00  0.00            
ATOM   1062  HC  MOL     9     236.590 262.970 138.380  1.00  0.00            
ATOM   1063  CT  MOL     9     238.780 263.790 140.970  1.00  0.00            
ATOM   1064  CM  MOL     9     238.700 265.050 140.160  1.00  0.00            
ATOM   1065  CM  MOL     9     239.120 266.280 140.420  1.00  0.00            
ATOM   1066  CT  MOL     9     238.870 267.430 139.400  1.00  0.00            
ATOM   1067  HC  MOL     9     238.970 264.070 141.990  1.00  0.00            
ATOM   1068  HC  MOL     9     239.640 263.170 140.700  1.00  0.00            
ATOM   1069  HC  MOL     9     238.240 264.880 139.200  1.00  0.00            
ATOM   1070  HC  MOL     9     238.390 267.070 138.480  1.00  0.00            
ATOM   1071  HC  MOL     9     239.820 267.850 139.070  1.00  0.00            
ATOM   1072  CT  MOL     9     239.800 266.690 141.700  1.00  0.00            
ATOM   1073  HC  MOL     9     240.210 265.860 142.250  1.00  0.00            
ATOM   1074  HC  MOL     9     239.150 267.260 142.380  1.00  0.00            
ATOM   1075  HC  MOL     9     240.660 267.330 141.480  1.00  0.00            
ATOM   1076  CT  MOL     9     237.960 268.580 139.930  1.00  0.00            
ATOM   1077  CM  MOL     9     237.630 269.590 138.850  1.00  0.00            
ATOM   1078  CM  MOL     9     237.940 270.870 138.770  1.00  0.00            
ATOM   1079  CT  MOL     9     237.490 271.720 137.580  1.00  0.00            
ATOM   1080  HC  MOL     9     237.020 268.160 140.240  1.00  0.00            
ATOM   1081  HC  MOL     9     238.380 269.080 140.790  1.00  0.00            
ATOM   1082  HC  MOL     9     237.050 269.140 138.060  1.00  0.00            
ATOM   1083  HC  MOL     9     236.880 272.580 137.860  1.00  0.00            
ATOM   1084  HC  MOL     9     236.930 271.100 136.900  1.00  0.00            
ATOM   1085  HC  MOL     9     238.340 272.120 137.070  1.00  0.00            
ATOM   1086  CT  MOL     9     238.800 271.660 139.720  1.00  0.00            
ATOM   1087  HC  MOL     9     239.240 271.130 140.570  1.00  0.00            
ATOM   1088  HC  MOL     9     238.190 272.460 140.140  1.00  0.00            
ATOM   1089  HC  MOL     9     239.620 272.110 139.150  1.00  0.00            
ATOM   1090  CS  MOL    10     228.110 257.880 134.360  1.00  0.00            
ATOM   1091  CW  MOL    10     227.340 258.780 135.420  1.00  0.00            
ATOM   1092  NA  MOL    10     228.370 259.400 136.290  1.00  0.00            
ATOM   1093  CW  MOL    10     229.710 258.950 135.830  1.00  0.00            
ATOM   1094  CS  MOL    10     229.520 257.920 134.680  1.00  0.00            
ATOM   1095  CM  MOL    10     230.920 259.340 136.330  1.00  0.00            
ATOM   1096  CW  MOL    10     231.190 260.280 137.380  1.00  0.00            
ATOM   1097  CS  MOL    10     232.620 260.680 137.860  1.00  0.00            
ATOM   1098  CS  MOL    10     232.450 261.580 138.990  1.00  0.00            
ATOM   1099  CW  MOL    10     230.950 261.790 139.220  1.00  0.00            
ATOM   1100  NA  MOL    10     230.230 260.990 138.160  1.00  0.00            
ATOM   1101  CM  MOL    10     230.380 262.570 140.140  1.00  0.00            
ATOM   1102  CW  MOL    10     229.020 262.740 140.330  1.00  0.00            
ATOM   1103  CS  MOL    10     228.280 263.600 141.320  1.00  0.00            
ATOM   1104  CS  MOL    10     226.810 263.380 141.060  1.00  0.00            
ATOM   1105  CW  MOL    10     226.730 262.420 139.860  1.00  0.00            
ATOM   1106  NA  MOL    10     228.030 262.040 139.420  1.00  0.00            
ATOM   1107  CM  MOL    10     225.300 262.110 139.460  1.00  0.00            
ATOM   1108  CT  MOL    10     224.390 262.950 140.500  1.00  0.00            
ATOM   1109  C_2 MOL    10     225.390 263.730 141.540  1.00  0.00            
ATOM   1110  CW  MOL    10     224.980 261.260 138.450  1.00  0.00            
ATOM   1111  NA  MOL    10     225.970 260.510 137.580  1.00  0.00            
ATOM   1112  CW  MOL    10     225.340 259.730 136.590  1.00  0.00            
ATOM   1113  CT  MOL    10     223.720 259.850 136.740  1.00  0.00            
ATOM   1114  CT  MOL    10     223.510 260.880 137.990  1.00  0.00            
ATOM   1115  CM  MOL    10     225.960 258.950 135.540  1.00  0.00            
ATOM   1116  MG  MOL    10     228.150 260.860 137.720  1.00  0.00            
ATOM   1117  CT  MOL    10     227.580 257.050 133.220  1.00  0.00            
ATOM   1118  HC  MOL    10     226.830 256.300 133.500  1.00  0.00            
ATOM   1119  HC  MOL    10     227.110 257.710 132.470  1.00  0.00            
ATOM   1120  HC  MOL    10     228.370 256.520 132.750  1.00  0.00            
ATOM   1121  CT  MOL    10     230.690 257.230 133.990  1.00  0.00            
ATOM   1122  OH  MOL    10     230.490 255.870 133.770  1.00  0.00            
ATOM   1123  HO  MOL    10     231.240 255.580 133.250  1.00  0.00            
ATOM   1124  CT  MOL    10     231.080 257.970 132.720  1.00  0.00            
ATOM   1125  HC  MOL    10     230.280 257.900 131.980  1.00  0.00            
ATOM   1126  HC  MOL    10     231.970 257.570 132.250  1.00  0.00            
ATOM   1127  HC  MOL    10     231.250 259.010 132.900  1.00  0.00            
ATOM   1128  HC  MOL    10     231.520 257.250 134.680  1.00  0.00            
ATOM   1129  HC  MOL    10     231.770 258.930 135.850  1.00  0.00            
ATOM   1130  CT  MOL    10     233.570 262.180 139.840  1.00  0.00            
ATOM   1131  CT  MOL    10     233.750 261.470 141.180  1.00  0.00            
ATOM   1132  HC  MOL    10     234.090 260.460 140.990  1.00  0.00            
ATOM   1133  HC  MOL    10     232.870 261.420 141.800  1.00  0.00            
ATOM   1134  HC  MOL    10     234.480 262.000 141.760  1.00  0.00            
ATOM   1135  HC  MOL    10     234.510 262.180 139.320  1.00  0.00            
ATOM   1136  HC  MOL    10     233.360 263.230 139.990  1.00  0.00            
ATOM   1137  HC  MOL    10     231.010 263.090 140.830  1.00  0.00            
ATOM   1138  CT  MOL    10     228.840 264.530 142.380  1.00  0.00            
ATOM   1139  CT  MOL    10     229.120 263.870 143.750  1.00  0.00            
ATOM   1140  HC  MOL    10     229.800 263.020 143.670  1.00  0.00            
ATOM   1141  HC  MOL    10     228.190 263.520 144.160  1.00  0.00            
ATOM   1142  HC  MOL    10     229.560 264.560 144.470  1.00  0.00            
ATOM   1143  HC  MOL    10     228.100 265.290 142.520  1.00  0.00            
ATOM   1144  HC  MOL    10     229.720 265.070 142.030  1.00  0.00            
ATOM   1145  O_2 MOL    10     225.000 264.400 142.470  1.00  0.00            
ATOM   1146  HC  MOL    10     223.800 263.760 140.040  1.00  0.00            
ATOM   1147  HC  MOL    10     223.680 262.320 141.010  1.00  0.00            
ATOM   1148  CT  MOL    10     223.000 258.500 137.090  1.00  0.00            
ATOM   1149  HC  MOL    10     223.130 257.730 136.360  1.00  0.00            
ATOM   1150  HC  MOL    10     223.350 258.070 138.030  1.00  0.00            
ATOM   1151  HC  MOL    10     221.940 258.680 137.210  1.00  0.00            
ATOM   1152  HC  MOL    10     223.310 260.240 135.820  1.00  0.00            
ATOM   1153  CT  MOL    10     233.890 260.190 137.250  1.00  0.00            
ATOM   1154  HC  MOL    10     234.600 261.000 137.060  1.00  0.00            
ATOM   1155  HC  MOL    10     234.400 259.490 137.910  1.00  0.00            
ATOM   1156  HC  MOL    10     233.730 259.680 136.310  1.00  0.00            
ATOM   1157  CT  MOL    10     225.050 258.280 134.510  1.00  0.00            
ATOM   1158  HC  MOL    10     225.410 258.450 133.500  1.00  0.00            
ATOM   1159  HC  MOL    10     224.020 258.620 134.450  1.00  0.00            
ATOM   1160  HC  MOL    10     225.060 257.220 134.620  1.00  0.00            
ATOM   1161  HC  MOL    10     223.040 260.380 138.840  1.00  0.00            
ATOM   1162  CT  MOL    10     222.640 262.110 137.630  1.00  0.00            
ATOM   1163  CT  MOL    10     221.140 261.850 137.220  1.00  0.00            
ATOM   1164  HC  MOL    10     223.130 262.640 136.830  1.00  0.00            
ATOM   1165  HC  MOL    10     222.650 262.760 138.480  1.00  0.00            
ATOM   1166  HC  MOL    10     220.700 262.760 136.880  1.00  0.00            
ATOM   1167  HC  MOL    10     221.090 261.170 136.400  1.00  0.00            
ATOM   1168  C_2 MOL    10     220.220 261.290 138.330  1.00  0.00            
ATOM   1169  OS  MOL    10     220.030 259.970 138.160  1.00  0.00            
ATOM   1170  O_2 MOL    10     219.700 261.950 139.170  1.00  0.00            
ATOM   1171  CT  MOL    10     218.940 259.270 138.820  1.00  0.00            
ATOM   1172  CM  MOL    10     219.320 257.830 138.990  1.00  0.00            
ATOM   1173  CM  MOL    10     218.720 256.720 138.540  1.00  0.00            
ATOM   1174  CT  MOL    10     219.250 255.360 138.950  1.00  0.00            
ATOM   1175  HC  MOL    10     218.050 259.400 138.220  1.00  0.00            
ATOM   1176  HC  MOL    10     218.680 259.720 139.780  1.00  0.00            
ATOM   1177  HC  MOL    10     220.200 257.740 139.580  1.00  0.00            
ATOM   1178  HC  MOL    10     219.150 254.720 138.090  1.00  0.00            
ATOM   1179  HC  MOL    10     220.310 255.420 139.170  1.00  0.00            
ATOM   1180  CT  MOL    10     217.480 256.700 137.700  1.00  0.00            
ATOM   1181  HC  MOL    10     217.120 257.630 137.350  1.00  0.00            
ATOM   1182  HC  MOL    10     216.640 256.180 138.150  1.00  0.00            
ATOM   1183  HC  MOL    10     217.720 256.100 136.810  1.00  0.00            
ATOM   1184  CT  MOL    10     218.570 254.780 140.200  1.00  0.00            
ATOM   1185  CM  MOL    10     218.770 253.300 140.280  1.00  0.00            
ATOM   1186  CM  MOL    10     219.180 252.500 141.280  1.00  0.00            
ATOM   1187  CT  MOL    10     219.290 251.000 141.160  1.00  0.00            
ATOM   1188  HC  MOL    10     219.020 255.260 141.100  1.00  0.00            
ATOM   1189  HC  MOL    10     217.520 255.010 140.160  1.00  0.00            
ATOM   1190  HC  MOL    10     218.510 252.820 139.340  1.00  0.00            
ATOM   1191  HC  MOL    10     218.890 250.500 142.050  1.00  0.00            
ATOM   1192  HC  MOL    10     220.310 250.680 141.080  1.00  0.00            
ATOM   1193  CT  MOL    10     219.610 253.020 142.650  1.00  0.00            
ATOM   1194  HC  MOL    10     219.510 254.100 142.830  1.00  0.00            
ATOM   1195  HC  MOL    10     220.640 252.720 142.920  1.00  0.00            
ATOM   1196  HC  MOL    10     219.030 252.590 143.470  1.00  0.00            
ATOM   1197  CT  MOL    10     218.510 250.370 139.950  1.00  0.00            
ATOM   1198  CM  MOL    10     218.440 248.840 139.970  1.00  0.00            
ATOM   1199  CM  MOL    10     218.580 247.970 138.960  1.00  0.00            
ATOM   1200  CT  MOL    10     218.470 246.470 139.210  1.00  0.00            
ATOM   1201  HC  MOL    10     217.490 250.750 140.000  1.00  0.00            
ATOM   1202  HC  MOL    10     218.900 250.770 139.040  1.00  0.00            
ATOM   1203  HC  MOL    10     218.270 248.370 140.920  1.00  0.00            
ATOM   1204  HC  MOL    10     217.680 246.010 138.610  1.00  0.00            
ATOM   1205  HC  MOL    10     218.240 246.260 140.260  1.00  0.00            
ATOM   1206  HC  MOL    10     219.430 246.000 138.980  1.00  0.00            
ATOM   1207  CT  MOL    10     218.810 248.330 137.500  1.00  0.00            
ATOM   1208  HC  MOL    10     219.750 248.030 137.080  1.00  0.00            
ATOM   1209  HC  MOL    10     218.660 249.370 137.330  1.00  0.00            
ATOM   1210  HC  MOL    10     218.060 247.880 136.900  1.00  0.00            
ATOM   1211  CS  MOL    11     241.790 240.410 130.540  1.00  0.00            
ATOM   1212  CW  MOL    11     240.960 241.430 131.420  1.00  0.00            
ATOM   1213  NA  MOL    11     239.550 240.950 131.420  1.00  0.00            
ATOM   1214  CW  MOL    11     239.440 239.710 130.610  1.00  0.00            
ATOM   1215  CS  MOL    11     240.890 239.330 130.170  1.00  0.00            
ATOM   1216  CM  MOL    11     238.320 239.030 130.260  1.00  0.00            
ATOM   1217  CW  MOL    11     236.940 239.300 130.550  1.00  0.00            
ATOM   1218  CS  MOL    11     235.740 238.440 130.090  1.00  0.00            
ATOM   1219  CS  MOL    11     234.540 239.060 130.660  1.00  0.00            
ATOM   1220  CW  MOL    11     234.980 240.260 131.500  1.00  0.00            
ATOM   1221  NA  MOL    11     236.460 240.370 131.390  1.00  0.00            
ATOM   1222  CM  MOL    11     234.170 241.050 132.260  1.00  0.00            
ATOM   1223  CW  MOL    11     234.610 242.070 133.110  1.00  0.00            
ATOM   1224  CS  MOL    11     233.890 242.930 134.130  1.00  0.00            
ATOM   1225  CS  MOL    11     234.920 243.850 134.730  1.00  0.00            
ATOM   1226  CW  MOL    11     236.270 243.440 134.140  1.00  0.00            
ATOM   1227  NA  MOL    11     236.090 242.380 133.180  1.00  0.00            
ATOM   1228  CM  MOL    11     237.390 244.250 134.660  1.00  0.00            
ATOM   1229  CT  MOL    11     236.710 245.310 135.730  1.00  0.00            
ATOM   1230  C_2 MOL    11     235.090 244.990 135.750  1.00  0.00            
ATOM   1231  CW  MOL    11     238.660 244.160 134.260  1.00  0.00            
ATOM   1232  NA  MOL    11     239.190 243.210 133.210  1.00  0.00            
ATOM   1233  CW  MOL    11     240.570 243.350 132.960  1.00  0.00            
ATOM   1234  CT  MOL    11     241.120 244.650 133.790  1.00  0.00            
ATOM   1235  CT  MOL    11     239.870 245.110 134.720  1.00  0.00            
ATOM   1236  CM  MOL    11     241.450 242.560 132.130  1.00  0.00            
ATOM   1237  MG  MOL    11     237.820 241.840 132.130  1.00  0.00            
ATOM   1238  CT  MOL    11     243.220 240.500 130.070  1.00  0.00            
ATOM   1239  HC  MOL    11     243.580 241.510 129.970  1.00  0.00            
ATOM   1240  HC  MOL    11     243.920 239.960 130.700  1.00  0.00            
ATOM   1241  HC  MOL    11     243.270 240.110 129.080  1.00  0.00            
ATOM   1242  CT  MOL    11     241.210 238.020 129.450  1.00  0.00            
ATOM   1243  OH  MOL    11     242.450 237.490 129.840  1.00  0.00            
ATOM   1244  HO  MOL    11     243.140 238.060 129.520  1.00  0.00            
ATOM   1245  CT  MOL    11     241.040 238.080 127.920  1.00  0.00            
ATOM   1246  HC  MOL    11     241.790 238.760 127.510  1.00  0.00            
ATOM   1247  HC  MOL    11     240.070 238.510 127.640  1.00  0.00            
ATOM   1248  HC  MOL    11     241.130 237.110 127.440  1.00  0.00            
ATOM   1249  HC  MOL    11     240.490 237.300 129.820  1.00  0.00            
ATOM   1250  HC  MOL    11     238.450 238.200 129.600  1.00  0.00            
ATOM   1251  CT  MOL    11     233.110 238.590 130.560  1.00  0.00            
ATOM   1252  CT  MOL    11     232.790 237.550 131.630  1.00  0.00            
ATOM   1253  HC  MOL    11     233.420 236.680 131.580  1.00  0.00            
ATOM   1254  HC  MOL    11     231.770 237.190 131.540  1.00  0.00            
ATOM   1255  HC  MOL    11     232.950 237.960 132.600  1.00  0.00            
ATOM   1256  HC  MOL    11     232.870 238.150 129.600  1.00  0.00            
ATOM   1257  HC  MOL    11     232.440 239.420 130.680  1.00  0.00            
ATOM   1258  HC  MOL    11     233.120 240.800 132.260  1.00  0.00            
ATOM   1259  CT  MOL    11     232.440 242.980 134.550  1.00  0.00            
ATOM   1260  CT  MOL    11     231.520 241.860 134.050  1.00  0.00            
ATOM   1261  HC  MOL    11     231.410 241.900 133.000  1.00  0.00            
ATOM   1262  HC  MOL    11     230.520 242.000 134.470  1.00  0.00            
ATOM   1263  HC  MOL    11     231.870 240.880 134.330  1.00  0.00            
ATOM   1264  HC  MOL    11     232.000 243.930 134.260  1.00  0.00            
ATOM   1265  HC  MOL    11     232.370 242.980 135.630  1.00  0.00            
ATOM   1266  O_2 MOL    11     234.280 245.610 136.400  1.00  0.00            
ATOM   1267  HC  MOL    11     237.050 245.130 136.730  1.00  0.00            
ATOM   1268  HC  MOL    11     236.840 246.350 135.540  1.00  0.00            
ATOM   1269  CT  MOL    11     241.500 245.790 132.760  1.00  0.00            
ATOM   1270  HC  MOL    11     242.340 245.600 132.140  1.00  0.00            
ATOM   1271  HC  MOL    11     240.640 245.980 132.100  1.00  0.00            
ATOM   1272  HC  MOL    11     241.740 246.690 133.300  1.00  0.00            
ATOM   1273  HC  MOL    11     241.950 244.420 134.390  1.00  0.00            
ATOM   1274  CT  MOL    11     235.810 237.340 129.060  1.00  0.00            
ATOM   1275  HC  MOL    11     235.150 236.540 129.270  1.00  0.00            
ATOM   1276  HC  MOL    11     235.600 237.700 128.060  1.00  0.00            
ATOM   1277  HC  MOL    11     236.790 236.900 129.060  1.00  0.00            
ATOM   1278  CT  MOL    11     242.950 242.900 132.140  1.00  0.00            
ATOM   1279  HC  MOL    11     243.290 243.460 131.270  1.00  0.00            
ATOM   1280  HC  MOL    11     243.560 242.000 132.140  1.00  0.00            
ATOM   1281  HC  MOL    11     243.290 243.480 132.970  1.00  0.00            
ATOM   1282  HC  MOL    11     239.540 246.110 134.460  1.00  0.00            
ATOM   1283  CT  MOL    11     240.170 245.000 136.230  1.00  0.00            
ATOM   1284  CT  MOL    11     240.370 246.350 136.980  1.00  0.00            
ATOM   1285  HC  MOL    11     240.980 244.310 136.420  1.00  0.00            
ATOM   1286  HC  MOL    11     239.330 244.470 136.670  1.00  0.00            
ATOM   1287  HC  MOL    11     239.540 246.960 136.780  1.00  0.00            
ATOM   1288  HC  MOL    11     240.350 246.140 138.060  1.00  0.00            
ATOM   1289  C_2 MOL    11     241.680 247.050 136.730  1.00  0.00            
ATOM   1290  OS  MOL    11     242.020 247.800 137.770  1.00  0.00            
ATOM   1291  O_2 MOL    11     242.430 246.720 135.860  1.00  0.00            
ATOM   1292  CT  MOL    11     243.330 248.430 137.890  1.00  0.00            
ATOM   1293  CM  MOL    11     243.550 248.650 139.340  1.00  0.00            
ATOM   1294  CM  MOL    11     243.940 249.720 140.020  1.00  0.00            
ATOM   1295  CT  MOL    11     244.110 249.690 141.560  1.00  0.00            
ATOM   1296  HC  MOL    11     243.350 249.280 137.240  1.00  0.00            
ATOM   1297  HC  MOL    11     244.090 247.740 137.520  1.00  0.00            
ATOM   1298  HC  MOL    11     243.410 247.700 139.830  1.00  0.00            
ATOM   1299  HC  MOL    11     245.080 250.140 141.880  1.00  0.00            
ATOM   1300  HC  MOL    11     243.370 250.370 141.960  1.00  0.00            
ATOM   1301  CT  MOL    11     244.230 251.100 139.420  1.00  0.00            
ATOM   1302  HC  MOL    11     244.150 251.200 138.340  1.00  0.00            
ATOM   1303  HC  MOL    11     245.220 251.480 139.600  1.00  0.00            
ATOM   1304  HC  MOL    11     243.610 251.900 139.830  1.00  0.00            
ATOM   1305  CT  MOL    11     243.990 248.320 142.310  1.00  0.00            
ATOM   1306  CM  MOL    11     243.880 248.440 143.820  1.00  0.00            
ATOM   1307  CM  MOL    11     244.640 247.860 144.760  1.00  0.00            
ATOM   1308  CT  MOL    11     244.240 247.950 146.230  1.00  0.00            
ATOM   1309  HC  MOL    11     243.090 247.850 141.970  1.00  0.00            
ATOM   1310  HC  MOL    11     244.800 247.670 141.980  1.00  0.00            
ATOM   1311  HC  MOL    11     243.020 249.070 144.070  1.00  0.00            
ATOM   1312  HC  MOL    11     245.000 248.490 146.790  1.00  0.00            
ATOM   1313  HC  MOL    11     244.340 246.950 146.680  1.00  0.00            
ATOM   1314  CT  MOL    11     245.900 247.070 144.510  1.00  0.00            
ATOM   1315  HC  MOL    11     246.050 246.880 143.450  1.00  0.00            
ATOM   1316  HC  MOL    11     245.890 246.100 145.010  1.00  0.00            
ATOM   1317  HC  MOL    11     246.800 247.630 144.840  1.00  0.00            
ATOM   1318  CT  MOL    11     242.810 248.470 146.550  1.00  0.00            
ATOM   1319  CM  MOL    11     242.410 248.220 147.990  1.00  0.00            
ATOM   1320  CM  MOL    11     241.640 247.220 148.430  1.00  0.00            
ATOM   1321  CT  MOL    11     241.330 247.080 149.920  1.00  0.00            
ATOM   1322  HC  MOL    11     242.800 249.540 146.430  1.00  0.00            
ATOM   1323  HC  MOL    11     242.080 248.100 145.830  1.00  0.00            
ATOM   1324  HC  MOL    11     242.820 248.960 148.690  1.00  0.00            
ATOM   1325  HC  MOL    11     240.280 246.960 150.120  1.00  0.00            
ATOM   1326  HC  MOL    11     241.620 247.930 150.540  1.00  0.00            
ATOM   1327  HC  MOL    11     241.830 246.180 150.310  1.00  0.00            
ATOM   1328  CT  MOL    11     241.040 246.100 147.590  1.00  0.00            
ATOM   1329  HC  MOL    11     241.280 246.120 146.530  1.00  0.00            
ATOM   1330  HC  MOL    11     239.960 246.020 147.710  1.00  0.00            
ATOM   1331  HC  MOL    11     241.460 245.180 147.960  1.00  0.00            
ATOM   1332  CS  MOL    12     234.430 244.780 130.790  1.00  0.00            
ATOM   1333  CW  MOL    12     233.440 245.590 131.730  1.00  0.00            
ATOM   1334  NA  MOL    12     234.250 246.530 132.460  1.00  0.00            
ATOM   1335  CW  MOL    12     235.710 246.360 132.140  1.00  0.00            
ATOM   1336  CS  MOL    12     235.770 245.180 131.130  1.00  0.00            
ATOM   1337  CM  MOL    12     236.780 247.100 132.530  1.00  0.00            
ATOM   1338  CW  MOL    12     236.790 248.210 133.450  1.00  0.00            
ATOM   1339  CS  MOL    12     238.070 248.930 133.910  1.00  0.00            
ATOM   1340  CS  MOL    12     237.670 249.880 134.950  1.00  0.00            
ATOM   1341  CW  MOL    12     236.160 249.780 135.140  1.00  0.00            
ATOM   1342  NA  MOL    12     235.650 248.720 134.160  1.00  0.00            
ATOM   1343  CM  MOL    12     235.410 250.510 135.980  1.00  0.00            
ATOM   1344  CW  MOL    12     234.040 250.450 136.090  1.00  0.00            
ATOM   1345  CS  MOL    12     233.100 251.170 137.000  1.00  0.00            
ATOM   1346  CS  MOL    12     231.710 250.620 136.700  1.00  0.00            
ATOM   1347  CW  MOL    12     231.900 249.580 135.590  1.00  0.00            
ATOM   1348  NA  MOL    12     233.280 249.480 135.210  1.00  0.00            
ATOM   1349  CM  MOL    12     230.600 248.940 135.170  1.00  0.00            
ATOM   1350  CT  MOL    12     229.460 249.650 136.110  1.00  0.00            
ATOM   1351  C_2 MOL    12     230.220 250.710 137.110  1.00  0.00            
ATOM   1352  CW  MOL    12     230.490 248.000 134.260  1.00  0.00            
ATOM   1353  NA  MOL    12     231.640 247.340 133.550  1.00  0.00            
ATOM   1354  CW  MOL    12     231.250 246.240 132.780  1.00  0.00            
ATOM   1355  CT  MOL    12     229.630 246.020 132.980  1.00  0.00            
ATOM   1356  CT  MOL    12     229.140 247.280 133.900  1.00  0.00            
ATOM   1357  CM  MOL    12     232.060 245.450 131.890  1.00  0.00            
ATOM   1358  MG  MOL    12     233.680 248.140 133.630  1.00  0.00            
ATOM   1359  CT  MOL    12     234.090 243.700 129.760  1.00  0.00            
ATOM   1360  HC  MOL    12     233.720 242.770 130.180  1.00  0.00            
ATOM   1361  HC  MOL    12     233.340 244.020 129.030  1.00  0.00            
ATOM   1362  HC  MOL    12     234.970 243.490 129.200  1.00  0.00            
ATOM   1363  CT  MOL    12     237.120 244.670 130.570  1.00  0.00            
ATOM   1364  OH  MOL    12     237.170 243.250 130.540  1.00  0.00            
ATOM   1365  HO  MOL    12     236.330 242.930 130.230  1.00  0.00            
ATOM   1366  CT  MOL    12     237.420 245.260 129.170  1.00  0.00            
ATOM   1367  HC  MOL    12     236.650 244.960 128.490  1.00  0.00            
ATOM   1368  HC  MOL    12     238.400 244.940 128.790  1.00  0.00            
ATOM   1369  HC  MOL    12     237.400 246.360 129.180  1.00  0.00            
ATOM   1370  HC  MOL    12     237.940 244.970 131.240  1.00  0.00            
ATOM   1371  HC  MOL    12     237.760 246.820 132.150  1.00  0.00            
ATOM   1372  CT  MOL    12     238.530 250.830 135.720  1.00  0.00            
ATOM   1373  CT  MOL    12     238.860 250.340 137.160  1.00  0.00            
ATOM   1374  HC  MOL    12     239.460 249.440 137.150  1.00  0.00            
ATOM   1375  HC  MOL    12     237.980 250.140 137.770  1.00  0.00            
ATOM   1376  HC  MOL    12     239.440 251.110 137.670  1.00  0.00            
ATOM   1377  HC  MOL    12     239.460 250.970 135.180  1.00  0.00            
ATOM   1378  HC  MOL    12     238.080 251.800 135.810  1.00  0.00            
ATOM   1379  HC  MOL    12     235.890 251.240 136.580  1.00  0.00            
ATOM   1380  CT  MOL    12     233.420 252.190 138.020  1.00  0.00            
ATOM   1381  CT  MOL    12     233.830 251.660 139.390  1.00  0.00            
ATOM   1382  HC  MOL    12     234.710 251.040 139.330  1.00  0.00            
ATOM   1383  HC  MOL    12     233.030 251.090 139.800  1.00  0.00            
ATOM   1384  HC  MOL    12     234.030 252.510 140.010  1.00  0.00            
ATOM   1385  HC  MOL    12     232.540 252.830 138.120  1.00  0.00            
ATOM   1386  HC  MOL    12     234.230 252.840 137.620  1.00  0.00            
ATOM   1387  O_2 MOL    12     229.650 251.440 137.870  1.00  0.00            
ATOM   1388  HC  MOL    12     228.730 250.220 135.560  1.00  0.00            
ATOM   1389  HC  MOL    12     228.900 248.980 136.760  1.00  0.00            
ATOM   1390  CT  MOL    12     229.330 244.710 133.800  1.00  0.00            
ATOM   1391  HC  MOL    12     229.720 243.800 133.370  1.00  0.00            
ATOM   1392  HC  MOL    12     229.740 244.790 134.780  1.00  0.00            
ATOM   1393  HC  MOL    12     228.260 244.570 133.900  1.00  0.00            
ATOM   1394  HC  MOL    12     229.120 245.970 132.040  1.00  0.00            
ATOM   1395  CT  MOL    12     239.440 248.720 133.320  1.00  0.00            
ATOM   1396  HC  MOL    12     239.440 248.060 132.460  1.00  0.00            
ATOM   1397  HC  MOL    12     239.900 249.650 133.010  1.00  0.00            
ATOM   1398  HC  MOL    12     240.110 248.300 134.060  1.00  0.00            
ATOM   1399  CT  MOL    12     231.320 244.430 131.020  1.00  0.00            
ATOM   1400  HC  MOL    12     231.490 244.560 129.970  1.00  0.00            
ATOM   1401  HC  MOL    12     230.240 244.360 131.160  1.00  0.00            
ATOM   1402  HC  MOL    12     231.690 243.440 131.210  1.00  0.00            
ATOM   1403  HC  MOL    12     228.690 246.950 134.810  1.00  0.00            
ATOM   1404  CT  MOL    12     228.150 248.230 133.150  1.00  0.00            
ATOM   1405  CT  MOL    12     226.680 247.790 133.150  1.00  0.00            
ATOM   1406  HC  MOL    12     228.470 248.360 132.120  1.00  0.00            
ATOM   1407  HC  MOL    12     228.160 249.200 133.610  1.00  0.00            
ATOM   1408  HC  MOL    12     226.140 248.260 132.330  1.00  0.00            
ATOM   1409  HC  MOL    12     226.650 246.750 132.980  1.00  0.00            
ATOM   1410  C_2 MOL    12     225.960 248.050 134.450  1.00  0.00            
ATOM   1411  OS  MOL    12     225.160 247.030 134.780  1.00  0.00            
ATOM   1412  O_2 MOL    12     226.180 248.960 135.190  1.00  0.00            
ATOM   1413  CT  MOL    12     224.520 246.990 136.060  1.00  0.00            
ATOM   1414  CM  MOL    12     224.280 245.530 136.410  1.00  0.00            
ATOM   1415  CM  MOL    12     223.140 244.870 136.720  1.00  0.00            
ATOM   1416  CT  MOL    12     223.200 243.400 137.090  1.00  0.00            
ATOM   1417  HC  MOL    12     223.630 247.610 135.970  1.00  0.00            
ATOM   1418  HC  MOL    12     225.160 247.470 136.780  1.00  0.00            
ATOM   1419  HC  MOL    12     225.220 245.010 136.480  1.00  0.00            
ATOM   1420  HC  MOL    12     222.560 242.870 136.400  1.00  0.00            
ATOM   1421  HC  MOL    12     224.220 243.050 136.960  1.00  0.00            
ATOM   1422  CT  MOL    12     221.760 245.460 136.750  1.00  0.00            
ATOM   1423  HC  MOL    12     221.670 246.360 136.170  1.00  0.00            
ATOM   1424  HC  MOL    12     221.500 245.680 137.750  1.00  0.00            
ATOM   1425  HC  MOL    12     221.060 244.740 136.350  1.00  0.00            
ATOM   1426  CT  MOL    12     222.780 243.080 138.530  1.00  0.00            
ATOM   1427  CM  MOL    12     222.880 241.610 138.830  1.00  0.00            
ATOM   1428  CM  MOL    12     223.250 240.970 139.930  1.00  0.00            
ATOM   1429  CT  MOL    12     223.300 239.470 139.970  1.00  0.00            
ATOM   1430  HC  MOL    12     223.390 243.650 139.210  1.00  0.00            
ATOM   1431  HC  MOL    12     221.760 243.410 138.750  1.00  0.00            
ATOM   1432  HC  MOL    12     222.600 240.960 137.980  1.00  0.00            
ATOM   1433  HC  MOL    12     224.240 239.110 140.340  1.00  0.00            
ATOM   1434  HC  MOL    12     223.200 239.100 138.950  1.00  0.00            
ATOM   1435  CT  MOL    12     223.710 241.650 141.230  1.00  0.00            
ATOM   1436  HC  MOL    12     223.610 242.710 141.290  1.00  0.00            
ATOM   1437  HC  MOL    12     224.740 241.370 141.420  1.00  0.00            
ATOM   1438  HC  MOL    12     223.120 241.240 142.050  1.00  0.00            
ATOM   1439  CT  MOL    12     222.210 238.780 140.850  1.00  0.00            
ATOM   1440  CM  MOL    12     222.200 237.250 140.730  1.00  0.00            
ATOM   1441  CM  MOL    12     221.220 236.410 140.410  1.00  0.00            
ATOM   1442  CT  MOL    12     221.440 234.900 140.360  1.00  0.00            
ATOM   1443  HC  MOL    12     222.410 239.040 141.890  1.00  0.00            
ATOM   1444  HC  MOL    12     221.240 239.230 140.640  1.00  0.00            
ATOM   1445  HC  MOL    12     223.160 236.810 140.970  1.00  0.00            
ATOM   1446  HC  MOL    12     220.970 234.400 141.200  1.00  0.00            
ATOM   1447  HC  MOL    12     222.490 234.660 140.380  1.00  0.00            
ATOM   1448  HC  MOL    12     221.010 234.400 139.490  1.00  0.00            
ATOM   1449  CT  MOL    12     219.800 236.780 140.050  1.00  0.00            
ATOM   1450  HC  MOL    12     219.480 236.440 139.060  1.00  0.00            
ATOM   1451  HC  MOL    12     219.650 237.860 140.070  1.00  0.00            
ATOM   1452  HC  MOL    12     219.100 236.400 140.790  1.00  0.00            
ATOM   1453  CS  MOL    13     252.080 230.990 130.970  1.00  0.00            
ATOM   1454  CW  MOL    13     250.760 231.590 131.600  1.00  0.00            
ATOM   1455  NA  MOL    13     249.690 230.670 131.300  1.00  0.00            
ATOM   1456  CW  MOL    13     250.240 229.480 130.550  1.00  0.00            
ATOM   1457  CS  MOL    13     251.770 229.690 130.450  1.00  0.00            
ATOM   1458  CM  MOL    13     249.590 228.440 129.990  1.00  0.00            
ATOM   1459  CW  MOL    13     248.190 228.160 130.050  1.00  0.00            
ATOM   1460  CS  MOL    13     247.490 226.960 129.350  1.00  0.00            
ATOM   1461  CS  MOL    13     246.080 227.040 129.700  1.00  0.00            
ATOM   1462  CW  MOL    13     245.870 228.240 130.630  1.00  0.00            
ATOM   1463  NA  MOL    13     247.210 228.920 130.790  1.00  0.00            
ATOM   1464  CM  MOL    13     244.710 228.580 131.280  1.00  0.00            
ATOM   1465  CW  MOL    13     244.570 229.690 132.130  1.00  0.00            
ATOM   1466  CS  MOL    13     243.380 230.160 132.910  1.00  0.00            
ATOM   1467  CS  MOL    13     243.760 231.500 133.490  1.00  0.00            
ATOM   1468  CW  MOL    13     245.250 231.730 133.100  1.00  0.00            
ATOM   1469  NA  MOL    13     245.730 230.650 132.310  1.00  0.00            
ATOM   1470  CM  MOL    13     245.780 233.010 133.660  1.00  0.00            
ATOM   1471  CT  MOL    13     244.490 233.690 134.440  1.00  0.00            
ATOM   1472  C_2 MOL    13     243.210 232.680 134.330  1.00  0.00            
ATOM   1473  CW  MOL    13     247.030 233.430 133.540  1.00  0.00            
ATOM   1474  NA  MOL    13     248.080 232.650 132.800  1.00  0.00            
ATOM   1475  CW  MOL    13     249.350 233.260 132.820  1.00  0.00            
ATOM   1476  CT  MOL    13     249.250 234.690 133.590  1.00  0.00            
ATOM   1477  CT  MOL    13     247.670 234.790 134.030  1.00  0.00            
ATOM   1478  CM  MOL    13     250.620 232.800 132.320  1.00  0.00            
ATOM   1479  MG  MOL    13     247.660 230.840 131.580  1.00  0.00            
ATOM   1480  CT  MOL    13     253.460 231.630 130.820  1.00  0.00            
ATOM   1481  HC  MOL    13     253.330 232.700 130.660  1.00  0.00            
ATOM   1482  HC  MOL    13     254.050 231.430 131.700  1.00  0.00            
ATOM   1483  HC  MOL    13     253.940 231.270 129.950  1.00  0.00            
ATOM   1484  CT  MOL    13     252.720 228.640 129.850  1.00  0.00            
ATOM   1485  OH  MOL    13     253.940 228.530 130.580  1.00  0.00            
ATOM   1486  HO  MOL    13     254.400 229.370 130.620  1.00  0.00            
ATOM   1487  CT  MOL    13     252.950 228.880 128.360  1.00  0.00            
ATOM   1488  HC  MOL    13     253.520 229.790 128.150  1.00  0.00            
ATOM   1489  HC  MOL    13     252.010 228.990 127.830  1.00  0.00            
ATOM   1490  HC  MOL    13     253.470 228.060 127.830  1.00  0.00            
ATOM   1491  HC  MOL    13     252.240 227.670 129.940  1.00  0.00            
ATOM   1492  HC  MOL    13     250.110 227.710 129.450  1.00  0.00            
ATOM   1493  CT  MOL    13     244.950 226.160 129.210  1.00  0.00            
ATOM   1494  CT  MOL    13     244.540 225.020 130.180  1.00  0.00            
ATOM   1495  HC  MOL    13     245.360 224.330 130.390  1.00  0.00            
ATOM   1496  HC  MOL    13     243.740 224.460 129.720  1.00  0.00            
ATOM   1497  HC  MOL    13     244.180 225.400 131.110  1.00  0.00            
ATOM   1498  HC  MOL    13     245.220 225.730 128.270  1.00  0.00            
ATOM   1499  HC  MOL    13     244.080 226.780 129.020  1.00  0.00            
ATOM   1500  HC  MOL    13     243.850 227.980 131.120  1.00  0.00            
ATOM   1501  CT  MOL    13     242.040 229.470 133.020  1.00  0.00            
ATOM   1502  CT  MOL    13     242.170 228.180 133.800  1.00  0.00            
ATOM   1503  HC  MOL    13     242.830 227.480 133.270  1.00  0.00            
ATOM   1504  HC  MOL    13     241.200 227.740 133.920  1.00  0.00            
ATOM   1505  HC  MOL    13     242.570 228.310 134.810  1.00  0.00            
ATOM   1506  HC  MOL    13     241.650 229.280 132.020  1.00  0.00            
ATOM   1507  HC  MOL    13     241.310 230.100 133.550  1.00  0.00            
ATOM   1508  O_2 MOL    13     242.130 232.880 134.800  1.00  0.00            
ATOM   1509  HC  MOL    13     244.610 233.860 135.500  1.00  0.00            
ATOM   1510  HC  MOL    13     244.240 234.650 134.020  1.00  0.00            
ATOM   1511  CT  MOL    13     249.600 235.880 132.630  1.00  0.00            
ATOM   1512  HC  MOL    13     250.650 235.920 132.330  1.00  0.00            
ATOM   1513  HC  MOL    13     249.040 235.770 131.740  1.00  0.00            
ATOM   1514  HC  MOL    13     249.350 236.840 133.110  1.00  0.00            
ATOM   1515  HC  MOL    13     249.880 234.670 134.450  1.00  0.00            
ATOM   1516  CT  MOL    13     248.140 226.030 128.380  1.00  0.00            
ATOM   1517  HC  MOL    13     247.960 226.370 127.350  1.00  0.00            
ATOM   1518  HC  MOL    13     249.220 225.950 128.460  1.00  0.00            
ATOM   1519  HC  MOL    13     247.760 225.020 128.470  1.00  0.00            
ATOM   1520  CT  MOL    13     251.880 233.630 132.590  1.00  0.00            
ATOM   1521  HC  MOL    13     252.130 234.250 131.770  1.00  0.00            
ATOM   1522  HC  MOL    13     252.740 233.020 132.840  1.00  0.00            
ATOM   1523  HC  MOL    13     251.820 234.270 133.440  1.00  0.00            
ATOM   1524  HC  MOL    13     247.220 235.630 133.540  1.00  0.00            
ATOM   1525  CT  MOL    13     247.460 235.070 135.570  1.00  0.00            
ATOM   1526  CT  MOL    13     247.440 236.570 136.000  1.00  0.00            
ATOM   1527  HC  MOL    13     248.240 234.510 136.130  1.00  0.00            
ATOM   1528  HC  MOL    13     246.550 234.650 135.890  1.00  0.00            
ATOM   1529  HC  MOL    13     246.830 237.150 135.330  1.00  0.00            
ATOM   1530  HC  MOL    13     246.980 236.590 136.990  1.00  0.00            
ATOM   1531  C_2 MOL    13     248.810 237.220 136.190  1.00  0.00            
ATOM   1532  OS  MOL    13     248.760 238.290 136.990  1.00  0.00            
ATOM   1533  O_2 MOL    13     249.830 236.770 135.790  1.00  0.00            
ATOM   1534  CT  MOL    13     249.940 239.050 137.300  1.00  0.00            
ATOM   1535  CM  MOL    13     249.620 239.790 138.550  1.00  0.00            
ATOM   1536  CM  MOL    13     249.480 241.090 138.790  1.00  0.00            
ATOM   1537  CT  MOL    13     248.950 241.570 140.130  1.00  0.00            
ATOM   1538  HC  MOL    13     250.190 239.670 136.480  1.00  0.00            
ATOM   1539  HC  MOL    13     250.780 238.410 137.450  1.00  0.00            
ATOM   1540  HC  MOL    13     249.380 239.080 139.340  1.00  0.00            
ATOM   1541  HC  MOL    13     248.070 242.150 139.950  1.00  0.00            
ATOM   1542  HC  MOL    13     248.670 240.750 140.790  1.00  0.00            
ATOM   1543  CT  MOL    13     249.650 242.200 137.760  1.00  0.00            
ATOM   1544  HC  MOL    13     250.040 241.830 136.830  1.00  0.00            
ATOM   1545  HC  MOL    13     250.360 242.990 138.090  1.00  0.00            
ATOM   1546  HC  MOL    13     248.670 242.650 137.600  1.00  0.00            
ATOM   1547  CT  MOL    13     249.880 242.480 140.950  1.00  0.00            
ATOM   1548  CM  MOL    13     249.270 242.780 142.310  1.00  0.00            
ATOM   1549  CM  MOL    13     248.820 243.900 142.860  1.00  0.00            
ATOM   1550  CT  MOL    13     248.090 243.850 144.180  1.00  0.00            
ATOM   1551  HC  MOL    13     250.830 242.020 141.040  1.00  0.00            
ATOM   1552  HC  MOL    13     250.080 243.390 140.370  1.00  0.00            
ATOM   1553  HC  MOL    13     249.160 241.890 142.920  1.00  0.00            
ATOM   1554  HC  MOL    13     247.840 242.820 144.450  1.00  0.00            
ATOM   1555  HC  MOL    13     247.110 244.310 144.070  1.00  0.00            
ATOM   1556  CT  MOL    13     248.700 245.240 142.140  1.00  0.00            
ATOM   1557  HC  MOL    13     249.260 245.250 141.190  1.00  0.00            
ATOM   1558  HC  MOL    13     249.080 246.050 142.750  1.00  0.00            
ATOM   1559  HC  MOL    13     247.650 245.490 141.940  1.00  0.00            
ATOM   1560  CT  MOL    13     248.810 244.520 145.350  1.00  0.00            
ATOM   1561  CM  MOL    13     248.110 244.370 146.640  1.00  0.00            
ATOM   1562  CM  MOL    13     247.790 245.250 147.570  1.00  0.00            
ATOM   1563  CT  MOL    13     247.060 244.860 148.840  1.00  0.00            
ATOM   1564  HC  MOL    13     249.790 244.020 145.390  1.00  0.00            
ATOM   1565  HC  MOL    13     249.040 245.540 145.090  1.00  0.00            
ATOM   1566  HC  MOL    13     247.900 243.330 146.920  1.00  0.00            
ATOM   1567  HC  MOL    13     247.640 245.090 149.740  1.00  0.00            
ATOM   1568  HC  MOL    13     246.810 243.810 148.840  1.00  0.00            
ATOM   1569  HC  MOL    13     246.170 245.450 148.960  1.00  0.00            
ATOM   1570  CT  MOL    13     247.920 246.740 147.460  1.00  0.00            
ATOM   1571  HC  MOL    13     248.350 247.070 146.530  1.00  0.00            
ATOM   1572  HC  MOL    13     248.550 247.150 148.230  1.00  0.00            
ATOM   1573  HC  MOL    13     246.930 247.180 147.550  1.00  0.00            
ATOM   1574  CS  MOL    14     244.730 232.750 129.540  1.00  0.00            
ATOM   1575  CW  MOL    14     243.480 233.470 130.210  1.00  0.00            
ATOM   1576  NA  MOL    14     243.960 234.750 130.770  1.00  0.00            
ATOM   1577  CW  MOL    14     245.390 234.920 130.430  1.00  0.00            
ATOM   1578  CS  MOL    14     245.870 233.630 129.690  1.00  0.00            
ATOM   1579  CM  MOL    14     246.170 236.000 130.700  1.00  0.00            
ATOM   1580  CW  MOL    14     245.830 237.180 131.450  1.00  0.00            
ATOM   1581  CS  MOL    14     246.800 238.340 131.690  1.00  0.00            
ATOM   1582  CS  MOL    14     246.130 239.280 132.610  1.00  0.00            
ATOM   1583  CW  MOL    14     244.720 238.730 132.890  1.00  0.00            
ATOM   1584  NA  MOL    14     244.580 237.420 132.130  1.00  0.00            
ATOM   1585  CM  MOL    14     243.770 239.310 133.650  1.00  0.00            
ATOM   1586  CW  MOL    14     242.450 238.860 133.750  1.00  0.00            
ATOM   1587  CS  MOL    14     241.270 239.450 134.460  1.00  0.00            
ATOM   1588  CS  MOL    14     240.060 238.580 134.120  1.00  0.00            
ATOM   1589  CW  MOL    14     240.600 237.490 133.210  1.00  0.00            
ATOM   1590  NA  MOL    14     242.020 237.620 132.990  1.00  0.00            
ATOM   1591  CM  MOL    14     239.520 236.490 132.810  1.00  0.00            
ATOM   1592  CT  MOL    14     238.150 237.080 133.520  1.00  0.00            
ATOM   1593  C_2 MOL    14     238.530 238.420 134.350  1.00  0.00            
ATOM   1594  CW  MOL    14     239.790 235.390 132.120  1.00  0.00            
ATOM   1595  NA  MOL    14     241.130 234.950 131.610  1.00  0.00            
ATOM   1596  CW  MOL    14     241.100 233.700 130.980  1.00  0.00            
ATOM   1597  CT  MOL    14     239.590 233.100 131.100  1.00  0.00            
ATOM   1598  CT  MOL    14     238.720 234.270 131.810  1.00  0.00            
ATOM   1599  CM  MOL    14     242.160 233.000 130.310  1.00  0.00            
ATOM   1600  MG  MOL    14     242.870 236.290 131.620  1.00  0.00            
ATOM   1601  CT  MOL    14     244.800 231.390 128.840  1.00  0.00            
ATOM   1602  HC  MOL    14     244.180 230.650 129.320  1.00  0.00            
ATOM   1603  HC  MOL    14     244.460 231.470 127.800  1.00  0.00            
ATOM   1604  HC  MOL    14     245.790 230.980 128.860  1.00  0.00            
ATOM   1605  CT  MOL    14     247.320 233.390 129.310  1.00  0.00            
ATOM   1606  OH  MOL    14     247.790 232.140 129.790  1.00  0.00            
ATOM   1607  HO  MOL    14     248.720 232.070 129.560  1.00  0.00            
ATOM   1608  CT  MOL    14     247.580 233.560 127.820  1.00  0.00            
ATOM   1609  HC  MOL    14     246.970 232.880 127.240  1.00  0.00            
ATOM   1610  HC  MOL    14     248.640 233.370 127.560  1.00  0.00            
ATOM   1611  HC  MOL    14     247.400 234.560 127.490  1.00  0.00            
ATOM   1612  HC  MOL    14     247.980 234.100 129.840  1.00  0.00            
ATOM   1613  HC  MOL    14     247.140 235.950 130.310  1.00  0.00            
ATOM   1614  CT  MOL    14     246.730 240.560 133.170  1.00  0.00            
ATOM   1615  CT  MOL    14     247.530 240.290 134.450  1.00  0.00            
ATOM   1616  HC  MOL    14     248.380 239.660 134.330  1.00  0.00            
ATOM   1617  HC  MOL    14     246.880 239.850 135.170  1.00  0.00            
ATOM   1618  HC  MOL    14     247.820 241.240 134.870  1.00  0.00            
ATOM   1619  HC  MOL    14     247.380 240.980 132.440  1.00  0.00            
ATOM   1620  HC  MOL    14     245.930 241.310 133.330  1.00  0.00            
ATOM   1621  HC  MOL    14     244.020 240.260 134.140  1.00  0.00            
ATOM   1622  CT  MOL    14     241.230 240.680 135.320  1.00  0.00            
ATOM   1623  CT  MOL    14     241.020 240.330 136.810  1.00  0.00            
ATOM   1624  HC  MOL    14     241.750 239.620 137.180  1.00  0.00            
ATOM   1625  HC  MOL    14     240.050 239.860 136.970  1.00  0.00            
ATOM   1626  HC  MOL    14     241.060 241.230 137.420  1.00  0.00            
ATOM   1627  HC  MOL    14     240.460 241.380 134.960  1.00  0.00            
ATOM   1628  HC  MOL    14     242.150 241.260 135.240  1.00  0.00            
ATOM   1629  O_2 MOL    14     237.780 239.090 134.990  1.00  0.00            
ATOM   1630  HC  MOL    14     237.400 237.350 132.790  1.00  0.00            
ATOM   1631  HC  MOL    14     237.660 236.380 134.190  1.00  0.00            
ATOM   1632  CT  MOL    14     239.550 231.870 132.030  1.00  0.00            
ATOM   1633  HC  MOL    14     240.170 231.050 131.730  1.00  0.00            
ATOM   1634  HC  MOL    14     239.850 232.170 133.040  1.00  0.00            
ATOM   1635  HC  MOL    14     238.520 231.520 132.100  1.00  0.00            
ATOM   1636  HC  MOL    14     239.180 232.830 130.150  1.00  0.00            
ATOM   1637  CT  MOL    14     248.160 238.510 131.070  1.00  0.00            
ATOM   1638  HC  MOL    14     248.910 238.790 131.780  1.00  0.00            
ATOM   1639  HC  MOL    14     248.530 237.650 130.530  1.00  0.00            
ATOM   1640  HC  MOL    14     248.120 239.340 130.380  1.00  0.00            
ATOM   1641  CT  MOL    14     241.760 231.650 129.660  1.00  0.00            
ATOM   1642  HC  MOL    14     242.190 231.570 128.680  1.00  0.00            
ATOM   1643  HC  MOL    14     240.720 231.430 129.460  1.00  0.00            
ATOM   1644  HC  MOL    14     242.160 230.810 130.180  1.00  0.00            
ATOM   1645  HC  MOL    14     238.270 233.930 132.730  1.00  0.00            
ATOM   1646  CT  MOL    14     237.610 234.840 130.900  1.00  0.00            
ATOM   1647  CT  MOL    14     236.460 233.880 130.550  1.00  0.00            
ATOM   1648  HC  MOL    14     238.060 235.270 130.020  1.00  0.00            
ATOM   1649  HC  MOL    14     237.140 235.670 131.380  1.00  0.00            
ATOM   1650  HC  MOL    14     235.890 234.400 129.810  1.00  0.00            
ATOM   1651  HC  MOL    14     236.870 232.980 130.070  1.00  0.00            
ATOM   1652  C_2 MOL    14     235.580 233.420 131.700  1.00  0.00            
ATOM   1653  OS  MOL    14     236.100 232.320 132.270  1.00  0.00            
ATOM   1654  O_2 MOL    14     234.440 233.780 131.900  1.00  0.00            
ATOM   1655  CT  MOL    14     235.280 231.440 133.090  1.00  0.00            
ATOM   1656  CM  MOL    14     236.220 230.330 133.530  1.00  0.00            
ATOM   1657  CM  MOL    14     236.470 229.180 132.930  1.00  0.00            
ATOM   1658  CT  MOL    14     237.540 228.240 133.460  1.00  0.00            
ATOM   1659  HC  MOL    14     234.430 231.100 132.510  1.00  0.00            
ATOM   1660  HC  MOL    14     234.920 232.010 133.930  1.00  0.00            
ATOM   1661  HC  MOL    14     236.710 230.580 134.460  1.00  0.00            
ATOM   1662  HC  MOL    14     238.270 228.110 132.670  1.00  0.00            
ATOM   1663  HC  MOL    14     238.080 228.780 134.240  1.00  0.00            
ATOM   1664  CT  MOL    14     235.900 228.770 131.570  1.00  0.00            
ATOM   1665  HC  MOL    14     235.170 229.430 131.140  1.00  0.00            
ATOM   1666  HC  MOL    14     235.410 227.820 131.660  1.00  0.00            
ATOM   1667  HC  MOL    14     236.700 228.680 130.820  1.00  0.00            
ATOM   1668  CT  MOL    14     237.000 226.870 134.000  1.00  0.00            
ATOM   1669  CM  MOL    14     238.090 225.830 134.240  1.00  0.00            
ATOM   1670  CM  MOL    14     238.340 224.650 133.700  1.00  0.00            
ATOM   1671  CT  MOL    14     239.530 223.850 134.220  1.00  0.00            
ATOM   1672  HC  MOL    14     236.490 227.090 134.940  1.00  0.00            
ATOM   1673  HC  MOL    14     236.250 226.530 133.320  1.00  0.00            
ATOM   1674  HC  MOL    14     238.780 226.170 134.970  1.00  0.00            
ATOM   1675  HC  MOL    14     239.280 222.820 134.380  1.00  0.00            
ATOM   1676  HC  MOL    14     239.840 224.250 135.180  1.00  0.00            
ATOM   1677  CT  MOL    14     237.540 223.920 132.640  1.00  0.00            
ATOM   1678  HC  MOL    14     236.700 224.530 132.290  1.00  0.00            
ATOM   1679  HC  MOL    14     237.150 222.980 133.020  1.00  0.00            
ATOM   1680  HC  MOL    14     238.170 223.670 131.800  1.00  0.00            
ATOM   1681  CT  MOL    14     240.760 223.890 133.250  1.00  0.00            
ATOM   1682  CM  MOL    14     241.870 222.970 133.720  1.00  0.00            
ATOM   1683  CM  MOL    14     243.160 223.190 133.940  1.00  0.00            
ATOM   1684  CT  MOL    14     244.080 222.050 134.320  1.00  0.00            
ATOM   1685  HC  MOL    14     240.440 223.500 132.280  1.00  0.00            
ATOM   1686  HC  MOL    14     241.050 224.910 133.130  1.00  0.00            
ATOM   1687  HC  MOL    14     241.490 221.970 133.830  1.00  0.00            
ATOM   1688  HC  MOL    14     244.940 222.020 133.660  1.00  0.00            
ATOM   1689  HC  MOL    14     243.600 221.090 134.300  1.00  0.00            
ATOM   1690  HC  MOL    14     244.500 222.170 135.330  1.00  0.00            
ATOM   1691  CT  MOL    14     243.880 224.520 133.860  1.00  0.00            
ATOM   1692  HC  MOL    14     244.680 224.510 133.150  1.00  0.00            
ATOM   1693  HC  MOL    14     244.260 224.800 134.840  1.00  0.00            
ATOM   1694  HC  MOL    14     243.220 225.340 133.580  1.00  0.00            
ATOM   1695  CS  MOL    15     265.240 223.050 131.840  1.00  0.00            
ATOM   1696  CW  MOL    15     263.880 223.670 132.370  1.00  0.00            
ATOM   1697  NA  MOL    15     262.820 222.660 132.170  1.00  0.00            
ATOM   1698  CW  MOL    15     263.440 221.460 131.530  1.00  0.00            
ATOM   1699  CS  MOL    15     264.970 221.720 131.380  1.00  0.00            
ATOM   1700  CM  MOL    15     262.790 220.360 131.060  1.00  0.00            
ATOM   1701  CW  MOL    15     261.390 220.110 131.110  1.00  0.00            
ATOM   1702  CS  MOL    15     260.710 218.880 130.470  1.00  0.00            
ATOM   1703  CS  MOL    15     259.320 218.910 130.820  1.00  0.00            
ATOM   1704  CW  MOL    15     259.060 220.170 131.680  1.00  0.00            
ATOM   1705  NA  MOL    15     260.390 220.910 131.760  1.00  0.00            
ATOM   1706  CM  MOL    15     257.890 220.570 132.310  1.00  0.00            
ATOM   1707  CW  MOL    15     257.760 221.730 133.090  1.00  0.00            
ATOM   1708  CS  MOL    15     256.540 222.270 133.750  1.00  0.00            
ATOM   1709  CS  MOL    15     256.920 223.600 134.360  1.00  0.00            
ATOM   1710  CW  MOL    15     258.390 223.800 134.020  1.00  0.00            
ATOM   1711  NA  MOL    15     258.900 222.680 133.300  1.00  0.00            
ATOM   1712  CM  MOL    15     258.930 225.150 134.460  1.00  0.00            
ATOM   1713  CT  MOL    15     257.680 225.840 135.200  1.00  0.00            
ATOM   1714  C_2 MOL    15     256.380 224.830 135.150  1.00  0.00            
ATOM   1715  CW  MOL    15     260.180 225.540 134.230  1.00  0.00            
ATOM   1716  NA  MOL    15     261.200 224.760 133.470  1.00  0.00            
ATOM   1717  CW  MOL    15     262.430 225.460 133.360  1.00  0.00            
ATOM   1718  CT  MOL    15     262.260 226.960 134.000  1.00  0.00            
ATOM   1719  CT  MOL    15     260.760 226.940 134.650  1.00  0.00            
ATOM   1720  CM  MOL    15     263.710 224.960 132.920  1.00  0.00            
ATOM   1721  MG  MOL    15     260.790 222.880 132.410  1.00  0.00            
ATOM   1722  CT  MOL    15     266.590 223.710 131.660  1.00  0.00            
ATOM   1723  HC  MOL    15     266.490 224.640 131.060  1.00  0.00            
ATOM   1724  HC  MOL    15     267.120 223.950 132.580  1.00  0.00            
ATOM   1725  HC  MOL    15     267.200 223.020 131.120  1.00  0.00            
ATOM   1726  CT  MOL    15     265.940 220.630 130.860  1.00  0.00            
ATOM   1727  OH  MOL    15     267.150 220.590 131.610  1.00  0.00            
ATOM   1728  HO  MOL    15     267.830 220.110 131.140  1.00  0.00            
ATOM   1729  CT  MOL    15     266.260 220.760 129.350  1.00  0.00            
ATOM   1730  HC  MOL    15     266.760 221.710 129.120  1.00  0.00            
ATOM   1731  HC  MOL    15     265.340 220.750 128.780  1.00  0.00            
ATOM   1732  HC  MOL    15     266.830 219.940 128.940  1.00  0.00            
ATOM   1733  HC  MOL    15     265.460 219.650 131.050  1.00  0.00            
ATOM   1734  HC  MOL    15     263.360 219.630 130.560  1.00  0.00            
ATOM   1735  CT  MOL    15     258.210 218.000 130.380  1.00  0.00            
ATOM   1736  CT  MOL    15     258.170 216.620 131.040  1.00  0.00            
ATOM   1737  HC  MOL    15     259.170 216.130 131.020  1.00  0.00            
ATOM   1738  HC  MOL    15     257.460 215.990 130.490  1.00  0.00            
ATOM   1739  HC  MOL    15     257.860 216.730 132.090  1.00  0.00            
ATOM   1740  HC  MOL    15     258.370 217.940 129.320  1.00  0.00            
ATOM   1741  HC  MOL    15     257.240 218.480 130.460  1.00  0.00            
ATOM   1742  HC  MOL    15     257.030 219.940 132.220  1.00  0.00            
ATOM   1743  CT  MOL    15     255.150 221.700 133.820  1.00  0.00            
ATOM   1744  CT  MOL    15     254.610 221.450 135.220  1.00  0.00            
ATOM   1745  HC  MOL    15     255.200 220.680 135.720  1.00  0.00            
ATOM   1746  HC  MOL    15     253.560 221.120 135.190  1.00  0.00            
ATOM   1747  HC  MOL    15     254.700 222.350 135.850  1.00  0.00            
ATOM   1748  HC  MOL    15     255.060 220.830 133.150  1.00  0.00            
ATOM   1749  HC  MOL    15     254.500 222.480 133.440  1.00  0.00            
ATOM   1750  O_2 MOL    15     255.320 225.060 135.590  1.00  0.00            
ATOM   1751  HC  MOL    15     257.860 225.990 136.250  1.00  0.00            
ATOM   1752  HC  MOL    15     257.360 226.770 134.750  1.00  0.00            
ATOM   1753  CT  MOL    15     262.360 227.980 132.860  1.00  0.00            
ATOM   1754  HC  MOL    15     263.270 227.970 132.290  1.00  0.00            
ATOM   1755  HC  MOL    15     261.580 227.680 132.180  1.00  0.00            
ATOM   1756  HC  MOL    15     262.200 229.000 133.180  1.00  0.00            
ATOM   1757  HC  MOL    15     263.000 227.180 134.750  1.00  0.00            
ATOM   1758  CT  MOL    15     261.390 217.870 129.580  1.00  0.00            
ATOM   1759  HC  MOL    15     262.060 217.250 130.150  1.00  0.00            
ATOM   1760  HC  MOL    15     260.700 217.170 129.060  1.00  0.00            
ATOM   1761  HC  MOL    15     262.020 218.380 128.850  1.00  0.00            
ATOM   1762  CT  MOL    15     264.930 225.910 133.040  1.00  0.00            
ATOM   1763  HC  MOL    15     265.320 226.180 132.080  1.00  0.00            
ATOM   1764  HC  MOL    15     265.740 225.440 133.580  1.00  0.00            
ATOM   1765  HC  MOL    15     264.780 226.840 133.540  1.00  0.00            
ATOM   1766  HC  MOL    15     260.120 227.690 134.180  1.00  0.00            
ATOM   1767  CT  MOL    15     260.690 227.230 136.170  1.00  0.00            
ATOM   1768  CT  MOL    15     260.340 228.680 136.620  1.00  0.00            
ATOM   1769  HC  MOL    15     261.590 226.930 136.680  1.00  0.00            
ATOM   1770  HC  MOL    15     259.930 226.650 136.630  1.00  0.00            
ATOM   1771  HC  MOL    15     259.420 228.960 136.130  1.00  0.00            
ATOM   1772  HC  MOL    15     260.140 228.710 137.690  1.00  0.00            
ATOM   1773  C_2 MOL    15     261.380 229.750 136.350  1.00  0.00            
ATOM   1774  OS  MOL    15     260.980 230.940 136.800  1.00  0.00            
ATOM   1775  O_2 MOL    15     262.410 229.560 135.760  1.00  0.00            
ATOM   1776  CT  MOL    15     261.800 232.110 136.580  1.00  0.00            
ATOM   1777  CM  MOL    15     260.960 233.270 137.060  1.00  0.00            
ATOM   1778  CM  MOL    15     260.430 234.290 136.360  1.00  0.00            
ATOM   1779  CT  MOL    15     259.580 235.320 137.080  1.00  0.00            
ATOM   1780  HC  MOL    15     262.150 232.150 135.550  1.00  0.00            
ATOM   1781  HC  MOL    15     262.650 232.010 137.210  1.00  0.00            
ATOM   1782  HC  MOL    15     260.730 233.190 138.120  1.00  0.00            
ATOM   1783  HC  MOL    15     258.640 235.370 136.580  1.00  0.00            
ATOM   1784  HC  MOL    15     259.310 235.030 138.090  1.00  0.00            
ATOM   1785  CT  MOL    15     260.590 234.520 134.860  1.00  0.00            
ATOM   1786  HC  MOL    15     261.180 233.760 134.360  1.00  0.00            
ATOM   1787  HC  MOL    15     261.080 235.460 134.630  1.00  0.00            
ATOM   1788  HC  MOL    15     259.640 234.550 134.380  1.00  0.00            
ATOM   1789  CT  MOL    15     260.170 236.740 137.140  1.00  0.00            
ATOM   1790  CM  MOL    15     259.140 237.720 137.640  1.00  0.00            
ATOM   1791  CM  MOL    15     259.190 238.600 138.650  1.00  0.00            
ATOM   1792  CT  MOL    15     257.990 239.530 138.940  1.00  0.00            
ATOM   1793  HC  MOL    15     261.040 236.740 137.780  1.00  0.00            
ATOM   1794  HC  MOL    15     260.510 237.090 136.190  1.00  0.00            
ATOM   1795  HC  MOL    15     258.200 237.700 137.090  1.00  0.00            
ATOM   1796  HC  MOL    15     258.340 240.550 138.780  1.00  0.00            
ATOM   1797  HC  MOL    15     257.780 239.410 140.010  1.00  0.00            
ATOM   1798  CT  MOL    15     260.410 238.780 139.540  1.00  0.00            
ATOM   1799  HC  MOL    15     261.260 238.150 139.320  1.00  0.00            
ATOM   1800  HC  MOL    15     260.140 238.640 140.570  1.00  0.00            
ATOM   1801  HC  MOL    15     260.770 239.810 139.450  1.00  0.00            
ATOM   1802  CT  MOL    15     256.670 239.340 138.170  1.00  0.00            
ATOM   1803  CM  MOL    15     255.580 240.270 138.600  1.00  0.00            
ATOM   1804  CM  MOL    15     254.360 240.070 139.100  1.00  0.00            
ATOM   1805  CT  MOL    15     253.400 241.210 139.310  1.00  0.00            
ATOM   1806  HC  MOL    15     256.820 239.580 137.100  1.00  0.00            
ATOM   1807  HC  MOL    15     256.360 238.310 138.280  1.00  0.00            
ATOM   1808  HC  MOL    15     255.820 241.300 138.440  1.00  0.00            
ATOM   1809  HC  MOL    15     252.390 241.020 138.870  1.00  0.00            
ATOM   1810  HC  MOL    15     253.780 242.110 138.880  1.00  0.00            
ATOM   1811  HC  MOL    15     253.230 241.410 140.370  1.00  0.00            
ATOM   1812  CT  MOL    15     253.750 238.730 139.440  1.00  0.00            
ATOM   1813  HC  MOL    15     254.420 237.890 139.330  1.00  0.00            
ATOM   1814  HC  MOL    15     252.860 238.570 138.870  1.00  0.00            
ATOM   1815  HC  MOL    15     253.410 238.790 140.460  1.00  0.00            
ATOM   1816  CS  MOL    16     256.710 224.050 130.340  1.00  0.00            
ATOM   1817  CW  MOL    16     255.350 224.600 130.940  1.00  0.00            
ATOM   1818  NA  MOL    16     255.670 225.890 131.580  1.00  0.00            
ATOM   1819  CW  MOL    16     257.090 226.230 131.390  1.00  0.00            
ATOM   1820  CS  MOL    16     257.740 225.010 130.630  1.00  0.00            
ATOM   1821  CM  MOL    16     257.760 227.360 131.750  1.00  0.00            
ATOM   1822  CW  MOL    16     257.240 228.510 132.390  1.00  0.00            
ATOM   1823  CS  MOL    16     258.060 229.770 132.740  1.00  0.00            
ATOM   1824  CS  MOL    16     257.180 230.680 133.470  1.00  0.00            
ATOM   1825  CW  MOL    16     255.790 230.040 133.500  1.00  0.00            
ATOM   1826  NA  MOL    16     255.890 228.690 132.840  1.00  0.00            
ATOM   1827  CM  MOL    16     254.700 230.540 134.100  1.00  0.00            
ATOM   1828  CW  MOL    16     253.440 229.930 134.160  1.00  0.00            
ATOM   1829  CS  MOL    16     252.170 230.410 134.810  1.00  0.00            
ATOM   1830  CS  MOL    16     251.140 229.320 134.570  1.00  0.00            
ATOM   1831  CW  MOL    16     251.850 228.220 133.740  1.00  0.00            
ATOM   1832  NA  MOL    16     253.210 228.590 133.520  1.00  0.00            
ATOM   1833  CM  MOL    16     250.940 227.050 133.450  1.00  0.00            
ATOM   1834  CT  MOL    16     249.530 227.440 134.150  1.00  0.00            
ATOM   1835  C_2 MOL    16     249.690 228.900 134.880  1.00  0.00            
ATOM   1836  CW  MOL    16     251.360 226.000 132.770  1.00  0.00            
ATOM   1837  NA  MOL    16     252.760 225.770 132.270  1.00  0.00            
ATOM   1838  CW  MOL    16     252.930 224.540 131.610  1.00  0.00            
ATOM   1839  CT  MOL    16     251.540 223.690 131.710  1.00  0.00            
ATOM   1840  CT  MOL    16     250.490 224.710 132.420  1.00  0.00            
ATOM   1841  CM  MOL    16     254.100 223.960 130.980  1.00  0.00            
ATOM   1842  MG  MOL    16     254.370 227.290 132.350  1.00  0.00            
ATOM   1843  CT  MOL    16     256.910 222.750 129.540  1.00  0.00            
ATOM   1844  HC  MOL    16     256.570 221.860 130.050  1.00  0.00            
ATOM   1845  HC  MOL    16     256.380 222.820 128.590  1.00  0.00            
ATOM   1846  HC  MOL    16     257.930 222.570 129.310  1.00  0.00            
ATOM   1847  CT  MOL    16     259.250 224.900 130.280  1.00  0.00            
ATOM   1848  OH  MOL    16     259.750 223.660 130.680  1.00  0.00            
ATOM   1849  HO  MOL    16     259.100 223.000 130.490  1.00  0.00            
ATOM   1850  CT  MOL    16     259.520 225.160 128.780  1.00  0.00            
ATOM   1851  HC  MOL    16     258.950 224.530 128.130  1.00  0.00            
ATOM   1852  HC  MOL    16     260.590 224.980 128.570  1.00  0.00            
ATOM   1853  HC  MOL    16     259.280 226.190 128.520  1.00  0.00            
ATOM   1854  HC  MOL    16     259.800 225.640 130.830  1.00  0.00            
ATOM   1855  HC  MOL    16     258.800 227.420 131.500  1.00  0.00            
ATOM   1856  CT  MOL    16     257.540 231.970 134.120  1.00  0.00            
ATOM   1857  CT  MOL    16     257.580 231.890 135.660  1.00  0.00            
ATOM   1858  HC  MOL    16     258.350 231.220 136.040  1.00  0.00            
ATOM   1859  HC  MOL    16     256.580 231.630 136.040  1.00  0.00            
ATOM   1860  HC  MOL    16     257.820 232.890 136.040  1.00  0.00            
ATOM   1861  HC  MOL    16     258.530 232.280 133.790  1.00  0.00            
ATOM   1862  HC  MOL    16     256.840 232.710 133.820  1.00  0.00            
ATOM   1863  HC  MOL    16     254.800 231.490 134.610  1.00  0.00            
ATOM   1864  CT  MOL    16     251.930 231.730 135.530  1.00  0.00            
ATOM   1865  CT  MOL    16     251.850 231.560 137.040  1.00  0.00            
ATOM   1866  HC  MOL    16     252.740 231.120 137.440  1.00  0.00            
ATOM   1867  HC  MOL    16     251.030 230.960 137.360  1.00  0.00            
ATOM   1868  HC  MOL    16     251.730 232.530 137.480  1.00  0.00            
ATOM   1869  HC  MOL    16     251.020 232.170 135.170  1.00  0.00            
ATOM   1870  HC  MOL    16     252.750 232.430 135.320  1.00  0.00            
ATOM   1871  O_2 MOL    16     248.820 229.430 135.520  1.00  0.00            
ATOM   1872  HC  MOL    16     248.750 227.550 133.400  1.00  0.00            
ATOM   1873  HC  MOL    16     249.260 226.710 134.900  1.00  0.00            
ATOM   1874  CT  MOL    16     251.720 222.450 132.630  1.00  0.00            
ATOM   1875  HC  MOL    16     252.450 221.740 132.270  1.00  0.00            
ATOM   1876  HC  MOL    16     251.990 222.700 133.640  1.00  0.00            
ATOM   1877  HC  MOL    16     250.780 221.890 132.680  1.00  0.00            
ATOM   1878  HC  MOL    16     251.150 223.380 130.730  1.00  0.00            
ATOM   1879  CT  MOL    16     259.510 229.990 132.420  1.00  0.00            
ATOM   1880  HC  MOL    16     260.080 230.000 133.310  1.00  0.00            
ATOM   1881  HC  MOL    16     259.990 229.300 131.730  1.00  0.00            
ATOM   1882  HC  MOL    16     259.590 230.950 131.950  1.00  0.00            
ATOM   1883  CT  MOL    16     253.880 222.620 130.300  1.00  0.00            
ATOM   1884  HC  MOL    16     254.360 222.630 129.340  1.00  0.00            
ATOM   1885  HC  MOL    16     252.870 222.330 130.080  1.00  0.00            
ATOM   1886  HC  MOL    16     254.380 221.850 130.850  1.00  0.00            
ATOM   1887  HC  MOL    16     250.170 224.270 133.350  1.00  0.00            
ATOM   1888  CT  MOL    16     249.220 225.000 131.570  1.00  0.00            
ATOM   1889  CT  MOL    16     248.270 223.780 131.320  1.00  0.00            
ATOM   1890  HC  MOL    16     249.560 225.420 130.600  1.00  0.00            
ATOM   1891  HC  MOL    16     248.660 225.750 132.060  1.00  0.00            
ATOM   1892  HC  MOL    16     247.450 224.130 130.740  1.00  0.00            
ATOM   1893  HC  MOL    16     248.810 223.070 130.730  1.00  0.00            
ATOM   1894  C_2 MOL    16     247.700 223.150 132.580  1.00  0.00            
ATOM   1895  OS  MOL    16     248.050 221.860 132.650  1.00  0.00            
ATOM   1896  O_2 MOL    16     247.350 223.750 133.550  1.00  0.00            
ATOM   1897  CT  MOL    16     247.980 221.150 133.900  1.00  0.00            
ATOM   1898  CM  MOL    16     248.140 219.710 133.560  1.00  0.00            
ATOM   1899  CM  MOL    16     247.440 218.620 133.950  1.00  0.00            
ATOM   1900  CT  MOL    16     247.790 217.240 133.420  1.00  0.00            
ATOM   1901  HC  MOL    16     247.040 221.390 134.380  1.00  0.00            
ATOM   1902  HC  MOL    16     248.760 221.540 134.550  1.00  0.00            
ATOM   1903  HC  MOL    16     248.960 219.570 132.900  1.00  0.00            
ATOM   1904  HC  MOL    16     246.900 216.670 133.160  1.00  0.00            
ATOM   1905  HC  MOL    16     248.380 217.310 132.500  1.00  0.00            
ATOM   1906  CT  MOL    16     246.210 218.640 134.860  1.00  0.00            
ATOM   1907  HC  MOL    16     245.960 219.610 135.250  1.00  0.00            
ATOM   1908  HC  MOL    16     246.350 218.010 135.700  1.00  0.00            
ATOM   1909  HC  MOL    16     245.340 218.200 134.380  1.00  0.00            
ATOM   1910  CT  MOL    16     248.560 216.320 134.400  1.00  0.00            
ATOM   1911  CM  MOL    16     250.000 216.770 134.650  1.00  0.00            
ATOM   1912  CM  MOL    16     251.140 216.100 134.520  1.00  0.00            
ATOM   1913  CT  MOL    16     252.450 216.830 134.880  1.00  0.00            
ATOM   1914  HC  MOL    16     248.030 216.330 135.350  1.00  0.00            
ATOM   1915  HC  MOL    16     248.510 215.300 133.990  1.00  0.00            
ATOM   1916  HC  MOL    16     250.060 217.800 134.960  1.00  0.00            
ATOM   1917  HC  MOL    16     252.900 216.340 135.730  1.00  0.00            
ATOM   1918  HC  MOL    16     252.230 217.840 135.170  1.00  0.00            
ATOM   1919  CT  MOL    16     251.270 214.630 134.160  1.00  0.00            
ATOM   1920  HC  MOL    16     250.320 214.120 134.030  1.00  0.00            
ATOM   1921  HC  MOL    16     251.890 214.130 134.880  1.00  0.00            
ATOM   1922  HC  MOL    16     251.800 214.510 133.210  1.00  0.00            
ATOM   1923  CT  MOL    16     253.480 216.880 133.730  1.00  0.00            
ATOM   1924  CM  MOL    16     254.740 217.620 134.140  1.00  0.00            
ATOM   1925  CM  MOL    16     255.930 217.180 134.480  1.00  0.00            
ATOM   1926  CT  MOL    16     257.040 218.170 134.830  1.00  0.00            
ATOM   1927  HC  MOL    16     253.670 215.840 133.440  1.00  0.00            
ATOM   1928  HC  MOL    16     253.040 217.330 132.830  1.00  0.00            
ATOM   1929  HC  MOL    16     254.620 218.680 134.150  1.00  0.00            
ATOM   1930  HC  MOL    16     257.520 217.890 135.770  1.00  0.00            
ATOM   1931  HC  MOL    16     256.740 219.200 134.920  1.00  0.00            
ATOM   1932  HC  MOL    16     257.830 218.140 134.110  1.00  0.00            
ATOM   1933  CT  MOL    16     256.410 215.740 134.600  1.00  0.00            
ATOM   1934  HC  MOL    16     257.170 215.450 133.910  1.00  0.00            
ATOM   1935  HC  MOL    16     255.570 215.070 134.400  1.00  0.00            
ATOM   1936  HC  MOL    16     256.770 215.550 135.600  1.00  0.00            
ATOM   1937  CS  MOL    17     278.820 216.970 133.500  1.00  0.00            
ATOM   1938  CW  MOL    17     277.440 217.630 133.940  1.00  0.00            
ATOM   1939  NA  MOL    17     276.450 216.540 133.980  1.00  0.00            
ATOM   1940  CW  MOL    17     277.070 215.270 133.530  1.00  0.00            
ATOM   1941  CS  MOL    17     278.590 215.550 133.340  1.00  0.00            
ATOM   1942  CM  MOL    17     276.450 214.120 133.210  1.00  0.00            
ATOM   1943  CW  MOL    17     275.050 213.810 133.340  1.00  0.00            
ATOM   1944  CS  MOL    17     274.410 212.480 132.890  1.00  0.00            
ATOM   1945  CS  MOL    17     273.010 212.520 133.290  1.00  0.00            
ATOM   1946  CW  MOL    17     272.760 213.850 134.020  1.00  0.00            
ATOM   1947  NA  MOL    17     274.060 214.640 133.940  1.00  0.00            
ATOM   1948  CM  MOL    17     271.620 214.220 134.670  1.00  0.00            
ATOM   1949  CW  MOL    17     271.420 215.490 135.260  1.00  0.00            
ATOM   1950  CS  MOL    17     270.230 216.090 135.920  1.00  0.00            
ATOM   1951  CS  MOL    17     270.570 217.540 136.250  1.00  0.00            
ATOM   1952  CW  MOL    17     272.020 217.730 135.760  1.00  0.00            
ATOM   1953  NA  MOL    17     272.510 216.520 135.160  1.00  0.00            
ATOM   1954  CM  MOL    17     272.510 219.140 135.990  1.00  0.00            
ATOM   1955  CT  MOL    17     271.250 219.930 136.650  1.00  0.00            
ATOM   1956  C_2 MOL    17     270.010 218.860 136.810  1.00  0.00            
ATOM   1957  CW  MOL    17     273.700 219.610 135.590  1.00  0.00            
ATOM   1958  NA  MOL    17     274.770 218.770 134.940  1.00  0.00            
ATOM   1959  CW  MOL    17     275.930 219.510 134.620  1.00  0.00            
ATOM   1960  CT  MOL    17     275.680 221.080 134.970  1.00  0.00            
ATOM   1961  CT  MOL    17     274.210 221.100 135.700  1.00  0.00            
ATOM   1962  CM  MOL    17     277.200 219.000 134.190  1.00  0.00            
ATOM   1963  MG  MOL    17     274.430 216.680 134.360  1.00  0.00            
ATOM   1964  CT  MOL    17     280.160 217.590 133.170  1.00  0.00            
ATOM   1965  HC  MOL    17     280.050 218.530 132.640  1.00  0.00            
ATOM   1966  HC  MOL    17     280.720 217.790 134.080  1.00  0.00            
ATOM   1967  HC  MOL    17     280.780 216.970 132.550  1.00  0.00            
ATOM   1968  CT  MOL    17     279.600 214.470 132.950  1.00  0.00            
ATOM   1969  OH  MOL    17     280.810 214.530 133.700  1.00  0.00            
ATOM   1970  HO  MOL    17     281.260 215.270 133.310  1.00  0.00            
ATOM   1971  CT  MOL    17     279.860 214.470 131.450  1.00  0.00            
ATOM   1972  HC  MOL    17     280.390 215.360 131.130  1.00  0.00            
ATOM   1973  HC  MOL    17     278.940 214.400 130.880  1.00  0.00            
ATOM   1974  HC  MOL    17     280.480 213.620 131.190  1.00  0.00            
ATOM   1975  HC  MOL    17     279.220 213.490 133.190  1.00  0.00            
ATOM   1976  HC  MOL    17     277.050 213.350 132.810  1.00  0.00            
ATOM   1977  CT  MOL    17     271.990 211.400 133.140  1.00  0.00            
ATOM   1978  CT  MOL    17     272.040 210.310 134.260  1.00  0.00            
ATOM   1979  HC  MOL    17     272.990 209.770 134.230  1.00  0.00            
ATOM   1980  HC  MOL    17     271.260 209.610 134.130  1.00  0.00            
ATOM   1981  HC  MOL    17     271.970 210.740 135.270  1.00  0.00            
ATOM   1982  HC  MOL    17     272.090 210.940 132.160  1.00  0.00            
ATOM   1983  HC  MOL    17     271.000 211.860 133.130  1.00  0.00            
ATOM   1984  HC  MOL    17     270.810 213.530 134.720  1.00  0.00            
ATOM   1985  CT  MOL    17     268.920 215.370 136.210  1.00  0.00            
ATOM   1986  CT  MOL    17     267.840 216.230 136.850  1.00  0.00            
ATOM   1987  HC  MOL    17     268.230 216.710 137.740  1.00  0.00            
ATOM   1988  HC  MOL    17     266.990 215.660 137.150  1.00  0.00            
ATOM   1989  HC  MOL    17     267.530 217.000 136.170  1.00  0.00            
ATOM   1990  HC  MOL    17     269.150 214.530 136.860  1.00  0.00            
ATOM   1991  HC  MOL    17     268.550 214.940 135.290  1.00  0.00            
ATOM   1992  O_2 MOL    17     268.950 219.160 137.290  1.00  0.00            
ATOM   1993  HC  MOL    17     271.450 220.330 137.660  1.00  0.00            
ATOM   1994  HC  MOL    17     270.880 220.750 136.070  1.00  0.00            
ATOM   1995  CT  MOL    17     275.620 221.910 133.650  1.00  0.00            
ATOM   1996  HC  MOL    17     276.570 221.920 133.080  1.00  0.00            
ATOM   1997  HC  MOL    17     274.880 221.510 133.000  1.00  0.00            
ATOM   1998  HC  MOL    17     275.370 222.920 133.890  1.00  0.00            
ATOM   1999  HC  MOL    17     276.410 221.470 135.630  1.00  0.00            
ATOM   2000  CT  MOL    17     275.110 211.390 132.110  1.00  0.00            
ATOM   2001  HC  MOL    17     275.090 211.570 131.040  1.00  0.00            
ATOM   2002  HC  MOL    17     276.150 211.300 132.380  1.00  0.00            
ATOM   2003  HC  MOL    17     274.690 210.410 132.230  1.00  0.00            
ATOM   2004  CT  MOL    17     278.340 220.030 134.080  1.00  0.00            
ATOM   2005  HC  MOL    17     278.460 220.330 133.050  1.00  0.00            
ATOM   2006  HC  MOL    17     279.300 219.660 134.450  1.00  0.00            
ATOM   2007  HC  MOL    17     278.170 220.930 134.640  1.00  0.00            
ATOM   2008  HC  MOL    17     273.520 221.750 135.130  1.00  0.00            
ATOM   2009  CT  MOL    17     274.230 221.560 137.200  1.00  0.00            
ATOM   2010  CT  MOL    17     273.560 222.920 137.440  1.00  0.00            
ATOM   2011  HC  MOL    17     275.250 221.570 137.590  1.00  0.00            
ATOM   2012  HC  MOL    17     273.710 220.860 137.820  1.00  0.00            
ATOM   2013  HC  MOL    17     272.510 222.890 137.130  1.00  0.00            
ATOM   2014  HC  MOL    17     273.600 223.030 138.510  1.00  0.00            
ATOM   2015  C_2 MOL    17     274.300 224.160 136.940  1.00  0.00            
ATOM   2016  OS  MOL    17     273.610 225.270 137.170  1.00  0.00            
ATOM   2017  O_2 MOL    17     275.320 224.110 136.330  1.00  0.00            
ATOM   2018  CT  MOL    17     274.150 226.580 136.880  1.00  0.00            
ATOM   2019  CM  MOL    17     273.060 227.550 137.270  1.00  0.00            
ATOM   2020  CM  MOL    17     272.340 228.370 136.520  1.00  0.00            
ATOM   2021  CT  MOL    17     271.180 229.140 137.140  1.00  0.00            
ATOM   2022  HC  MOL    17     274.420 226.520 135.850  1.00  0.00            
ATOM   2023  HC  MOL    17     275.050 226.770 137.430  1.00  0.00            
ATOM   2024  HC  MOL    17     272.760 227.470 138.320  1.00  0.00            
ATOM   2025  HC  MOL    17     270.250 228.760 136.670  1.00  0.00            
ATOM   2026  HC  MOL    17     271.080 228.900 138.180  1.00  0.00            
ATOM   2027  CT  MOL    17     272.490 228.540 135.010  1.00  0.00            
ATOM   2028  HC  MOL    17     273.180 227.800 134.580  1.00  0.00            
ATOM   2029  HC  MOL    17     272.890 229.510 134.790  1.00  0.00            
ATOM   2030  HC  MOL    17     271.540 228.430 134.490  1.00  0.00            
ATOM   2031  CT  MOL    17     271.170 230.700 137.020  1.00  0.00            
ATOM   2032  CM  MOL    17     269.860 231.250 137.530  1.00  0.00            
ATOM   2033  CM  MOL    17     268.750 231.700 136.930  1.00  0.00            
ATOM   2034  CT  MOL    17     267.530 232.080 137.740  1.00  0.00            
ATOM   2035  HC  MOL    17     272.010 231.140 137.560  1.00  0.00            
ATOM   2036  HC  MOL    17     271.300 231.020 135.990  1.00  0.00            
ATOM   2037  HC  MOL    17     269.890 231.200 138.630  1.00  0.00            
ATOM   2038  HC  MOL    17     267.650 231.730 138.760  1.00  0.00            
ATOM   2039  HC  MOL    17     266.640 231.580 137.360  1.00  0.00            
ATOM   2040  CT  MOL    17     268.580 231.760 135.450  1.00  0.00            
ATOM   2041  HC  MOL    17     269.440 231.530 134.850  1.00  0.00            
ATOM   2042  HC  MOL    17     268.300 232.770 135.180  1.00  0.00            
ATOM   2043  HC  MOL    17     267.770 231.100 135.170  1.00  0.00            
ATOM   2044  CT  MOL    17     267.260 233.600 137.800  1.00  0.00            
ATOM   2045  CM  MOL    17     266.010 233.930 138.600  1.00  0.00            
ATOM   2046  CM  MOL    17     264.870 234.510 138.250  1.00  0.00            
ATOM   2047  CT  MOL    17     263.770 234.760 139.280  1.00  0.00            
ATOM   2048  HC  MOL    17     268.120 234.110 138.200  1.00  0.00            
ATOM   2049  HC  MOL    17     267.190 233.980 136.800  1.00  0.00            
ATOM   2050  HC  MOL    17     266.110 233.640 139.640  1.00  0.00            
ATOM   2051  HC  MOL    17     263.660 235.840 139.450  1.00  0.00            
ATOM   2052  HC  MOL    17     263.990 234.310 140.230  1.00  0.00            
ATOM   2053  HC  MOL    17     262.790 234.370 138.950  1.00  0.00            
ATOM   2054  CT  MOL    17     264.570 235.030 136.860  1.00  0.00            
ATOM   2055  HC  MOL    17     265.280 234.780 136.090  1.00  0.00            
ATOM   2056  HC  MOL    17     264.430 236.140 136.910  1.00  0.00            
ATOM   2057  HC  MOL    17     263.630 234.670 136.500  1.00  0.00            
ATOM   2058  CS  MOL    18     270.190 216.970 132.220  1.00  0.00            
ATOM   2059  CW  MOL    18     268.780 217.480 132.770  1.00  0.00            
ATOM   2060  NA  MOL    18     268.950 218.880 133.150  1.00  0.00            
ATOM   2061  CW  MOL    18     270.360 219.300 132.870  1.00  0.00            
ATOM   2062  CS  MOL    18     271.140 218.070 132.320  1.00  0.00            
ATOM   2063  CM  MOL    18     270.900 220.530 133.050  1.00  0.00            
ATOM   2064  CW  MOL    18     270.260 221.720 133.580  1.00  0.00            
ATOM   2065  CS  MOL    18     270.980 223.080 133.760  1.00  0.00            
ATOM   2066  CS  MOL    18     270.030 223.970 134.430  1.00  0.00            
ATOM   2067  CW  MOL    18     268.700 223.200 134.600  1.00  0.00            
ATOM   2068  NA  MOL    18     268.910 221.810 134.030  1.00  0.00            
ATOM   2069  CM  MOL    18     267.550 223.690 135.140  1.00  0.00            
ATOM   2070  CW  MOL    18     266.350 222.950 135.240  1.00  0.00            
ATOM   2071  CS  MOL    18     265.010 223.410 135.770  1.00  0.00            
ATOM   2072  CS  MOL    18     264.070 222.250 135.590  1.00  0.00            
ATOM   2073  CW  MOL    18     264.870 221.130 134.940  1.00  0.00            
ATOM   2074  NA  MOL    18     266.240 221.520 134.730  1.00  0.00            
ATOM   2075  CM  MOL    18     264.070 219.880 134.740  1.00  0.00            
ATOM   2076  CT  MOL    18     262.560 220.260 135.270  1.00  0.00            
ATOM   2077  C_2 MOL    18     262.600 221.800 135.810  1.00  0.00            
ATOM   2078  CW  MOL    18     264.620 218.750 134.230  1.00  0.00            
ATOM   2079  NA  MOL    18     266.070 218.570 133.840  1.00  0.00            
ATOM   2080  CW  MOL    18     266.360 217.240 133.430  1.00  0.00            
ATOM   2081  CT  MOL    18     265.040 216.330 133.600  1.00  0.00            
ATOM   2082  CT  MOL    18     263.870 217.360 134.060  1.00  0.00            
ATOM   2083  CM  MOL    18     267.590 216.720 132.910  1.00  0.00            
ATOM   2084  MG  MOL    18     267.510 220.240 133.720  1.00  0.00            
ATOM   2085  CT  MOL    18     270.540 215.650 131.570  1.00  0.00            
ATOM   2086  HC  MOL    18     270.470 214.780 132.220  1.00  0.00            
ATOM   2087  HC  MOL    18     269.930 215.450 130.710  1.00  0.00            
ATOM   2088  HC  MOL    18     271.550 215.610 131.180  1.00  0.00            
ATOM   2089  CT  MOL    18     272.650 218.130 131.970  1.00  0.00            
ATOM   2090  OH  MOL    18     273.360 217.020 132.430  1.00  0.00            
ATOM   2091  HO  MOL    18     272.780 216.260 132.450  1.00  0.00            
ATOM   2092  CT  MOL    18     272.850 218.340 130.470  1.00  0.00            
ATOM   2093  HC  MOL    18     272.420 217.520 129.940  1.00  0.00            
ATOM   2094  HC  MOL    18     273.920 218.400 130.290  1.00  0.00            
ATOM   2095  HC  MOL    18     272.420 219.300 130.140  1.00  0.00            
ATOM   2096  HC  MOL    18     273.040 218.990 132.500  1.00  0.00            
ATOM   2097  HC  MOL    18     271.920 220.700 132.800  1.00  0.00            
ATOM   2098  CT  MOL    18     270.310 225.360 134.970  1.00  0.00            
ATOM   2099  CT  MOL    18     270.300 225.420 136.500  1.00  0.00            
ATOM   2100  HC  MOL    18     271.070 224.780 136.920  1.00  0.00            
ATOM   2101  HC  MOL    18     269.360 225.100 136.930  1.00  0.00            
ATOM   2102  HC  MOL    18     270.420 226.450 136.830  1.00  0.00            
ATOM   2103  HC  MOL    18     271.270 225.710 134.570  1.00  0.00            
ATOM   2104  HC  MOL    18     269.540 226.020 134.610  1.00  0.00            
ATOM   2105  HC  MOL    18     267.550 224.720 135.490  1.00  0.00            
ATOM   2106  CT  MOL    18     264.620 224.740 136.390  1.00  0.00            
ATOM   2107  CT  MOL    18     264.340 224.680 137.900  1.00  0.00            
ATOM   2108  HC  MOL    18     265.170 224.290 138.440  1.00  0.00            
ATOM   2109  HC  MOL    18     263.470 224.080 138.060  1.00  0.00            
ATOM   2110  HC  MOL    18     264.110 225.680 138.260  1.00  0.00            
ATOM   2111  HC  MOL    18     263.740 225.090 135.820  1.00  0.00            
ATOM   2112  HC  MOL    18     265.410 225.480 136.240  1.00  0.00            
ATOM   2113  O_2 MOL    18     261.660 222.430 136.220  1.00  0.00            
ATOM   2114  HC  MOL    18     261.760 220.230 134.560  1.00  0.00            
ATOM   2115  HC  MOL    18     262.230 219.650 136.120  1.00  0.00            
ATOM   2116  CT  MOL    18     265.240 215.230 134.710  1.00  0.00            
ATOM   2117  HC  MOL    18     266.130 214.660 134.590  1.00  0.00            
ATOM   2118  HC  MOL    18     265.270 215.700 135.700  1.00  0.00            
ATOM   2119  HC  MOL    18     264.410 214.560 134.730  1.00  0.00            
ATOM   2120  HC  MOL    18     264.780 215.840 132.680  1.00  0.00            
ATOM   2121  CT  MOL    18     272.350 223.400 133.300  1.00  0.00            
ATOM   2122  HC  MOL    18     272.850 224.010 134.000  1.00  0.00            
ATOM   2123  HC  MOL    18     272.980 222.530 133.110  1.00  0.00            
ATOM   2124  HC  MOL    18     272.310 223.950 132.370  1.00  0.00            
ATOM   2125  CT  MOL    18     267.620 215.230 132.430  1.00  0.00            
ATOM   2126  HC  MOL    18     267.970 215.120 131.440  1.00  0.00            
ATOM   2127  HC  MOL    18     266.640 214.730 132.450  1.00  0.00            
ATOM   2128  HC  MOL    18     268.320 214.680 133.030  1.00  0.00            
ATOM   2129  HC  MOL    18     263.510 217.040 135.020  1.00  0.00            
ATOM   2130  CT  MOL    18     262.650 217.470 133.120  1.00  0.00            
ATOM   2131  CT  MOL    18     261.730 216.220 133.010  1.00  0.00            
ATOM   2132  HC  MOL    18     263.000 217.750 132.130  1.00  0.00            
ATOM   2133  HC  MOL    18     262.010 218.280 133.410  1.00  0.00            
ATOM   2134  HC  MOL    18     261.040 216.390 132.200  1.00  0.00            
ATOM   2135  HC  MOL    18     262.320 215.390 132.680  1.00  0.00            
ATOM   2136  C_2 MOL    18     260.930 215.810 134.260  1.00  0.00            
ATOM   2137  OS  MOL    18     261.580 214.910 135.020  1.00  0.00            
ATOM   2138  O_2 MOL    18     259.800 216.070 134.450  1.00  0.00            
ATOM   2139  CT  MOL    18     260.950 214.350 136.190  1.00  0.00            
ATOM   2140  CM  MOL    18     261.950 213.420 136.780  1.00  0.00            
ATOM   2141  CM  MOL    18     261.990 212.080 136.790  1.00  0.00            
ATOM   2142  CT  MOL    18     263.150 211.380 137.510  1.00  0.00            
ATOM   2143  HC  MOL    18     260.000 213.880 135.940  1.00  0.00            
ATOM   2144  HC  MOL    18     260.760 215.160 136.880  1.00  0.00            
ATOM   2145  HC  MOL    18     262.760 213.950 137.280  1.00  0.00            
ATOM   2146  HC  MOL    18     263.560 210.580 136.880  1.00  0.00            
ATOM   2147  HC  MOL    18     264.020 212.030 137.700  1.00  0.00            
ATOM   2148  CT  MOL    18     261.040 211.140 136.070  1.00  0.00            
ATOM   2149  HC  MOL    18     260.200 211.610 135.560  1.00  0.00            
ATOM   2150  HC  MOL    18     260.680 210.390 136.760  1.00  0.00            
ATOM   2151  HC  MOL    18     261.640 210.600 135.330  1.00  0.00            
ATOM   2152  CT  MOL    18     262.750 210.750 138.870  1.00  0.00            
ATOM   2153  CM  MOL    18     263.830 209.890 139.510  1.00  0.00            
ATOM   2154  CM  MOL    18     263.950 208.580 139.520  1.00  0.00            
ATOM   2155  CT  MOL    18     265.120 207.950 140.280  1.00  0.00            
ATOM   2156  HC  MOL    18     262.470 211.560 139.540  1.00  0.00            
ATOM   2157  HC  MOL    18     261.840 210.200 138.800  1.00  0.00            
ATOM   2158  HC  MOL    18     264.600 210.490 140.040  1.00  0.00            
ATOM   2159  HC  MOL    18     264.740 207.090 140.860  1.00  0.00            
ATOM   2160  HC  MOL    18     265.530 208.660 141.020  1.00  0.00            
ATOM   2161  CT  MOL    18     262.940 207.600 138.940  1.00  0.00            
ATOM   2162  HC  MOL    18     262.120 208.040 138.380  1.00  0.00            
ATOM   2163  HC  MOL    18     262.510 206.960 139.690  1.00  0.00            
ATOM   2164  HC  MOL    18     263.440 206.930 138.240  1.00  0.00            
ATOM   2165  CT  MOL    18     266.300 207.420 139.430  1.00  0.00            
ATOM   2166  CM  MOL    18     267.300 206.680 140.290  1.00  0.00            
ATOM   2167  CM  MOL    18     267.880 205.470 140.160  1.00  0.00            
ATOM   2168  CT  MOL    18     268.850 204.990 141.210  1.00  0.00            
ATOM   2169  HC  MOL    18     265.860 206.700 138.720  1.00  0.00            
ATOM   2170  HC  MOL    18     266.780 208.190 138.860  1.00  0.00            
ATOM   2171  HC  MOL    18     267.580 207.280 141.160  1.00  0.00            
ATOM   2172  HC  MOL    18     268.500 204.050 141.650  1.00  0.00            
ATOM   2173  HC  MOL    18     269.020 205.660 142.030  1.00  0.00            
ATOM   2174  HC  MOL    18     269.820 204.710 140.790  1.00  0.00            
ATOM   2175  CT  MOL    18     267.640 204.510 139.010  1.00  0.00            
ATOM   2176  HC  MOL    18     268.540 204.310 138.460  1.00  0.00            
ATOM   2177  HC  MOL    18     266.920 204.860 138.300  1.00  0.00            
ATOM   2178  HC  MOL    18     267.250 203.590 139.400  1.00  0.00            
ATOM   2179  CS  MOL    19     292.790 211.550 135.900  1.00  0.00            
ATOM   2180  CW  MOL    19     291.370 212.130 136.340  1.00  0.00            
ATOM   2181  NA  MOL    19     290.460 210.990 136.490  1.00  0.00            
ATOM   2182  CW  MOL    19     291.160 209.760 136.090  1.00  0.00            
ATOM   2183  CS  MOL    19     292.660 210.130 135.820  1.00  0.00            
ATOM   2184  CM  MOL    19     290.650 208.520 135.890  1.00  0.00            
ATOM   2185  CW  MOL    19     289.300 208.070 136.080  1.00  0.00            
ATOM   2186  CS  MOL    19     288.790 206.670 135.710  1.00  0.00            
ATOM   2187  CS  MOL    19     287.410 206.590 136.150  1.00  0.00            
ATOM   2188  CW  MOL    19     287.030 207.950 136.770  1.00  0.00            
ATOM   2189  NA  MOL    19     288.230 208.860 136.640  1.00  0.00            
ATOM   2190  CM  MOL    19     285.830 208.290 137.370  1.00  0.00            
ATOM   2191  CW  MOL    19     285.540 209.590 137.830  1.00  0.00            
ATOM   2192  CS  MOL    19     284.300 210.120 138.450  1.00  0.00            
ATOM   2193  CS  MOL    19     284.550 211.600 138.740  1.00  0.00            
ATOM   2194  CW  MOL    19     286.000 211.880 138.260  1.00  0.00            
ATOM   2195  NA  MOL    19     286.590 210.710 137.720  1.00  0.00            
ATOM   2196  CM  MOL    19     286.370 213.320 138.420  1.00  0.00            
ATOM   2197  CT  MOL    19     285.070 214.040 139.110  1.00  0.00            
ATOM   2198  C_2 MOL    19     283.910 212.900 139.290  1.00  0.00            
ATOM   2199  CW  MOL    19     287.530 213.850 138.000  1.00  0.00            
ATOM   2200  NA  MOL    19     288.660 213.070 137.390  1.00  0.00            
ATOM   2201  CW  MOL    19     289.750 213.870 137.030  1.00  0.00            
ATOM   2202  CT  MOL    19     289.380 215.430 137.300  1.00  0.00            
ATOM   2203  CT  MOL    19     287.950 215.390 138.060  1.00  0.00            
ATOM   2204  CM  MOL    19     291.030 213.460 136.550  1.00  0.00            
ATOM   2205  MG  MOL    19     288.450 210.950 136.840  1.00  0.00            
ATOM   2206  CT  MOL    19     294.080 212.300 135.570  1.00  0.00            
ATOM   2207  HC  MOL    19     293.970 213.000 134.760  1.00  0.00            
ATOM   2208  HC  MOL    19     294.410 212.840 136.460  1.00  0.00            
ATOM   2209  HC  MOL    19     294.880 211.610 135.360  1.00  0.00            
ATOM   2210  CT  MOL    19     293.720 209.050 135.560  1.00  0.00            
ATOM   2211  OH  MOL    19     294.900 209.270 136.310  1.00  0.00            
ATOM   2212  HO  MOL    19     295.490 208.540 136.110  1.00  0.00            
ATOM   2213  CT  MOL    19     293.970 208.830 134.070  1.00  0.00            
ATOM   2214  HC  MOL    19     294.290 209.750 133.550  1.00  0.00            
ATOM   2215  HC  MOL    19     293.050 208.470 133.610  1.00  0.00            
ATOM   2216  HC  MOL    19     294.750 208.070 133.900  1.00  0.00            
ATOM   2217  HC  MOL    19     293.310 208.120 135.910  1.00  0.00            
ATOM   2218  HC  MOL    19     291.270 207.760 135.480  1.00  0.00            
ATOM   2219  CT  MOL    19     286.430 205.410 136.060  1.00  0.00            
ATOM   2220  CT  MOL    19     286.300 204.580 137.370  1.00  0.00            
ATOM   2221  HC  MOL    19     287.260 204.210 137.710  1.00  0.00            
ATOM   2222  HC  MOL    19     285.670 203.730 137.200  1.00  0.00            
ATOM   2223  HC  MOL    19     285.870 205.150 138.200  1.00  0.00            
ATOM   2224  HC  MOL    19     286.820 204.780 135.260  1.00  0.00            
ATOM   2225  HC  MOL    19     285.430 205.680 135.740  1.00  0.00            
ATOM   2226  HC  MOL    19     285.040 207.570 137.470  1.00  0.00            
ATOM   2227  CT  MOL    19     283.060 209.320 138.730  1.00  0.00            
ATOM   2228  CT  MOL    19     281.920 210.060 139.450  1.00  0.00            
ATOM   2229  HC  MOL    19     282.280 210.530 140.350  1.00  0.00            
ATOM   2230  HC  MOL    19     281.140 209.390 139.780  1.00  0.00            
ATOM   2231  HC  MOL    19     281.450 210.820 138.840  1.00  0.00            
ATOM   2232  HC  MOL    19     283.320 208.470 139.390  1.00  0.00            
ATOM   2233  HC  MOL    19     282.700 208.960 137.760  1.00  0.00            
ATOM   2234  O_2 MOL    19     282.850 213.140 139.820  1.00  0.00            
ATOM   2235  HC  MOL    19     285.260 214.500 140.070  1.00  0.00            
ATOM   2236  HC  MOL    19     284.660 214.820 138.470  1.00  0.00            
ATOM   2237  CT  MOL    19     289.200 216.180 135.960  1.00  0.00            
ATOM   2238  HC  MOL    19     290.090 216.300 135.360  1.00  0.00            
ATOM   2239  HC  MOL    19     288.430 215.680 135.360  1.00  0.00            
ATOM   2240  HC  MOL    19     288.830 217.190 136.140  1.00  0.00            
ATOM   2241  HC  MOL    19     290.180 215.940 137.860  1.00  0.00            
ATOM   2242  CT  MOL    19     289.540 205.600 135.010  1.00  0.00            
ATOM   2243  HC  MOL    19     290.610 205.720 135.050  1.00  0.00            
ATOM   2244  HC  MOL    19     289.240 204.660 135.450  1.00  0.00            
ATOM   2245  HC  MOL    19     289.260 205.570 133.950  1.00  0.00            
ATOM   2246  CT  MOL    19     292.100 214.530 136.360  1.00  0.00            
ATOM   2247  HC  MOL    19     292.470 214.530 135.350  1.00  0.00            
ATOM   2248  HC  MOL    19     292.910 214.390 137.060  1.00  0.00            
ATOM   2249  HC  MOL    19     291.770 215.520 136.500  1.00  0.00            
ATOM   2250  HC  MOL    19     287.180 215.960 137.550  1.00  0.00            
ATOM   2251  CT  MOL    19     288.040 215.860 139.520  1.00  0.00            
ATOM   2252  CT  MOL    19     287.190 217.080 139.930  1.00  0.00            
ATOM   2253  HC  MOL    19     289.090 216.030 139.760  1.00  0.00            
ATOM   2254  HC  MOL    19     287.720 215.020 140.190  1.00  0.00            
ATOM   2255  HC  MOL    19     286.140 216.940 139.620  1.00  0.00            
ATOM   2256  HC  MOL    19     287.180 217.130 141.020  1.00  0.00            
ATOM   2257  C_2 MOL    19     287.700 218.420 139.490  1.00  0.00            
ATOM   2258  OS  MOL    19     286.910 219.420 139.950  1.00  0.00            
ATOM   2259  O_2 MOL    19     288.620 218.560 138.740  1.00  0.00            
ATOM   2260  CT  MOL    19     287.150 220.800 139.660  1.00  0.00            
ATOM   2261  CM  MOL    19     286.030 221.520 140.360  1.00  0.00            
ATOM   2262  CM  MOL    19     285.410 222.630 139.980  1.00  0.00            
ATOM   2263  CT  MOL    19     284.200 223.110 140.760  1.00  0.00            
ATOM   2264  HC  MOL    19     287.240 220.960 138.610  1.00  0.00            
ATOM   2265  HC  MOL    19     288.120 221.000 140.090  1.00  0.00            
ATOM   2266  HC  MOL    19     285.650 221.000 141.230  1.00  0.00            
ATOM   2267  HC  MOL    19     283.430 223.380 140.050  1.00  0.00            
ATOM   2268  HC  MOL    19     283.750 222.310 141.360  1.00  0.00            
ATOM   2269  CT  MOL    19     285.680 223.440 138.720  1.00  0.00            
ATOM   2270  HC  MOL    19     286.400 223.010 137.990  1.00  0.00            
ATOM   2271  HC  MOL    19     286.050 224.450 138.900  1.00  0.00            
ATOM   2272  HC  MOL    19     284.750 223.610 138.170  1.00  0.00            
ATOM   2273  CT  MOL    19     284.420 224.340 141.670  1.00  0.00            
ATOM   2274  CM  MOL    19     283.230 224.640 142.540  1.00  0.00            
ATOM   2275  CM  MOL    19     282.280 225.570 142.480  1.00  0.00            
ATOM   2276  CT  MOL    19     281.190 225.560 143.520  1.00  0.00            
ATOM   2277  HC  MOL    19     285.270 224.170 142.310  1.00  0.00            
ATOM   2278  HC  MOL    19     284.690 225.200 141.070  1.00  0.00            
ATOM   2279  HC  MOL    19     283.160 223.930 143.340  1.00  0.00            
ATOM   2280  HC  MOL    19     281.240 224.710 144.210  1.00  0.00            
ATOM   2281  HC  MOL    19     280.220 225.500 143.030  1.00  0.00            
ATOM   2282  CT  MOL    19     282.210 226.640 141.420  1.00  0.00            
ATOM   2283  HC  MOL    19     282.890 226.550 140.620  1.00  0.00            
ATOM   2284  HC  MOL    19     282.290 227.620 141.850  1.00  0.00            
ATOM   2285  HC  MOL    19     281.180 226.620 141.000  1.00  0.00            
ATOM   2286  CT  MOL    19     281.140 226.790 144.440  1.00  0.00            
ATOM   2287  CM  MOL    19     279.990 226.730 145.440  1.00  0.00            
ATOM   2288  CM  MOL    19     278.900 227.460 145.530  1.00  0.00            
ATOM   2289  CT  MOL    19     277.890 227.220 146.680  1.00  0.00            
ATOM   2290  HC  MOL    19     282.100 226.830 144.960  1.00  0.00            
ATOM   2291  HC  MOL    19     281.120 227.690 143.830  1.00  0.00            
ATOM   2292  HC  MOL    19     280.080 225.960 146.210  1.00  0.00            
ATOM   2293  HC  MOL    19     277.710 228.170 147.190  1.00  0.00            
ATOM   2294  HC  MOL    19     278.190 226.450 147.370  1.00  0.00            
ATOM   2295  HC  MOL    19     276.900 226.900 146.360  1.00  0.00            
ATOM   2296  CT  MOL    19     278.480 228.580 144.590  1.00  0.00            
ATOM   2297  HC  MOL    19     279.220 228.830 143.830  1.00  0.00            
ATOM   2298  HC  MOL    19     278.260 229.510 145.120  1.00  0.00            
ATOM   2299  HC  MOL    19     277.590 228.240 144.080  1.00  0.00            
ATOM   2300  CS  MOL    20     284.420 211.170 134.580  1.00  0.00            
ATOM   2301  CW  MOL    20     282.940 211.530 135.060  1.00  0.00            
ATOM   2302  NA  MOL    20     282.950 212.960 135.390  1.00  0.00            
ATOM   2303  CW  MOL    20     284.330 213.520 135.220  1.00  0.00            
ATOM   2304  CS  MOL    20     285.250 212.350 134.720  1.00  0.00            
ATOM   2305  CM  MOL    20     284.730 214.820 135.360  1.00  0.00            
ATOM   2306  CW  MOL    20     283.920 215.970 135.690  1.00  0.00            
ATOM   2307  CS  MOL    20     284.440 217.410 135.780  1.00  0.00            
ATOM   2308  CS  MOL    20     283.330 218.260 136.200  1.00  0.00            
ATOM   2309  CW  MOL    20     282.100 217.350 136.360  1.00  0.00            
ATOM   2310  NA  MOL    20     282.510 215.940 135.990  1.00  0.00            
ATOM   2311  CM  MOL    20     280.860 217.750 136.770  1.00  0.00            
ATOM   2312  CW  MOL    20     279.720 216.920 136.860  1.00  0.00            
ATOM   2313  CS  MOL    20     278.320 217.200 137.340  1.00  0.00            
ATOM   2314  CS  MOL    20     277.560 215.890 137.230  1.00  0.00            
ATOM   2315  CW  MOL    20     278.560 214.860 136.700  1.00  0.00            
ATOM   2316  NA  MOL    20     279.840 215.460 136.490  1.00  0.00            
ATOM   2317  CM  MOL    20     277.960 213.500 136.590  1.00  0.00            
ATOM   2318  CT  MOL    20     276.400 213.660 137.060  1.00  0.00            
ATOM   2319  C_2 MOL    20     276.200 215.220 137.510  1.00  0.00            
ATOM   2320  CW  MOL    20     278.650 212.430 136.220  1.00  0.00            
ATOM   2321  NA  MOL    20     280.090 212.390 135.910  1.00  0.00            
ATOM   2322  CW  MOL    20     280.550 211.080 135.630  1.00  0.00            
ATOM   2323  CT  MOL    20     279.340 210.020 135.870  1.00  0.00            
ATOM   2324  CT  MOL    20     278.050 210.960 136.140  1.00  0.00            
ATOM   2325  CM  MOL    20     281.840 210.660 135.190  1.00  0.00            
ATOM   2326  MG  MOL    20     281.320 214.190 135.710  1.00  0.00            
ATOM   2327  CT  MOL    20     284.950 209.830 134.030  1.00  0.00            
ATOM   2328  HC  MOL    20     285.170 209.120 134.820  1.00  0.00            
ATOM   2329  HC  MOL    20     284.270 209.400 133.310  1.00  0.00            
ATOM   2330  HC  MOL    20     285.860 209.990 133.450  1.00  0.00            
ATOM   2331  CT  MOL    20     286.750 212.490 134.460  1.00  0.00            
ATOM   2332  OH  MOL    20     287.500 211.410 135.000  1.00  0.00            
ATOM   2333  HO  MOL    20     286.950 210.630 134.930  1.00  0.00            
ATOM   2334  CT  MOL    20     287.030 212.710 132.950  1.00  0.00            
ATOM   2335  HC  MOL    20     286.720 211.840 132.390  1.00  0.00            
ATOM   2336  HC  MOL    20     288.080 212.850 132.840  1.00  0.00            
ATOM   2337  HC  MOL    20     286.560 213.600 132.560  1.00  0.00            
ATOM   2338  HC  MOL    20     287.080 213.400 134.950  1.00  0.00            
ATOM   2339  HC  MOL    20     285.750 215.040 135.180  1.00  0.00            
ATOM   2340  CT  MOL    20     283.380 219.740 136.510  1.00  0.00            
ATOM   2341  CT  MOL    20     283.770 220.010 137.950  1.00  0.00            
ATOM   2342  HC  MOL    20     284.760 219.690 138.180  1.00  0.00            
ATOM   2343  HC  MOL    20     283.080 219.550 138.630  1.00  0.00            
ATOM   2344  HC  MOL    20     283.660 221.080 138.150  1.00  0.00            
ATOM   2345  HC  MOL    20     284.110 220.250 135.860  1.00  0.00            
ATOM   2346  HC  MOL    20     282.410 220.130 136.220  1.00  0.00            
ATOM   2347  HC  MOL    20     280.700 218.760 137.000  1.00  0.00            
ATOM   2348  CT  MOL    20     277.730 218.470 137.880  1.00  0.00            
ATOM   2349  CT  MOL    20     277.910 218.630 139.410  1.00  0.00            
ATOM   2350  HC  MOL    20     278.980 218.560 139.680  1.00  0.00            
ATOM   2351  HC  MOL    20     277.390 217.860 139.950  1.00  0.00            
ATOM   2352  HC  MOL    20     277.580 219.590 139.750  1.00  0.00            
ATOM   2353  HC  MOL    20     276.660 218.380 137.710  1.00  0.00            
ATOM   2354  HC  MOL    20     278.050 219.320 137.290  1.00  0.00            
ATOM   2355  O_2 MOL    20     275.180 215.680 137.940  1.00  0.00            
ATOM   2356  HC  MOL    20     275.640 213.460 136.280  1.00  0.00            
ATOM   2357  HC  MOL    20     276.150 213.050 137.920  1.00  0.00            
ATOM   2358  CT  MOL    20     279.500 209.120 137.120  1.00  0.00            
ATOM   2359  HC  MOL    20     280.420 208.570 137.100  1.00  0.00            
ATOM   2360  HC  MOL    20     279.460 209.730 137.990  1.00  0.00            
ATOM   2361  HC  MOL    20     278.690 208.430 137.200  1.00  0.00            
ATOM   2362  HC  MOL    20     279.190 209.400 135.000  1.00  0.00            
ATOM   2363  CT  MOL    20     285.870 217.850 135.490  1.00  0.00            
ATOM   2364  HC  MOL    20     286.410 218.000 136.420  1.00  0.00            
ATOM   2365  HC  MOL    20     286.390 217.110 134.870  1.00  0.00            
ATOM   2366  HC  MOL    20     285.890 218.810 134.980  1.00  0.00            
ATOM   2367  CT  MOL    20     282.000 209.170 134.840  1.00  0.00            
ATOM   2368  HC  MOL    20     282.120 209.090 133.770  1.00  0.00            
ATOM   2369  HC  MOL    20     281.170 208.520 135.050  1.00  0.00            
ATOM   2370  HC  MOL    20     282.840 208.740 135.340  1.00  0.00            
ATOM   2371  HC  MOL    20     277.590 210.760 137.110  1.00  0.00            
ATOM   2372  CT  MOL    20     276.980 210.790 135.070  1.00  0.00            
ATOM   2373  CT  MOL    20     275.930 209.660 135.350  1.00  0.00            
ATOM   2374  HC  MOL    20     277.500 210.650 134.130  1.00  0.00            
ATOM   2375  HC  MOL    20     276.450 211.720 134.980  1.00  0.00            
ATOM   2376  HC  MOL    20     275.390 209.470 134.450  1.00  0.00            
ATOM   2377  HC  MOL    20     276.470 208.760 135.650  1.00  0.00            
ATOM   2378  C_2 MOL    20     274.930 209.960 136.450  1.00  0.00            
ATOM   2379  OS  MOL    20     274.480 208.870 137.050  1.00  0.00            
ATOM   2380  O_2 MOL    20     274.590 211.070 136.760  1.00  0.00            
ATOM   2381  CT  MOL    20     273.260 208.900 137.850  1.00  0.00            
ATOM   2382  CM  MOL    20     273.360 207.770 138.850  1.00  0.00            
ATOM   2383  CM  MOL    20     272.430 206.970 139.400  1.00  0.00            
ATOM   2384  CT  MOL    20     272.780 206.010 140.540  1.00  0.00            
ATOM   2385  HC  MOL    20     272.410 208.840 137.170  1.00  0.00            
ATOM   2386  HC  MOL    20     273.150 209.840 138.360  1.00  0.00            
ATOM   2387  HC  MOL    20     274.370 207.710 139.270  1.00  0.00            
ATOM   2388  HC  MOL    20     271.980 206.090 141.270  1.00  0.00            
ATOM   2389  HC  MOL    20     272.710 204.970 140.170  1.00  0.00            
ATOM   2390  CT  MOL    20     270.970 206.920 139.000  1.00  0.00            
ATOM   2391  HC  MOL    20     270.690 207.590 138.190  1.00  0.00            
ATOM   2392  HC  MOL    20     270.290 207.120 139.820  1.00  0.00            
ATOM   2393  HC  MOL    20     270.750 205.930 138.670  1.00  0.00            
ATOM   2394  CT  MOL    20     274.170 206.150 141.200  1.00  0.00            
ATOM   2395  CM  MOL    20     274.420 205.200 142.320  1.00  0.00            
ATOM   2396  CM  MOL    20     274.770 205.410 143.590  1.00  0.00            
ATOM   2397  CT  MOL    20     274.970 204.250 144.550  1.00  0.00            
ATOM   2398  HC  MOL    20     274.950 206.020 140.450  1.00  0.00            
ATOM   2399  HC  MOL    20     274.290 207.160 141.540  1.00  0.00            
ATOM   2400  HC  MOL    20     274.270 204.170 142.060  1.00  0.00            
ATOM   2401  HC  MOL    20     275.950 204.310 144.990  1.00  0.00            
ATOM   2402  HC  MOL    20     274.980 203.300 144.030  1.00  0.00            
ATOM   2403  CT  MOL    20     275.040 206.780 144.180  1.00  0.00            
ATOM   2404  HC  MOL    20     275.320 207.540 143.460  1.00  0.00            
ATOM   2405  HC  MOL    20     275.820 206.780 144.930  1.00  0.00            
ATOM   2406  HC  MOL    20     274.170 207.170 144.730  1.00  0.00            
ATOM   2407  CT  MOL    20     273.890 204.100 145.670  1.00  0.00            
ATOM   2408  CM  MOL    20     274.050 202.800 146.450  1.00  0.00            
ATOM   2409  CM  MOL    20     273.290 201.710 146.490  1.00  0.00            
ATOM   2410  CT  MOL    20     273.710 200.500 147.270  1.00  0.00            
ATOM   2411  HC  MOL    20     273.940 204.950 146.360  1.00  0.00            
ATOM   2412  HC  MOL    20     272.900 204.200 145.220  1.00  0.00            
ATOM   2413  HC  MOL    20     274.960 202.770 147.030  1.00  0.00            
ATOM   2414  HC  MOL    20     272.980 200.230 148.030  1.00  0.00            
ATOM   2415  HC  MOL    20     274.640 200.660 147.790  1.00  0.00            
ATOM   2416  HC  MOL    20     273.850 199.620 146.630  1.00  0.00            
ATOM   2417  CT  MOL    20     271.980 201.520 145.790  1.00  0.00            
ATOM   2418  HC  MOL    20     272.010 200.840 144.960  1.00  0.00            
ATOM   2419  HC  MOL    20     271.570 202.450 145.450  1.00  0.00            
ATOM   2420  HC  MOL    20     271.230 201.130 146.460  1.00  0.00            
ATOM   2421  CS  MOL    21     306.930 208.100 139.040  1.00  0.00            
ATOM   2422  CW  MOL    21     305.500 208.690 139.400  1.00  0.00            
ATOM   2423  NA  MOL    21     304.590 207.560 139.570  1.00  0.00            
ATOM   2424  CW  MOL    21     305.360 206.280 139.350  1.00  0.00            
ATOM   2425  CS  MOL    21     306.850 206.670 139.100  1.00  0.00            
ATOM   2426  CM  MOL    21     304.880 205.030 139.270  1.00  0.00            
ATOM   2427  CW  MOL    21     303.550 204.560 139.490  1.00  0.00            
ATOM   2428  CS  MOL    21     303.150 203.080 139.400  1.00  0.00            
ATOM   2429  CS  MOL    21     301.770 202.980 139.890  1.00  0.00            
ATOM   2430  CW  MOL    21     301.310 204.390 140.280  1.00  0.00            
ATOM   2431  NA  MOL    21     302.440 205.340 139.940  1.00  0.00            
ATOM   2432  CM  MOL    21     300.100 204.780 140.760  1.00  0.00            
ATOM   2433  CW  MOL    21     299.710 206.080 141.030  1.00  0.00            
ATOM   2434  CS  MOL    21     298.410 206.620 141.510  1.00  0.00            
ATOM   2435  CS  MOL    21     298.550 208.150 141.530  1.00  0.00            
ATOM   2436  CW  MOL    21     300.000 208.450 141.110  1.00  0.00            
ATOM   2437  NA  MOL    21     300.690 207.240 140.830  1.00  0.00            
ATOM   2438  CM  MOL    21     300.310 209.920 141.100  1.00  0.00            
ATOM   2439  CT  MOL    21     298.920 210.640 141.580  1.00  0.00            
ATOM   2440  C_2 MOL    21     297.790 209.460 141.840  1.00  0.00            
ATOM   2441  CW  MOL    21     301.500 210.420 140.730  1.00  0.00            
ATOM   2442  NA  MOL    21     302.700 209.630 140.230  1.00  0.00            
ATOM   2443  CW  MOL    21     303.780 210.440 139.880  1.00  0.00            
ATOM   2444  CT  MOL    21     303.330 212.010 140.000  1.00  0.00            
ATOM   2445  CT  MOL    21     301.840 211.980 140.660  1.00  0.00            
ATOM   2446  CM  MOL    21     305.120 210.030 139.520  1.00  0.00            
ATOM   2447  MG  MOL    21     302.560 207.470 139.950  1.00  0.00            
ATOM   2448  CT  MOL    21     308.160 208.850 138.670  1.00  0.00            
ATOM   2449  HC  MOL    21     307.990 209.580 137.840  1.00  0.00            
ATOM   2450  HC  MOL    21     308.620 209.340 139.510  1.00  0.00            
ATOM   2451  HC  MOL    21     308.870 208.170 138.260  1.00  0.00            
ATOM   2452  CT  MOL    21     307.940 205.610 138.920  1.00  0.00            
ATOM   2453  OH  MOL    21     309.110 205.870 139.700  1.00  0.00            
ATOM   2454  HO  MOL    21     309.310 206.780 139.530  1.00  0.00            
ATOM   2455  CT  MOL    21     308.290 205.370 137.470  1.00  0.00            
ATOM   2456  HC  MOL    21     308.890 206.220 137.070  1.00  0.00            
ATOM   2457  HC  MOL    21     307.400 205.200 136.870  1.00  0.00            
ATOM   2458  HC  MOL    21     308.900 204.490 137.330  1.00  0.00            
ATOM   2459  HC  MOL    21     307.590 204.710 139.350  1.00  0.00            
ATOM   2460  HC  MOL    21     305.550 204.230 139.000  1.00  0.00            
ATOM   2461  CT  MOL    21     300.930 201.740 140.030  1.00  0.00            
ATOM   2462  CT  MOL    21     301.090 201.060 141.420  1.00  0.00            
ATOM   2463  HC  MOL    21     302.070 200.650 141.510  1.00  0.00            
ATOM   2464  HC  MOL    21     300.340 200.280 141.530  1.00  0.00            
ATOM   2465  HC  MOL    21     300.920 201.760 142.240  1.00  0.00            
ATOM   2466  HC  MOL    21     301.210 201.000 139.300  1.00  0.00            
ATOM   2467  HC  MOL    21     299.900 202.000 139.840  1.00  0.00            
ATOM   2468  HC  MOL    21     299.390 203.990 140.870  1.00  0.00            
ATOM   2469  CT  MOL    21     297.220 205.790 141.890  1.00  0.00            
ATOM   2470  CT  MOL    21     296.040 206.500 142.510  1.00  0.00            
ATOM   2471  HC  MOL    21     296.290 207.100 143.410  1.00  0.00            
ATOM   2472  HC  MOL    21     295.310 205.760 142.750  1.00  0.00            
ATOM   2473  HC  MOL    21     295.600 207.180 141.770  1.00  0.00            
ATOM   2474  HC  MOL    21     297.530 205.000 142.590  1.00  0.00            
ATOM   2475  HC  MOL    21     296.870 205.250 141.010  1.00  0.00            
ATOM   2476  O_2 MOL    21     296.670 209.680 142.220  1.00  0.00            
ATOM   2477  HC  MOL    21     299.010 211.200 142.500  1.00  0.00            
ATOM   2478  HC  MOL    21     298.520 211.330 140.840  1.00  0.00            
ATOM   2479  CT  MOL    21     303.240 212.650 138.590  1.00  0.00            
ATOM   2480  HC  MOL    21     304.220 212.850 138.140  1.00  0.00            
ATOM   2481  HC  MOL    21     302.680 212.070 137.860  1.00  0.00            
ATOM   2482  HC  MOL    21     302.770 213.620 138.650  1.00  0.00            
ATOM   2483  HC  MOL    21     304.010 212.570 140.650  1.00  0.00            
ATOM   2484  CT  MOL    21     304.050 201.940 138.930  1.00  0.00            
ATOM   2485  HC  MOL    21     303.900 201.000 139.450  1.00  0.00            
ATOM   2486  HC  MOL    21     303.860 201.790 137.880  1.00  0.00            
ATOM   2487  HC  MOL    21     305.120 202.140 139.040  1.00  0.00            
ATOM   2488  CT  MOL    21     306.190 211.130 139.340  1.00  0.00            
ATOM   2489  HC  MOL    21     306.500 211.180 138.310  1.00  0.00            
ATOM   2490  HC  MOL    21     307.080 210.990 139.960  1.00  0.00            
ATOM   2491  HC  MOL    21     305.830 212.120 139.510  1.00  0.00            
ATOM   2492  HC  MOL    21     301.130 212.510 140.020  1.00  0.00            
ATOM   2493  CT  MOL    21     301.690 212.660 142.050  1.00  0.00            
ATOM   2494  CT  MOL    21     300.790 213.910 142.130  1.00  0.00            
ATOM   2495  HC  MOL    21     302.660 212.970 142.380  1.00  0.00            
ATOM   2496  HC  MOL    21     301.340 211.940 142.780  1.00  0.00            
ATOM   2497  HC  MOL    21     299.760 213.650 141.890  1.00  0.00            
ATOM   2498  HC  MOL    21     300.800 214.220 143.170  1.00  0.00            
ATOM   2499  C_2 MOL    21     301.170 215.110 141.330  1.00  0.00            
ATOM   2500  OS  MOL    21     300.200 216.050 141.300  1.00  0.00            
ATOM   2501  O_2 MOL    21     302.140 215.150 140.660  1.00  0.00            
ATOM   2502  CT  MOL    21     300.400 217.260 140.550  1.00  0.00            
ATOM   2503  CM  MOL    21     299.200 218.110 140.790  1.00  0.00            
ATOM   2504  CM  MOL    21     298.450 218.850 139.970  1.00  0.00            
ATOM   2505  CT  MOL    21     297.190 219.520 140.550  1.00  0.00            
ATOM   2506  HC  MOL    21     300.550 217.020 139.510  1.00  0.00            
ATOM   2507  HC  MOL    21     301.320 217.770 140.870  1.00  0.00            
ATOM   2508  HC  MOL    21     298.940 218.130 141.840  1.00  0.00            
ATOM   2509  HC  MOL    21     296.310 219.230 139.950  1.00  0.00            
ATOM   2510  HC  MOL    21     297.020 219.130 141.560  1.00  0.00            
ATOM   2511  CT  MOL    21     298.630 218.970 138.490  1.00  0.00            
ATOM   2512  HC  MOL    21     299.560 218.570 138.090  1.00  0.00            
ATOM   2513  HC  MOL    21     298.690 220.040 138.260  1.00  0.00            
ATOM   2514  HC  MOL    21     297.800 218.510 137.980  1.00  0.00            
ATOM   2515  CT  MOL    21     297.300 221.050 140.680  1.00  0.00            
ATOM   2516  CM  MOL    21     296.150 221.670 141.430  1.00  0.00            
ATOM   2517  CM  MOL    21     296.100 222.490 142.470  1.00  0.00            
ATOM   2518  CT  MOL    21     294.730 222.980 143.020  1.00  0.00            
ATOM   2519  HC  MOL    21     298.240 221.300 141.200  1.00  0.00            
ATOM   2520  HC  MOL    21     297.400 221.540 139.730  1.00  0.00            
ATOM   2521  HC  MOL    21     295.190 221.400 141.030  1.00  0.00            
ATOM   2522  HC  MOL    21     293.970 222.740 142.280  1.00  0.00            
ATOM   2523  HC  MOL    21     294.750 224.080 143.090  1.00  0.00            
ATOM   2524  CT  MOL    21     297.310 223.020 143.220  1.00  0.00            
ATOM   2525  HC  MOL    21     298.250 222.530 142.970  1.00  0.00            
ATOM   2526  HC  MOL    21     297.200 222.980 144.270  1.00  0.00            
ATOM   2527  HC  MOL    21     297.390 224.060 142.940  1.00  0.00            
ATOM   2528  CT  MOL    21     294.250 222.400 144.380  1.00  0.00            
ATOM   2529  CM  MOL    21     292.820 222.730 144.700  1.00  0.00            
ATOM   2530  CM  MOL    21     292.310 223.410 145.740  1.00  0.00            
ATOM   2531  CT  MOL    21     290.800 223.610 145.890  1.00  0.00            
ATOM   2532  HC  MOL    21     294.360 221.340 144.330  1.00  0.00            
ATOM   2533  HC  MOL    21     294.930 222.790 145.150  1.00  0.00            
ATOM   2534  HC  MOL    21     292.060 222.390 143.970  1.00  0.00            
ATOM   2535  HC  MOL    21     290.390 223.090 146.760  1.00  0.00            
ATOM   2536  HC  MOL    21     290.250 223.280 145.020  1.00  0.00            
ATOM   2537  HC  MOL    21     290.600 224.660 146.020  1.00  0.00            
ATOM   2538  CT  MOL    21     293.070 223.940 146.920  1.00  0.00            
ATOM   2539  HC  MOL    21     294.070 223.520 146.990  1.00  0.00            
ATOM   2540  HC  MOL    21     292.530 223.700 147.850  1.00  0.00            
ATOM   2541  HC  MOL    21     293.260 225.000 146.850  1.00  0.00            
ATOM   2542  CS  MOL    22     298.650 206.700 137.580  1.00  0.00            
ATOM   2543  CW  MOL    22     297.140 207.010 137.980  1.00  0.00            
ATOM   2544  NA  MOL    22     297.040 208.460 138.160  1.00  0.00            
ATOM   2545  CW  MOL    22     298.360 209.090 137.880  1.00  0.00            
ATOM   2546  CS  MOL    22     299.370 207.950 137.550  1.00  0.00            
ATOM   2547  CM  MOL    22     298.680 210.410 137.860  1.00  0.00            
ATOM   2548  CW  MOL    22     297.840 211.540 138.120  1.00  0.00            
ATOM   2549  CS  MOL    22     298.300 213.020 138.150  1.00  0.00            
ATOM   2550  CS  MOL    22     297.150 213.820 138.570  1.00  0.00            
ATOM   2551  CW  MOL    22     295.970 212.880 138.780  1.00  0.00            
ATOM   2552  NA  MOL    22     296.440 211.480 138.490  1.00  0.00            
ATOM   2553  CM  MOL    22     294.730 213.220 139.200  1.00  0.00            
ATOM   2554  CW  MOL    22     293.680 212.330 139.420  1.00  0.00            
ATOM   2555  CS  MOL    22     292.280 212.590 139.900  1.00  0.00            
ATOM   2556  CS  MOL    22     291.570 211.250 139.920  1.00  0.00            
ATOM   2557  CW  MOL    22     292.610 210.220 139.440  1.00  0.00            
ATOM   2558  NA  MOL    22     293.830 210.860 139.090  1.00  0.00            
ATOM   2559  CM  MOL    22     292.060 208.820 139.480  1.00  0.00            
ATOM   2560  CT  MOL    22     290.520 208.960 140.000  1.00  0.00            
ATOM   2561  C_2 MOL    22     290.260 210.560 140.310  1.00  0.00            
ATOM   2562  CW  MOL    22     292.780 207.740 139.190  1.00  0.00            
ATOM   2563  NA  MOL    22     294.250 207.770 138.810  1.00  0.00            
ATOM   2564  CW  MOL    22     294.770 206.470 138.630  1.00  0.00            
ATOM   2565  CT  MOL    22     293.610 205.370 138.970  1.00  0.00            
ATOM   2566  CT  MOL    22     292.280 206.250 139.280  1.00  0.00            
ATOM   2567  CM  MOL    22     296.100 206.080 138.210  1.00  0.00            
ATOM   2568  MG  MOL    22     295.370 209.630 138.430  1.00  0.00            
ATOM   2569  CT  MOL    22     299.290 205.390 137.230  1.00  0.00            
ATOM   2570  HC  MOL    22     299.240 204.690 138.060  1.00  0.00            
ATOM   2571  HC  MOL    22     298.810 204.900 136.400  1.00  0.00            
ATOM   2572  HC  MOL    22     300.330 205.490 136.960  1.00  0.00            
ATOM   2573  CT  MOL    22     300.840 208.230 137.200  1.00  0.00            
ATOM   2574  OH  MOL    22     301.750 207.440 137.960  1.00  0.00            
ATOM   2575  HO  MOL    22     301.510 206.500 137.870  1.00  0.00            
ATOM   2576  CT  MOL    22     301.140 208.140 135.720  1.00  0.00            
ATOM   2577  HC  MOL    22     301.030 207.160 135.290  1.00  0.00            
ATOM   2578  HC  MOL    22     302.190 208.420 135.560  1.00  0.00            
ATOM   2579  HC  MOL    22     300.520 208.810 135.160  1.00  0.00            
ATOM   2580  HC  MOL    22     301.100 209.250 137.500  1.00  0.00            
ATOM   2581  HC  MOL    22     299.690 210.690 137.580  1.00  0.00            
ATOM   2582  CT  MOL    22     297.060 215.290 138.790  1.00  0.00            
ATOM   2583  CT  MOL    22     296.920 215.640 140.280  1.00  0.00            
ATOM   2584  HC  MOL    22     297.740 215.320 140.910  1.00  0.00            
ATOM   2585  HC  MOL    22     296.030 215.210 140.670  1.00  0.00            
ATOM   2586  HC  MOL    22     296.770 216.700 140.390  1.00  0.00            
ATOM   2587  HC  MOL    22     297.940 215.790 138.410  1.00  0.00            
ATOM   2588  HC  MOL    22     296.230 215.690 138.250  1.00  0.00            
ATOM   2589  HC  MOL    22     294.520 214.230 139.430  1.00  0.00            
ATOM   2590  CT  MOL    22     291.690 213.910 140.310  1.00  0.00            
ATOM   2591  CT  MOL    22     292.030 214.310 141.760  1.00  0.00            
ATOM   2592  HC  MOL    22     293.110 214.310 141.950  1.00  0.00            
ATOM   2593  HC  MOL    22     291.640 213.560 142.440  1.00  0.00            
ATOM   2594  HC  MOL    22     291.630 215.300 141.990  1.00  0.00            
ATOM   2595  HC  MOL    22     290.610 213.900 140.180  1.00  0.00            
ATOM   2596  HC  MOL    22     292.040 214.680 139.610  1.00  0.00            
ATOM   2597  O_2 MOL    22     289.240 211.010 140.740  1.00  0.00            
ATOM   2598  HC  MOL    22     289.780 208.660 139.270  1.00  0.00            
ATOM   2599  HC  MOL    22     290.280 208.370 140.900  1.00  0.00            
ATOM   2600  CT  MOL    22     293.950 204.540 140.260  1.00  0.00            
ATOM   2601  HC  MOL    22     294.870 203.950 140.220  1.00  0.00            
ATOM   2602  HC  MOL    22     294.000 205.190 141.100  1.00  0.00            
ATOM   2603  HC  MOL    22     293.160 203.830 140.420  1.00  0.00            
ATOM   2604  HC  MOL    22     293.420 204.710 138.150  1.00  0.00            
ATOM   2605  CT  MOL    22     299.680 213.520 137.860  1.00  0.00            
ATOM   2606  HC  MOL    22     299.640 214.100 136.930  1.00  0.00            
ATOM   2607  HC  MOL    22     300.040 214.170 138.660  1.00  0.00            
ATOM   2608  HC  MOL    22     300.390 212.740 137.700  1.00  0.00            
ATOM   2609  CT  MOL    22     296.370 204.590 138.010  1.00  0.00            
ATOM   2610  HC  MOL    22     296.820 204.380 137.050  1.00  0.00            
ATOM   2611  HC  MOL    22     295.550 203.910 138.060  1.00  0.00            
ATOM   2612  HC  MOL    22     297.030 204.220 138.780  1.00  0.00            
ATOM   2613  HC  MOL    22     291.910 206.160 140.280  1.00  0.00            
ATOM   2614  CT  MOL    22     291.100 205.930 138.310  1.00  0.00            
ATOM   2615  CT  MOL    22     290.350 204.600 138.530  1.00  0.00            
ATOM   2616  HC  MOL    22     291.390 206.070 137.260  1.00  0.00            
ATOM   2617  HC  MOL    22     290.330 206.670 138.440  1.00  0.00            
ATOM   2618  HC  MOL    22     289.620 204.390 137.720  1.00  0.00            
ATOM   2619  HC  MOL    22     291.060 203.780 138.420  1.00  0.00            
ATOM   2620  C_2 MOL    22     289.690 204.470 139.900  1.00  0.00            
ATOM   2621  OS  MOL    22     288.420 204.970 139.960  1.00  0.00            
ATOM   2622  O_2 MOL    22     290.170 203.830 140.790  1.00  0.00            
ATOM   2623  CT  MOL    22     287.590 204.880 141.130  1.00  0.00            
ATOM   2624  CM  MOL    22     286.980 203.490 141.150  1.00  0.00            
ATOM   2625  CM  MOL    22     285.710 203.110 141.040  1.00  0.00            
ATOM   2626  CT  MOL    22     285.420 201.590 141.020  1.00  0.00            
ATOM   2627  HC  MOL    22     286.830 205.640 141.040  1.00  0.00            
ATOM   2628  HC  MOL    22     288.160 205.140 142.010  1.00  0.00            
ATOM   2629  HC  MOL    22     287.740 202.710 141.310  1.00  0.00            
ATOM   2630  HC  MOL    22     284.710 201.390 140.190  1.00  0.00            
ATOM   2631  HC  MOL    22     286.280 201.000 140.760  1.00  0.00            
ATOM   2632  CT  MOL    22     284.500 203.980 140.840  1.00  0.00            
ATOM   2633  HC  MOL    22     284.710 205.020 140.690  1.00  0.00            
ATOM   2634  HC  MOL    22     283.850 203.920 141.720  1.00  0.00            
ATOM   2635  HC  MOL    22     283.960 203.640 139.950  1.00  0.00            
ATOM   2636  CT  MOL    22     284.840 201.040 142.340  1.00  0.00            
ATOM   2637  CM  MOL    22     285.770 201.170 143.540  1.00  0.00            
ATOM   2638  CM  MOL    22     285.950 200.360 144.580  1.00  0.00            
ATOM   2639  CT  MOL    22     286.880 200.810 145.720  1.00  0.00            
ATOM   2640  HC  MOL    22     283.920 201.590 142.560  1.00  0.00            
ATOM   2641  HC  MOL    22     284.460 200.030 142.200  1.00  0.00            
ATOM   2642  HC  MOL    22     286.330 202.070 143.500  1.00  0.00            
ATOM   2643  HC  MOL    22     286.360 200.690 146.650  1.00  0.00            
ATOM   2644  HC  MOL    22     287.120 201.870 145.620  1.00  0.00            
ATOM   2645  CT  MOL    22     285.260 199.020 144.770  1.00  0.00            
ATOM   2646  HC  MOL    22     284.550 198.740 144.030  1.00  0.00            
ATOM   2647  HC  MOL    22     284.770 198.890 145.730  1.00  0.00            
ATOM   2648  HC  MOL    22     285.990 198.250 144.760  1.00  0.00            
ATOM   2649  CT  MOL    22     288.260 200.070 145.870  1.00  0.00            
ATOM   2650  CM  MOL    22     289.020 200.500 147.130  1.00  0.00            
ATOM   2651  CM  MOL    22     289.490 199.780 148.180  1.00  0.00            
ATOM   2652  CT  MOL    22     290.080 200.470 149.390  1.00  0.00            
ATOM   2653  HC  MOL    22     288.000 199.020 145.940  1.00  0.00            
ATOM   2654  HC  MOL    22     288.900 200.170 145.000  1.00  0.00            
ATOM   2655  HC  MOL    22     289.100 201.590 147.240  1.00  0.00            
ATOM   2656  HC  MOL    22     289.650 200.120 150.310  1.00  0.00            
ATOM   2657  HC  MOL    22     290.030 201.550 149.430  1.00  0.00            
ATOM   2658  HC  MOL    22     291.130 200.190 149.540  1.00  0.00            
ATOM   2659  CT  MOL    22     289.420 198.270 148.320  1.00  0.00            
ATOM   2660  HC  MOL    22     290.380 197.810 148.550  1.00  0.00            
ATOM   2661  HC  MOL    22     289.020 197.810 147.410  1.00  0.00            
ATOM   2662  HC  MOL    22     288.700 198.040 149.100  1.00  0.00            
ATOM   2663  CS  MOL    23     321.000 206.600 142.900  1.00  0.00            
ATOM   2664  CW  MOL    23     319.460 206.860 143.210  1.00  0.00            
ATOM   2665  NA  MOL    23     318.830 205.540 143.340  1.00  0.00            
ATOM   2666  CW  MOL    23     319.860 204.490 143.120  1.00  0.00            
ATOM   2667  CS  MOL    23     321.240 205.180 142.960  1.00  0.00            
ATOM   2668  CM  MOL    23     319.660 203.160 142.950  1.00  0.00            
ATOM   2669  CW  MOL    23     318.430 202.420 143.010  1.00  0.00            
ATOM   2670  CS  MOL    23     318.300 200.900 142.760  1.00  0.00            
ATOM   2671  CS  MOL    23     316.940 200.500 143.140  1.00  0.00            
ATOM   2672  CW  MOL    23     316.200 201.770 143.570  1.00  0.00            
ATOM   2673  NA  MOL    23     317.170 202.930 143.460  1.00  0.00            
ATOM   2674  CM  MOL    23     314.930 201.880 144.020  1.00  0.00            
ATOM   2675  CW  MOL    23     314.300 203.120 144.400  1.00  0.00            
ATOM   2676  CS  MOL    23     312.920 203.350 144.930  1.00  0.00            
ATOM   2677  CS  MOL    23     312.760 204.870 145.020  1.00  0.00            
ATOM   2678  CW  MOL    23     314.100 205.470 144.590  1.00  0.00            
ATOM   2679  NA  MOL    23     315.020 204.440 144.250  1.00  0.00            
ATOM   2680  CM  MOL    23     314.090 206.960 144.610  1.00  0.00            
ATOM   2681  CT  MOL    23     312.590 207.400 145.120  1.00  0.00            
ATOM   2682  C_2 MOL    23     311.770 206.010 145.370  1.00  0.00            
ATOM   2683  CW  MOL    23     315.110 207.720 144.250  1.00  0.00            
ATOM   2684  NA  MOL    23     316.450 207.190 143.830  1.00  0.00            
ATOM   2685  CW  MOL    23     317.370 208.220 143.570  1.00  0.00            
ATOM   2686  CT  MOL    23     316.630 209.650 143.610  1.00  0.00            
ATOM   2687  CT  MOL    23     315.120 209.320 144.160  1.00  0.00            
ATOM   2688  CM  MOL    23     318.780 208.090 143.310  1.00  0.00            
ATOM   2689  MG  MOL    23     316.850 205.030 143.470  1.00  0.00            
ATOM   2690  CT  MOL    23     322.090 207.600 142.520  1.00  0.00            
ATOM   2691  HC  MOL    23     321.730 208.340 141.820  1.00  0.00            
ATOM   2692  HC  MOL    23     322.510 208.080 143.390  1.00  0.00            
ATOM   2693  HC  MOL    23     322.870 207.140 141.960  1.00  0.00            
ATOM   2694  CT  MOL    23     322.530 204.380 142.800  1.00  0.00            
ATOM   2695  OH  MOL    23     323.570 204.980 143.560  1.00  0.00            
ATOM   2696  HO  MOL    23     323.610 205.910 143.370  1.00  0.00            
ATOM   2697  CT  MOL    23     322.890 204.150 141.360  1.00  0.00            
ATOM   2698  HC  MOL    23     323.050 205.110 140.870  1.00  0.00            
ATOM   2699  HC  MOL    23     322.040 203.720 140.830  1.00  0.00            
ATOM   2700  HC  MOL    23     323.750 203.490 141.250  1.00  0.00            
ATOM   2701  HC  MOL    23     322.340 203.410 143.290  1.00  0.00            
ATOM   2702  HC  MOL    23     320.500 202.560 142.740  1.00  0.00            
ATOM   2703  CT  MOL    23     316.310 199.140 143.030  1.00  0.00            
ATOM   2704  CT  MOL    23     316.020 198.440 144.350  1.00  0.00            
ATOM   2705  HC  MOL    23     316.960 198.280 144.870  1.00  0.00            
ATOM   2706  HC  MOL    23     315.560 197.500 144.120  1.00  0.00            
ATOM   2707  HC  MOL    23     315.360 199.010 144.980  1.00  0.00            
ATOM   2708  HC  MOL    23     316.920 198.490 142.400  1.00  0.00            
ATOM   2709  HC  MOL    23     315.380 199.240 142.480  1.00  0.00            
ATOM   2710  HC  MOL    23     314.330 200.990 144.080  1.00  0.00            
ATOM   2711  CT  MOL    23     311.910 202.310 145.320  1.00  0.00            
ATOM   2712  CT  MOL    23     310.560 202.840 145.760  1.00  0.00            
ATOM   2713  HC  MOL    23     310.710 203.540 146.540  1.00  0.00            
ATOM   2714  HC  MOL    23     309.910 202.070 146.190  1.00  0.00            
ATOM   2715  HC  MOL    23     310.040 203.350 144.960  1.00  0.00            
ATOM   2716  HC  MOL    23     312.410 201.750 146.120  1.00  0.00            
ATOM   2717  HC  MOL    23     311.800 201.570 144.530  1.00  0.00            
ATOM   2718  O_2 MOL    23     310.640 205.980 145.770  1.00  0.00            
ATOM   2719  HC  MOL    23     312.560 208.020 146.010  1.00  0.00            
ATOM   2720  HC  MOL    23     312.080 207.990 144.390  1.00  0.00            
ATOM   2721  CT  MOL    23     316.510 210.210 142.150  1.00  0.00            
ATOM   2722  HC  MOL    23     317.470 210.440 141.680  1.00  0.00            
ATOM   2723  HC  MOL    23     315.970 209.520 141.510  1.00  0.00            
ATOM   2724  HC  MOL    23     315.990 211.160 142.140  1.00  0.00            
ATOM   2725  HC  MOL    23     317.120 210.380 144.260  1.00  0.00            
ATOM   2726  CT  MOL    23     319.390 199.960 142.250  1.00  0.00            
ATOM   2727  HC  MOL    23     319.160 198.970 142.600  1.00  0.00            
ATOM   2728  HC  MOL    23     319.450 199.980 141.180  1.00  0.00            
ATOM   2729  HC  MOL    23     320.350 200.220 142.620  1.00  0.00            
ATOM   2730  CT  MOL    23     319.580 209.390 143.100  1.00  0.00            
ATOM   2731  HC  MOL    23     319.740 209.580 142.060  1.00  0.00            
ATOM   2732  HC  MOL    23     320.570 209.430 143.590  1.00  0.00            
ATOM   2733  HC  MOL    23     319.090 210.260 143.480  1.00  0.00            
ATOM   2734  HC  MOL    23     314.380 209.640 143.450  1.00  0.00            
ATOM   2735  CT  MOL    23     314.780 210.050 145.490  1.00  0.00            
ATOM   2736  CT  MOL    23     313.730 211.190 145.470  1.00  0.00            
ATOM   2737  HC  MOL    23     315.700 210.390 146.020  1.00  0.00            
ATOM   2738  HC  MOL    23     314.400 209.310 146.180  1.00  0.00            
ATOM   2739  HC  MOL    23     312.810 210.880 144.990  1.00  0.00            
ATOM   2740  HC  MOL    23     313.500 211.470 146.480  1.00  0.00            
ATOM   2741  C_2 MOL    23     314.160 212.480 144.800  1.00  0.00            
ATOM   2742  OS  MOL    23     313.110 213.310 144.550  1.00  0.00            
ATOM   2743  O_2 MOL    23     315.220 212.610 144.290  1.00  0.00            
ATOM   2744  CT  MOL    23     313.310 214.540 143.850  1.00  0.00            
ATOM   2745  CM  MOL    23     312.040 214.710 143.040  1.00  0.00            
ATOM   2746  CM  MOL    23     311.930 214.910 141.730  1.00  0.00            
ATOM   2747  CT  MOL    23     310.570 214.890 141.070  1.00  0.00            
ATOM   2748  HC  MOL    23     314.220 214.590 143.270  1.00  0.00            
ATOM   2749  HC  MOL    23     313.410 215.320 144.650  1.00  0.00            
ATOM   2750  HC  MOL    23     311.160 214.550 143.630  1.00  0.00            
ATOM   2751  HC  MOL    23     310.620 214.370 140.130  1.00  0.00            
ATOM   2752  HC  MOL    23     309.910 214.310 141.670  1.00  0.00            
ATOM   2753  CT  MOL    23     313.070 215.140 140.780  1.00  0.00            
ATOM   2754  HC  MOL    23     314.080 215.190 141.200  1.00  0.00            
ATOM   2755  HC  MOL    23     312.970 216.070 140.200  1.00  0.00            
ATOM   2756  HC  MOL    23     313.080 214.380 140.040  1.00  0.00            
ATOM   2757  CT  MOL    23     309.880 216.260 140.890  1.00  0.00            
ATOM   2758  CM  MOL    23     308.500 216.090 140.330  1.00  0.00            
ATOM   2759  CM  MOL    23     308.010 216.480 139.150  1.00  0.00            
ATOM   2760  CT  MOL    23     306.620 216.030 138.720  1.00  0.00            
ATOM   2761  HC  MOL    23     309.770 216.720 141.850  1.00  0.00            
ATOM   2762  HC  MOL    23     310.490 216.970 140.330  1.00  0.00            
ATOM   2763  HC  MOL    23     307.820 215.570 140.980  1.00  0.00            
ATOM   2764  HC  MOL    23     306.240 215.290 139.390  1.00  0.00            
ATOM   2765  HC  MOL    23     306.660 215.510 137.750  1.00  0.00            
ATOM   2766  CT  MOL    23     308.770 217.220 138.080  1.00  0.00            
ATOM   2767  HC  MOL    23     309.820 217.470 138.280  1.00  0.00            
ATOM   2768  HC  MOL    23     308.310 218.140 137.780  1.00  0.00            
ATOM   2769  HC  MOL    23     308.830 216.610 137.170  1.00  0.00            
ATOM   2770  CT  MOL    23     305.600 217.200 138.650  1.00  0.00            
ATOM   2771  CM  MOL    23     304.200 216.720 138.300  1.00  0.00            
ATOM   2772  CM  MOL    23     303.350 217.070 137.340  1.00  0.00            
ATOM   2773  CT  MOL    23     301.990 216.380 137.200  1.00  0.00            
ATOM   2774  HC  MOL    23     305.590 217.680 139.630  1.00  0.00            
ATOM   2775  HC  MOL    23     305.950 217.930 137.930  1.00  0.00            
ATOM   2776  HC  MOL    23     303.840 215.950 138.960  1.00  0.00            
ATOM   2777  HC  MOL    23     301.210 217.100 137.260  1.00  0.00            
ATOM   2778  HC  MOL    23     301.850 215.620 137.970  1.00  0.00            
ATOM   2779  HC  MOL    23     301.910 215.870 136.230  1.00  0.00            
ATOM   2780  CT  MOL    23     303.580 218.140 136.300  1.00  0.00            
ATOM   2781  HC  MOL    23     304.510 218.680 136.380  1.00  0.00            
ATOM   2782  HC  MOL    23     302.810 218.880 136.350  1.00  0.00            
ATOM   2783  HC  MOL    23     303.500 217.740 135.290  1.00  0.00            
ATOM   2784  CS  MOL    24     313.420 203.590 140.960  1.00  0.00            
ATOM   2785  CW  MOL    24     311.880 203.550 141.360  1.00  0.00            
ATOM   2786  NA  MOL    24     311.450 204.920 141.580  1.00  0.00            
ATOM   2787  CW  MOL    24     312.580 205.850 141.300  1.00  0.00            
ATOM   2788  CS  MOL    24     313.830 204.970 140.980  1.00  0.00            
ATOM   2789  CM  MOL    24     312.590 207.220 141.320  1.00  0.00            
ATOM   2790  CW  MOL    24     311.480 208.090 141.570  1.00  0.00            
ATOM   2791  CS  MOL    24     311.600 209.620 141.580  1.00  0.00            
ATOM   2792  CS  MOL    24     310.280 210.140 141.910  1.00  0.00            
ATOM   2793  CW  MOL    24     309.330 208.960 142.100  1.00  0.00            
ATOM   2794  NA  MOL    24     310.140 207.690 141.860  1.00  0.00            
ATOM   2795  CM  MOL    24     308.020 209.050 142.410  1.00  0.00            
ATOM   2796  CW  MOL    24     307.180 207.950 142.570  1.00  0.00            
ATOM   2797  CS  MOL    24     305.730 207.850 142.880  1.00  0.00            
ATOM   2798  CS  MOL    24     305.370 206.390 142.980  1.00  0.00            
ATOM   2799  CW  MOL    24     306.680 205.620 142.670  1.00  0.00            
ATOM   2800  NA  MOL    24     307.750 206.540 142.410  1.00  0.00            
ATOM   2801  CM  MOL    24     306.460 204.130 142.700  1.00  0.00            
ATOM   2802  CT  MOL    24     304.880 203.940 143.130  1.00  0.00            
ATOM   2803  C_2 MOL    24     304.230 205.430 143.320  1.00  0.00            
ATOM   2804  CW  MOL    24     307.440 203.240 142.490  1.00  0.00            
ATOM   2805  NA  MOL    24     308.860 203.580 142.170  1.00  0.00            
ATOM   2806  CW  MOL    24     309.650 202.440 141.900  1.00  0.00            
ATOM   2807  CT  MOL    24     308.790 201.110 142.170  1.00  0.00            
ATOM   2808  CT  MOL    24     307.290 201.650 142.580  1.00  0.00            
ATOM   2809  CM  MOL    24     311.030 202.400 141.480  1.00  0.00            
ATOM   2810  MG  MOL    24     309.540 205.630 141.800  1.00  0.00            
ATOM   2811  CT  MOL    24     314.300 202.410 140.570  1.00  0.00            
ATOM   2812  HC  MOL    24     314.170 201.560 141.250  1.00  0.00            
ATOM   2813  HC  MOL    24     314.050 202.040 139.570  1.00  0.00            
ATOM   2814  HC  MOL    24     315.310 202.700 140.540  1.00  0.00            
ATOM   2815  CT  MOL    24     315.200 205.540 140.620  1.00  0.00            
ATOM   2816  OH  MOL    24     316.220 204.950 141.420  1.00  0.00            
ATOM   2817  HO  MOL    24     316.310 204.020 141.240  1.00  0.00            
ATOM   2818  CT  MOL    24     315.530 205.390 139.120  1.00  0.00            
ATOM   2819  HC  MOL    24     315.600 204.370 138.800  1.00  0.00            
ATOM   2820  HC  MOL    24     316.450 205.860 138.870  1.00  0.00            
ATOM   2821  HC  MOL    24     314.740 205.830 138.510  1.00  0.00            
ATOM   2822  HC  MOL    24     315.200 206.560 140.840  1.00  0.00            
ATOM   2823  HC  MOL    24     313.500 207.690 141.110  1.00  0.00            
ATOM   2824  CT  MOL    24     309.920 211.610 142.120  1.00  0.00            
ATOM   2825  CT  MOL    24     309.670 211.990 143.580  1.00  0.00            
ATOM   2826  HC  MOL    24     310.590 211.920 144.140  1.00  0.00            
ATOM   2827  HC  MOL    24     308.940 211.340 144.070  1.00  0.00            
ATOM   2828  HC  MOL    24     309.270 212.990 143.660  1.00  0.00            
ATOM   2829  HC  MOL    24     310.720 212.210 141.730  1.00  0.00            
ATOM   2830  HC  MOL    24     309.070 211.850 141.520  1.00  0.00            
ATOM   2831  HC  MOL    24     307.580 210.020 142.550  1.00  0.00            
ATOM   2832  CT  MOL    24     304.770 208.990 143.100  1.00  0.00            
ATOM   2833  CT  MOL    24     304.640 209.400 144.560  1.00  0.00            
ATOM   2834  HC  MOL    24     305.610 209.700 144.930  1.00  0.00            
ATOM   2835  HC  MOL    24     304.340 208.510 145.100  1.00  0.00            
ATOM   2836  HC  MOL    24     303.950 210.230 144.680  1.00  0.00            
ATOM   2837  HC  MOL    24     303.760 208.820 142.740  1.00  0.00            
ATOM   2838  HC  MOL    24     305.090 209.830 142.500  1.00  0.00            
ATOM   2839  O_2 MOL    24     303.120 205.650 143.710  1.00  0.00            
ATOM   2840  HC  MOL    24     304.220 203.480 142.390  1.00  0.00            
ATOM   2841  HC  MOL    24     304.750 203.370 144.040  1.00  0.00            
ATOM   2842  CT  MOL    24     309.380 200.280 143.320  1.00  0.00            
ATOM   2843  HC  MOL    24     310.360 199.900 143.070  1.00  0.00            
ATOM   2844  HC  MOL    24     309.390 200.860 144.230  1.00  0.00            
ATOM   2845  HC  MOL    24     308.750 199.380 143.470  1.00  0.00            
ATOM   2846  HC  MOL    24     308.720 200.500 141.290  1.00  0.00            
ATOM   2847  CT  MOL    24     312.840 210.420 141.290  1.00  0.00            
ATOM   2848  HC  MOL    24     313.040 211.150 142.060  1.00  0.00            
ATOM   2849  HC  MOL    24     313.750 209.850 141.120  1.00  0.00            
ATOM   2850  HC  MOL    24     312.640 211.010 140.400  1.00  0.00            
ATOM   2851  CT  MOL    24     311.580 201.030 141.100  1.00  0.00            
ATOM   2852  HC  MOL    24     312.170 201.060 140.180  1.00  0.00            
ATOM   2853  HC  MOL    24     310.870 200.210 140.950  1.00  0.00            
ATOM   2854  HC  MOL    24     312.270 200.700 141.860  1.00  0.00            
ATOM   2855  HC  MOL    24     307.080 201.410 143.640  1.00  0.00            
ATOM   2856  CT  MOL    24     306.150 201.030 141.710  1.00  0.00            
ATOM   2857  CT  MOL    24     305.780 199.530 141.940  1.00  0.00            
ATOM   2858  HC  MOL    24     306.340 201.220 140.670  1.00  0.00            
ATOM   2859  HC  MOL    24     305.200 201.530 141.920  1.00  0.00            
ATOM   2860  HC  MOL    24     305.000 199.220 141.270  1.00  0.00            
ATOM   2861  HC  MOL    24     306.660 198.910 141.720  1.00  0.00            
ATOM   2862  C_2 MOL    24     305.330 199.230 143.340  1.00  0.00            
ATOM   2863  OS  MOL    24     306.310 198.620 144.030  1.00  0.00            
ATOM   2864  O_2 MOL    24     304.400 199.750 143.850  1.00  0.00            
ATOM   2865  CT  MOL    24     306.210 198.410 145.450  1.00  0.00            
ATOM   2866  CM  MOL    24     307.610 198.090 145.890  1.00  0.00            
ATOM   2867  CM  MOL    24     308.230 196.910 145.920  1.00  0.00            
ATOM   2868  CT  MOL    24     309.690 196.800 146.310  1.00  0.00            
ATOM   2869  HC  MOL    24     305.490 197.630 145.620  1.00  0.00            
ATOM   2870  HC  MOL    24     305.870 199.310 145.950  1.00  0.00            
ATOM   2871  HC  MOL    24     308.180 198.960 146.130  1.00  0.00            
ATOM   2872  HC  MOL    24     310.240 196.540 145.410  1.00  0.00            
ATOM   2873  HC  MOL    24     310.030 197.760 146.620  1.00  0.00            
ATOM   2874  CT  MOL    24     307.590 195.610 145.470  1.00  0.00            
ATOM   2875  HC  MOL    24     306.590 195.690 145.080  1.00  0.00            
ATOM   2876  HC  MOL    24     307.570 194.890 146.280  1.00  0.00            
ATOM   2877  HC  MOL    24     308.210 195.230 144.670  1.00  0.00            
ATOM   2878  CT  MOL    24     310.030 195.780 147.420  1.00  0.00            
ATOM   2879  CM  MOL    24     311.480 195.830 147.770  1.00  0.00            
ATOM   2880  CM  MOL    24     312.530 195.140 147.280  1.00  0.00            
ATOM   2881  CT  MOL    24     313.930 195.340 147.870  1.00  0.00            
ATOM   2882  HC  MOL    24     309.460 195.970 148.350  1.00  0.00            
ATOM   2883  HC  MOL    24     309.730 194.780 147.100  1.00  0.00            
ATOM   2884  HC  MOL    24     311.670 196.560 148.550  1.00  0.00            
ATOM   2885  HC  MOL    24     314.340 194.360 148.060  1.00  0.00            
ATOM   2886  HC  MOL    24     313.830 195.800 148.870  1.00  0.00            
ATOM   2887  CT  MOL    24     312.410 194.020 146.230  1.00  0.00            
ATOM   2888  HC  MOL    24     311.420 193.880 145.880  1.00  0.00            
ATOM   2889  HC  MOL    24     312.820 193.080 146.600  1.00  0.00            
ATOM   2890  HC  MOL    24     312.970 194.250 145.300  1.00  0.00            
ATOM   2891  CT  MOL    24     314.870 196.170 146.990  1.00  0.00            
ATOM   2892  CM  MOL    24     316.320 195.890 147.360  1.00  0.00            
ATOM   2893  CM  MOL    24     317.360 195.470 146.640  1.00  0.00            
ATOM   2894  CT  MOL    24     318.710 195.260 147.280  1.00  0.00            
ATOM   2895  HC  MOL    24     314.710 195.930 145.980  1.00  0.00            
ATOM   2896  HC  MOL    24     314.680 197.240 147.110  1.00  0.00            
ATOM   2897  HC  MOL    24     316.480 195.980 148.410  1.00  0.00            
ATOM   2898  HC  MOL    24     319.090 194.260 147.100  1.00  0.00            
ATOM   2899  HC  MOL    24     318.650 195.310 148.350  1.00  0.00            
ATOM   2900  HC  MOL    24     319.480 195.950 146.970  1.00  0.00            
ATOM   2901  CT  MOL    24     317.350 195.180 145.180  1.00  0.00            
ATOM   2902  HC  MOL    24     317.890 195.920 144.640  1.00  0.00            
ATOM   2903  HC  MOL    24     316.330 195.160 144.780  1.00  0.00            
ATOM   2904  HC  MOL    24     317.800 194.210 144.970  1.00  0.00            
ATOM   2905  CS  MOL    25     335.420 204.550 146.850  1.00  0.00            
ATOM   2906  CW  MOL    25     333.880 204.930 146.980  1.00  0.00            
ATOM   2907  NA  MOL    25     333.210 203.730 147.480  1.00  0.00            
ATOM   2908  CW  MOL    25     334.180 202.620 147.620  1.00  0.00            
ATOM   2909  CS  MOL    25     335.580 203.180 147.270  1.00  0.00            
ATOM   2910  CM  MOL    25     333.930 201.310 147.860  1.00  0.00            
ATOM   2911  CW  MOL    25     332.660 200.680 148.140  1.00  0.00            
ATOM   2912  CS  MOL    25     332.510 199.180 148.430  1.00  0.00            
ATOM   2913  CS  MOL    25     331.090 198.930 148.700  1.00  0.00            
ATOM   2914  CW  MOL    25     330.350 200.280 148.630  1.00  0.00            
ATOM   2915  NA  MOL    25     331.390 201.310 148.210  1.00  0.00            
ATOM   2916  CM  MOL    25     329.050 200.520 148.920  1.00  0.00            
ATOM   2917  CW  MOL    25     328.470 201.800 148.870  1.00  0.00            
ATOM   2918  CS  MOL    25     327.070 202.210 149.180  1.00  0.00            
ATOM   2919  CS  MOL    25     327.020 203.720 149.050  1.00  0.00            
ATOM   2920  CW  MOL    25     328.430 204.160 148.650  1.00  0.00            
ATOM   2921  NA  MOL    25     329.300 203.040 148.540  1.00  0.00            
ATOM   2922  CM  MOL    25     328.530 205.630 148.360  1.00  0.00            
ATOM   2923  CT  MOL    25     327.070 206.220 148.730  1.00  0.00            
ATOM   2924  C_2 MOL    25     326.070 204.940 149.150  1.00  0.00            
ATOM   2925  CW  MOL    25     329.610 206.220 147.890  1.00  0.00            
ATOM   2926  NA  MOL    25     330.910 205.530 147.590  1.00  0.00            
ATOM   2927  CW  MOL    25     331.870 206.420 147.040  1.00  0.00            
ATOM   2928  CT  MOL    25     331.190 207.860 146.770  1.00  0.00            
ATOM   2929  CT  MOL    25     329.720 207.780 147.490  1.00  0.00            
ATOM   2930  CM  MOL    25     333.280 206.180 146.780  1.00  0.00            
ATOM   2931  MG  MOL    25     331.200 203.350 147.710  1.00  0.00            
ATOM   2932  CT  MOL    25     336.570 205.360 146.260  1.00  0.00            
ATOM   2933  HC  MOL    25     336.280 205.840 145.340  1.00  0.00            
ATOM   2934  HC  MOL    25     336.880 206.120 146.970  1.00  0.00            
ATOM   2935  HC  MOL    25     337.410 204.740 146.070  1.00  0.00            
ATOM   2936  CT  MOL    25     336.870 202.360 147.450  1.00  0.00            
ATOM   2937  OH  MOL    25     337.950 203.130 147.950  1.00  0.00            
ATOM   2938  HO  MOL    25     338.700 202.530 148.020  1.00  0.00            
ATOM   2939  CT  MOL    25     337.290 201.610 146.170  1.00  0.00            
ATOM   2940  HC  MOL    25     337.430 202.320 145.360  1.00  0.00            
ATOM   2941  HC  MOL    25     336.510 200.950 145.770  1.00  0.00            
ATOM   2942  HC  MOL    25     338.210 201.050 146.270  1.00  0.00            
ATOM   2943  HC  MOL    25     336.690 201.590 148.200  1.00  0.00            
ATOM   2944  HC  MOL    25     334.770 200.640 147.850  1.00  0.00            
ATOM   2945  CT  MOL    25     330.470 197.580 149.080  1.00  0.00            
ATOM   2946  CT  MOL    25     330.250 197.430 150.590  1.00  0.00            
ATOM   2947  HC  MOL    25     331.140 197.420 151.160  1.00  0.00            
ATOM   2948  HC  MOL    25     329.700 196.510 150.790  1.00  0.00            
ATOM   2949  HC  MOL    25     329.680 198.240 151.010  1.00  0.00            
ATOM   2950  HC  MOL    25     331.070 196.760 148.710  1.00  0.00            
ATOM   2951  HC  MOL    25     329.540 197.520 148.560  1.00  0.00            
ATOM   2952  HC  MOL    25     328.430 199.700 149.180  1.00  0.00            
ATOM   2953  CT  MOL    25     325.860 201.340 149.370  1.00  0.00            
ATOM   2954  CT  MOL    25     325.200 201.510 150.740  1.00  0.00            
ATOM   2955  HC  MOL    25     325.830 201.040 151.480  1.00  0.00            
ATOM   2956  HC  MOL    25     324.220 201.040 150.810  1.00  0.00            
ATOM   2957  HC  MOL    25     325.040 202.570 150.990  1.00  0.00            
ATOM   2958  HC  MOL    25     326.090 200.310 149.200  1.00  0.00            
ATOM   2959  HC  MOL    25     325.150 201.620 148.620  1.00  0.00            
ATOM   2960  O_2 MOL    25     324.920 205.040 149.450  1.00  0.00            
ATOM   2961  HC  MOL    25     327.000 206.910 149.570  1.00  0.00            
ATOM   2962  HC  MOL    25     326.620 206.750 147.910  1.00  0.00            
ATOM   2963  CT  MOL    25     331.070 208.180 145.260  1.00  0.00            
ATOM   2964  HC  MOL    25     332.020 208.260 144.730  1.00  0.00            
ATOM   2965  HC  MOL    25     330.500 207.450 144.700  1.00  0.00            
ATOM   2966  HC  MOL    25     330.580 209.130 145.130  1.00  0.00            
ATOM   2967  HC  MOL    25     331.820 208.630 147.240  1.00  0.00            
ATOM   2968  CT  MOL    25     333.570 198.150 148.320  1.00  0.00            
ATOM   2969  HC  MOL    25     333.500 197.590 147.420  1.00  0.00            
ATOM   2970  HC  MOL    25     334.570 198.560 148.330  1.00  0.00            
ATOM   2971  HC  MOL    25     333.460 197.470 149.130  1.00  0.00            
ATOM   2972  CT  MOL    25     334.110 207.360 146.280  1.00  0.00            
ATOM   2973  HC  MOL    25     334.250 207.310 145.210  1.00  0.00            
ATOM   2974  HC  MOL    25     335.060 207.420 146.790  1.00  0.00            
ATOM   2975  HC  MOL    25     333.710 208.340 146.390  1.00  0.00            
ATOM   2976  HC  MOL    25     328.890 207.970 146.820  1.00  0.00            
ATOM   2977  CT  MOL    25     329.590 208.710 148.730  1.00  0.00            
ATOM   2978  CT  MOL    25     328.880 210.060 148.460  1.00  0.00            
ATOM   2979  HC  MOL    25     330.560 208.820 149.240  1.00  0.00            
ATOM   2980  HC  MOL    25     328.930 208.210 149.430  1.00  0.00            
ATOM   2981  HC  MOL    25     327.880 209.870 148.090  1.00  0.00            
ATOM   2982  HC  MOL    25     328.800 210.570 149.430  1.00  0.00            
ATOM   2983  C_2 MOL    25     329.560 211.070 147.520  1.00  0.00            
ATOM   2984  OS  MOL    25     328.720 211.870 146.870  1.00  0.00            
ATOM   2985  O_2 MOL    25     330.750 211.090 147.350  1.00  0.00            
ATOM   2986  CT  MOL    25     329.220 212.790 145.880  1.00  0.00            
ATOM   2987  CM  MOL    25     327.990 213.490 145.310  1.00  0.00            
ATOM   2988  CM  MOL    25     327.430 213.370 144.110  1.00  0.00            
ATOM   2989  CT  MOL    25     326.110 214.040 143.710  1.00  0.00            
ATOM   2990  HC  MOL    25     329.820 212.220 145.190  1.00  0.00            
ATOM   2991  HC  MOL    25     329.880 213.470 146.410  1.00  0.00            
ATOM   2992  HC  MOL    25     327.570 214.140 146.080  1.00  0.00            
ATOM   2993  HC  MOL    25     326.230 214.620 142.780  1.00  0.00            
ATOM   2994  HC  MOL    25     325.370 213.300 143.510  1.00  0.00            
ATOM   2995  CT  MOL    25     327.980 212.470 143.000  1.00  0.00            
ATOM   2996  HC  MOL    25     328.920 212.000 143.220  1.00  0.00            
ATOM   2997  HC  MOL    25     328.120 213.030 142.090  1.00  0.00            
ATOM   2998  HC  MOL    25     327.220 211.730 142.760  1.00  0.00            
ATOM   2999  CT  MOL    25     325.460 215.080 144.710  1.00  0.00            
ATOM   3000  CM  MOL    25     324.090 215.570 144.250  1.00  0.00            
ATOM   3001  CM  MOL    25     322.930 215.560 144.890  1.00  0.00            
ATOM   3002  CT  MOL    25     321.630 216.040 144.220  1.00  0.00            
ATOM   3003  HC  MOL    25     325.380 214.590 145.690  1.00  0.00            
ATOM   3004  HC  MOL    25     326.140 215.910 144.810  1.00  0.00            
ATOM   3005  HC  MOL    25     324.150 215.910 143.230  1.00  0.00            
ATOM   3006  HC  MOL    25     321.790 216.290 143.200  1.00  0.00            
ATOM   3007  HC  MOL    25     321.250 216.930 144.740  1.00  0.00            
ATOM   3008  CT  MOL    25     322.750 215.130 146.350  1.00  0.00            
ATOM   3009  HC  MOL    25     323.650 214.870 146.890  1.00  0.00            
ATOM   3010  HC  MOL    25     322.090 214.290 146.390  1.00  0.00            
ATOM   3011  HC  MOL    25     322.330 215.940 146.920  1.00  0.00            
ATOM   3012  CT  MOL    25     320.500 214.970 144.270  1.00  0.00            
ATOM   3013  CM  MOL    25     319.370 215.240 143.300  1.00  0.00            
ATOM   3014  CM  MOL    25     318.080 215.500 143.470  1.00  0.00            
ATOM   3015  CT  MOL    25     317.220 215.770 142.270  1.00  0.00            
ATOM   3016  HC  MOL    25     320.970 214.030 144.000  1.00  0.00            
ATOM   3017  HC  MOL    25     320.150 214.860 145.280  1.00  0.00            
ATOM   3018  HC  MOL    25     319.760 215.310 142.300  1.00  0.00            
ATOM   3019  HC  MOL    25     316.310 215.160 142.340  1.00  0.00            
ATOM   3020  HC  MOL    25     317.710 215.620 141.320  1.00  0.00            
ATOM   3021  HC  MOL    25     316.840 216.790 142.280  1.00  0.00            
ATOM   3022  CT  MOL    25     317.340 215.580 144.820  1.00  0.00            
ATOM   3023  HC  MOL    25     317.940 215.310 145.660  1.00  0.00            
ATOM   3024  HC  MOL    25     316.430 214.960 144.870  1.00  0.00            
ATOM   3025  HC  MOL    25     317.000 216.600 144.980  1.00  0.00            
ATOM   3026  CS  MOL    26     327.480 202.110 145.320  1.00  0.00            
ATOM   3027  CW  MOL    26     325.930 202.350 145.620  1.00  0.00            
ATOM   3028  NA  MOL    26     325.710 203.770 145.590  1.00  0.00            
ATOM   3029  CW  MOL    26     326.980 204.500 145.250  1.00  0.00            
ATOM   3030  CS  MOL    26     328.110 203.410 145.150  1.00  0.00            
ATOM   3031  CM  MOL    26     327.160 205.840 145.050  1.00  0.00            
ATOM   3032  CW  MOL    26     326.220 206.890 145.140  1.00  0.00            
ATOM   3033  CS  MOL    26     326.550 208.370 144.900  1.00  0.00            
ATOM   3034  CS  MOL    26     325.320 209.120 145.210  1.00  0.00            
ATOM   3035  CW  MOL    26     324.230 208.120 145.600  1.00  0.00            
ATOM   3036  NA  MOL    26     324.850 206.730 145.530  1.00  0.00            
ATOM   3037  CM  MOL    26     322.940 208.400 145.920  1.00  0.00            
ATOM   3038  CW  MOL    26     321.960 207.460 146.250  1.00  0.00            
ATOM   3039  CS  MOL    26     320.530 207.650 146.610  1.00  0.00            
ATOM   3040  CS  MOL    26     319.920 206.270 146.760  1.00  0.00            
ATOM   3041  CW  MOL    26     321.070 205.290 146.500  1.00  0.00            
ATOM   3042  NA  MOL    26     322.280 205.990 146.200  1.00  0.00            
ATOM   3043  CM  MOL    26     320.620 203.850 146.600  1.00  0.00            
ATOM   3044  CT  MOL    26     319.030 203.920 146.980  1.00  0.00            
ATOM   3045  C_2 MOL    26     318.620 205.510 147.120  1.00  0.00            
ATOM   3046  CW  MOL    26     321.450 202.810 146.490  1.00  0.00            
ATOM   3047  NA  MOL    26     322.930 202.930 146.170  1.00  0.00            
ATOM   3048  CW  MOL    26     323.580 201.680 146.220  1.00  0.00            
ATOM   3049  CT  MOL    26     322.510 200.530 146.690  1.00  0.00            
ATOM   3050  CT  MOL    26     321.100 201.280 146.750  1.00  0.00            
ATOM   3051  CM  MOL    26     324.960 201.360 145.920  1.00  0.00            
ATOM   3052  MG  MOL    26     323.940 204.820 145.650  1.00  0.00            
ATOM   3053  CT  MOL    26     328.240 200.810 145.220  1.00  0.00            
ATOM   3054  HC  MOL    26     328.470 200.400 146.190  1.00  0.00            
ATOM   3055  HC  MOL    26     327.670 200.090 144.630  1.00  0.00            
ATOM   3056  HC  MOL    26     329.130 200.990 144.630  1.00  0.00            
ATOM   3057  CT  MOL    26     329.590 203.730 144.970  1.00  0.00            
ATOM   3058  OH  MOL    26     330.410 202.910 145.790  1.00  0.00            
ATOM   3059  HO  MOL    26     330.100 202.010 145.760  1.00  0.00            
ATOM   3060  CT  MOL    26     330.000 203.580 143.510  1.00  0.00            
ATOM   3061  HC  MOL    26     329.800 202.590 143.100  1.00  0.00            
ATOM   3062  HC  MOL    26     331.080 203.790 143.430  1.00  0.00            
ATOM   3063  HC  MOL    26     329.440 204.290 142.910  1.00  0.00            
ATOM   3064  HC  MOL    26     329.720 204.750 145.290  1.00  0.00            
ATOM   3065  HC  MOL    26     328.150 206.120 144.800  1.00  0.00            
ATOM   3066  CT  MOL    26     325.120 210.620 145.140  1.00  0.00            
ATOM   3067  CT  MOL    26     325.150 211.270 146.540  1.00  0.00            
ATOM   3068  HC  MOL    26     326.060 211.080 147.080  1.00  0.00            
ATOM   3069  HC  MOL    26     324.260 210.980 147.130  1.00  0.00            
ATOM   3070  HC  MOL    26     325.040 212.350 146.420  1.00  0.00            
ATOM   3071  HC  MOL    26     325.910 211.040 144.490  1.00  0.00            
ATOM   3072  HC  MOL    26     324.190 210.870 144.580  1.00  0.00            
ATOM   3073  HC  MOL    26     322.660 209.420 145.940  1.00  0.00            
ATOM   3074  CT  MOL    26     319.760 208.950 146.760  1.00  0.00            
ATOM   3075  CT  MOL    26     319.700 209.400 148.210  1.00  0.00            
ATOM   3076  HC  MOL    26     320.660 209.610 148.650  1.00  0.00            
ATOM   3077  HC  MOL    26     319.250 208.600 148.800  1.00  0.00            
ATOM   3078  HC  MOL    26     319.110 210.310 148.310  1.00  0.00            
ATOM   3079  HC  MOL    26     318.760 208.810 146.350  1.00  0.00            
ATOM   3080  HC  MOL    26     320.250 209.710 146.170  1.00  0.00            
ATOM   3081  O_2 MOL    26     317.520 205.910 147.390  1.00  0.00            
ATOM   3082  HC  MOL    26     318.410 203.450 146.240  1.00  0.00            
ATOM   3083  HC  MOL    26     318.800 203.430 147.940  1.00  0.00            
ATOM   3084  CT  MOL    26     322.860 199.990 148.110  1.00  0.00            
ATOM   3085  HC  MOL    26     323.810 199.450 148.230  1.00  0.00            
ATOM   3086  HC  MOL    26     322.930 200.810 148.810  1.00  0.00            
ATOM   3087  HC  MOL    26     322.090 199.330 148.470  1.00  0.00            
ATOM   3088  HC  MOL    26     322.520 199.710 145.990  1.00  0.00            
ATOM   3089  CT  MOL    26     327.840 208.900 144.350  1.00  0.00            
ATOM   3090  HC  MOL    26     328.390 209.480 145.080  1.00  0.00            
ATOM   3091  HC  MOL    26     328.500 208.100 144.050  1.00  0.00            
ATOM   3092  HC  MOL    26     327.690 209.540 143.490  1.00  0.00            
ATOM   3093  CT  MOL    26     325.350 199.870 145.970  1.00  0.00            
ATOM   3094  HC  MOL    26     325.680 199.500 144.990  1.00  0.00            
ATOM   3095  HC  MOL    26     324.630 199.130 146.290  1.00  0.00            
ATOM   3096  HC  MOL    26     326.160 199.650 146.630  1.00  0.00            
ATOM   3097  HC  MOL    26     320.610 201.140 147.700  1.00  0.00            
ATOM   3098  CT  MOL    26     320.090 200.730 145.700  1.00  0.00            
ATOM   3099  CT  MOL    26     319.570 199.310 145.950  1.00  0.00            
ATOM   3100  HC  MOL    26     320.570 200.820 144.750  1.00  0.00            
ATOM   3101  HC  MOL    26     319.200 201.320 145.640  1.00  0.00            
ATOM   3102  HC  MOL    26     319.000 199.000 145.070  1.00  0.00            
ATOM   3103  HC  MOL    26     320.400 198.610 146.020  1.00  0.00            
ATOM   3104  C_2 MOL    26     318.610 199.210 147.140  1.00  0.00            
ATOM   3105  OS  MOL    26     319.130 198.500 148.150  1.00  0.00            
ATOM   3106  O_2 MOL    26     317.610 199.860 147.250  1.00  0.00            
ATOM   3107  CT  MOL    26     318.440 198.410 149.390  1.00  0.00            
ATOM   3108  CM  MOL    26     319.310 197.640 150.360  1.00  0.00            
ATOM   3109  CM  MOL    26     318.970 196.760 151.280  1.00  0.00            
ATOM   3110  CT  MOL    26     320.040 196.250 152.220  1.00  0.00            
ATOM   3111  HC  MOL    26     317.440 197.990 149.220  1.00  0.00            
ATOM   3112  HC  MOL    26     318.260 199.460 149.700  1.00  0.00            
ATOM   3113  HC  MOL    26     320.370 197.890 150.270  1.00  0.00            
ATOM   3114  HC  MOL    26     319.980 195.150 152.290  1.00  0.00            
ATOM   3115  HC  MOL    26     321.010 196.410 151.740  1.00  0.00            
ATOM   3116  CT  MOL    26     317.580 196.250 151.550  1.00  0.00            
ATOM   3117  HC  MOL    26     316.790 196.630 150.910  1.00  0.00            
ATOM   3118  HC  MOL    26     317.260 196.460 152.560  1.00  0.00            
ATOM   3119  HC  MOL    26     317.550 195.190 151.450  1.00  0.00            
ATOM   3120  CT  MOL    26     319.970 196.860 153.630  1.00  0.00            
ATOM   3121  CM  MOL    26     321.240 196.550 154.420  1.00  0.00            
ATOM   3122  CM  MOL    26     321.390 196.120 155.670  1.00  0.00            
ATOM   3123  CT  MOL    26     322.790 195.820 156.190  1.00  0.00            
ATOM   3124  HC  MOL    26     319.950 197.930 153.490  1.00  0.00            
ATOM   3125  HC  MOL    26     319.040 196.610 154.110  1.00  0.00            
ATOM   3126  HC  MOL    26     322.130 196.640 153.820  1.00  0.00            
ATOM   3127  HC  MOL    26     322.950 196.310 157.130  1.00  0.00            
ATOM   3128  HC  MOL    26     323.480 196.300 155.510  1.00  0.00            
ATOM   3129  CT  MOL    26     320.310 195.930 156.710  1.00  0.00            
ATOM   3130  HC  MOL    26     319.430 196.470 156.480  1.00  0.00            
ATOM   3131  HC  MOL    26     320.650 196.230 157.700  1.00  0.00            
ATOM   3132  HC  MOL    26     320.060 194.880 156.810  1.00  0.00            
ATOM   3133  CT  MOL    26     323.110 194.320 156.350  1.00  0.00            
ATOM   3134  CM  MOL    26     324.570 194.070 156.630  1.00  0.00            
ATOM   3135  CM  MOL    26     325.180 193.580 157.690  1.00  0.00            
ATOM   3136  CT  MOL    26     326.690 193.330 157.710  1.00  0.00            
ATOM   3137  HC  MOL    26     322.490 193.880 157.140  1.00  0.00            
ATOM   3138  HC  MOL    26     322.840 193.820 155.440  1.00  0.00            
ATOM   3139  HC  MOL    26     325.180 194.280 155.760  1.00  0.00            
ATOM   3140  HC  MOL    26     327.130 193.880 158.530  1.00  0.00            
ATOM   3141  HC  MOL    26     327.220 193.630 156.800  1.00  0.00            
ATOM   3142  HC  MOL    26     326.900 192.270 157.870  1.00  0.00            
ATOM   3143  CT  MOL    26     324.530 193.110 159.020  1.00  0.00            
ATOM   3144  HC  MOL    26     324.630 192.070 159.260  1.00  0.00            
ATOM   3145  HC  MOL    26     323.430 193.310 159.090  1.00  0.00            
ATOM   3146  HC  MOL    26     324.990 193.610 159.860  1.00  0.00            
ATOM   3147  CS  MOL    27     348.670 208.550 150.540  1.00  0.00            
ATOM   3148  CW  MOL    27     347.140 208.250 150.900  1.00  0.00            
ATOM   3149  NA  MOL    27     347.020 206.830 151.220  1.00  0.00            
ATOM   3150  CW  MOL    27     348.360 206.190 151.100  1.00  0.00            
ATOM   3151  CS  MOL    27     349.390 207.310 150.740  1.00  0.00            
ATOM   3152  CM  MOL    27     348.630 204.850 151.140  1.00  0.00            
ATOM   3153  CW  MOL    27     347.740 203.790 151.430  1.00  0.00            
ATOM   3154  CS  MOL    27     348.130 202.290 151.390  1.00  0.00            
ATOM   3155  CS  MOL    27     346.990 201.540 151.900  1.00  0.00            
ATOM   3156  CW  MOL    27     345.870 202.540 152.250  1.00  0.00            
ATOM   3157  NA  MOL    27     346.380 203.910 151.850  1.00  0.00            
ATOM   3158  CM  MOL    27     344.640 202.230 152.740  1.00  0.00            
ATOM   3159  CW  MOL    27     343.600 203.150 152.950  1.00  0.00            
ATOM   3160  CS  MOL    27     342.190 202.950 153.380  1.00  0.00            
ATOM   3161  CS  MOL    27     341.520 204.310 153.290  1.00  0.00            
ATOM   3162  CW  MOL    27     342.610 205.280 152.810  1.00  0.00            
ATOM   3163  NA  MOL    27     343.860 204.620 152.630  1.00  0.00            
ATOM   3164  CM  MOL    27     342.070 206.660 152.580  1.00  0.00            
ATOM   3165  CT  MOL    27     340.480 206.570 153.000  1.00  0.00            
ATOM   3166  C_2 MOL    27     340.180 205.040 153.490  1.00  0.00            
ATOM   3167  CW  MOL    27     342.780 207.670 152.140  1.00  0.00            
ATOM   3168  NA  MOL    27     344.230 207.610 151.740  1.00  0.00            
ATOM   3169  CW  MOL    27     344.710 208.830 151.240  1.00  0.00            
ATOM   3170  CT  MOL    27     343.490 209.920 151.190  1.00  0.00            
ATOM   3171  CT  MOL    27     342.230 209.140 151.800  1.00  0.00            
ATOM   3172  CM  MOL    27     346.060 209.170 150.890  1.00  0.00            
ATOM   3173  MG  MOL    27     345.310 205.730 151.600  1.00  0.00            
ATOM   3174  CT  MOL    27     349.270 209.830 150.000  1.00  0.00            
ATOM   3175  HC  MOL    27     348.630 210.200 149.210  1.00  0.00            
ATOM   3176  HC  MOL    27     349.470 210.540 150.770  1.00  0.00            
ATOM   3177  HC  MOL    27     350.240 209.610 149.560  1.00  0.00            
ATOM   3178  CT  MOL    27     350.870 207.060 150.530  1.00  0.00            
ATOM   3179  OH  MOL    27     351.620 208.110 151.100  1.00  0.00            
ATOM   3180  HO  MOL    27     352.530 207.930 150.890  1.00  0.00            
ATOM   3181  CT  MOL    27     351.250 206.840 149.060  1.00  0.00            
ATOM   3182  HC  MOL    27     350.830 207.630 148.410  1.00  0.00            
ATOM   3183  HC  MOL    27     350.850 205.860 148.690  1.00  0.00            
ATOM   3184  HC  MOL    27     352.320 206.780 148.960  1.00  0.00            
ATOM   3185  HC  MOL    27     351.170 206.190 151.100  1.00  0.00            
ATOM   3186  HC  MOL    27     349.650 204.560 150.900  1.00  0.00            
ATOM   3187  CT  MOL    27     346.870 200.030 152.020  1.00  0.00            
ATOM   3188  CT  MOL    27     347.070 199.540 153.470  1.00  0.00            
ATOM   3189  HC  MOL    27     348.050 199.790 153.830  1.00  0.00            
ATOM   3190  HC  MOL    27     346.960 198.470 153.510  1.00  0.00            
ATOM   3191  HC  MOL    27     346.340 199.980 154.160  1.00  0.00            
ATOM   3192  HC  MOL    27     347.590 199.510 151.400  1.00  0.00            
ATOM   3193  HC  MOL    27     345.920 199.680 151.580  1.00  0.00            
ATOM   3194  HC  MOL    27     344.450 201.190 152.920  1.00  0.00            
ATOM   3195  CT  MOL    27     341.520 201.690 153.790  1.00  0.00            
ATOM   3196  CT  MOL    27     340.990 201.700 155.210  1.00  0.00            
ATOM   3197  HC  MOL    27     341.820 201.760 155.900  1.00  0.00            
ATOM   3198  HC  MOL    27     340.450 200.760 155.450  1.00  0.00            
ATOM   3199  HC  MOL    27     340.330 202.530 155.400  1.00  0.00            
ATOM   3200  HC  MOL    27     342.160 200.820 153.650  1.00  0.00            
ATOM   3201  HC  MOL    27     340.650 201.530 153.210  1.00  0.00            
ATOM   3202  O_2 MOL    27     339.120 204.600 153.830  1.00  0.00            
ATOM   3203  HC  MOL    27     340.220 207.170 153.870  1.00  0.00            
ATOM   3204  HC  MOL    27     339.790 206.810 152.180  1.00  0.00            
ATOM   3205  CT  MOL    27     343.170 210.300 149.720  1.00  0.00            
ATOM   3206  HC  MOL    27     343.930 210.900 149.250  1.00  0.00            
ATOM   3207  HC  MOL    27     343.050 209.400 149.130  1.00  0.00            
ATOM   3208  HC  MOL    27     342.250 210.870 149.710  1.00  0.00            
ATOM   3209  HC  MOL    27     343.710 210.780 151.800  1.00  0.00            
ATOM   3210  CT  MOL    27     349.430 201.710 150.870  1.00  0.00            
ATOM   3211  HC  MOL    27     350.260 202.390 150.950  1.00  0.00            
ATOM   3212  HC  MOL    27     349.680 200.810 151.420  1.00  0.00            
ATOM   3213  HC  MOL    27     349.380 201.480 149.810  1.00  0.00            
ATOM   3214  CT  MOL    27     346.330 210.670 150.580  1.00  0.00            
ATOM   3215  HC  MOL    27     346.440 210.820 149.510  1.00  0.00            
ATOM   3216  HC  MOL    27     347.210 211.060 151.120  1.00  0.00            
ATOM   3217  HC  MOL    27     345.570 211.360 150.890  1.00  0.00            
ATOM   3218  HC  MOL    27     341.470 209.010 151.050  1.00  0.00            
ATOM   3219  CT  MOL    27     341.550 209.860 153.020  1.00  0.00            
ATOM   3220  CT  MOL    27     340.340 210.730 152.620  1.00  0.00            
ATOM   3221  HC  MOL    27     342.250 210.390 153.660  1.00  0.00            
ATOM   3222  HC  MOL    27     341.080 209.100 153.630  1.00  0.00            
ATOM   3223  HC  MOL    27     339.620 210.190 152.000  1.00  0.00            
ATOM   3224  HC  MOL    27     339.820 210.980 153.500  1.00  0.00            
ATOM   3225  C_2 MOL    27     340.680 212.020 151.910  1.00  0.00            
ATOM   3226  OS  MOL    27     339.660 212.540 151.240  1.00  0.00            
ATOM   3227  O_2 MOL    27     341.790 212.440 151.880  1.00  0.00            
ATOM   3228  CT  MOL    27     339.880 213.660 150.390  1.00  0.00            
ATOM   3229  CM  MOL    27     338.570 213.840 149.650  1.00  0.00            
ATOM   3230  CM  MOL    27     338.330 213.660 148.350  1.00  0.00            
ATOM   3231  CT  MOL    27     336.920 213.910 147.800  1.00  0.00            
ATOM   3232  HC  MOL    27     340.750 213.540 149.770  1.00  0.00            
ATOM   3233  HC  MOL    27     340.120 214.550 150.970  1.00  0.00            
ATOM   3234  HC  MOL    27     337.770 214.190 150.290  1.00  0.00            
ATOM   3235  HC  MOL    27     336.610 213.070 147.170  1.00  0.00            
ATOM   3236  HC  MOL    27     336.230 213.880 148.610  1.00  0.00            
ATOM   3237  CT  MOL    27     339.320 213.140 147.320  1.00  0.00            
ATOM   3238  HC  MOL    27     340.270 212.770 147.680  1.00  0.00            
ATOM   3239  HC  MOL    27     339.540 213.900 146.560  1.00  0.00            
ATOM   3240  HC  MOL    27     338.820 212.340 146.780  1.00  0.00            
ATOM   3241  CT  MOL    27     336.760 215.250 147.060  1.00  0.00            
ATOM   3242  CM  MOL    27     335.360 215.390 146.480  1.00  0.00            
ATOM   3243  CM  MOL    27     334.960 215.540 145.230  1.00  0.00            
ATOM   3244  CT  MOL    27     333.520 215.790 144.820  1.00  0.00            
ATOM   3245  HC  MOL    27     336.920 216.100 147.710  1.00  0.00            
ATOM   3246  HC  MOL    27     337.530 215.290 146.310  1.00  0.00            
ATOM   3247  HC  MOL    27     334.630 215.540 147.290  1.00  0.00            
ATOM   3248  HC  MOL    27     333.210 215.020 144.110  1.00  0.00            
ATOM   3249  HC  MOL    27     333.430 216.750 144.280  1.00  0.00            
ATOM   3250  CT  MOL    27     335.900 215.540 144.040  1.00  0.00            
ATOM   3251  HC  MOL    27     336.930 215.370 144.250  1.00  0.00            
ATOM   3252  HC  MOL    27     335.840 216.460 143.460  1.00  0.00            
ATOM   3253  HC  MOL    27     335.670 214.750 143.350  1.00  0.00            
ATOM   3254  CT  MOL    27     332.430 215.770 145.910  1.00  0.00            
ATOM   3255  CM  MOL    27     331.070 216.060 145.370  1.00  0.00            
ATOM   3256  CM  MOL    27     330.170 216.990 145.690  1.00  0.00            
ATOM   3257  CT  MOL    27     328.850 217.070 144.960  1.00  0.00            
ATOM   3258  HC  MOL    27     332.470 214.770 146.340  1.00  0.00            
ATOM   3259  HC  MOL    27     332.710 216.430 146.720  1.00  0.00            
ATOM   3260  HC  MOL    27     330.780 215.400 144.550  1.00  0.00            
ATOM   3261  HC  MOL    27     328.030 216.930 145.630  1.00  0.00            
ATOM   3262  HC  MOL    27     328.760 216.350 144.150  1.00  0.00            
ATOM   3263  HC  MOL    27     328.710 218.060 144.480  1.00  0.00            
ATOM   3264  CT  MOL    27     330.280 218.010 146.780  1.00  0.00            
ATOM   3265  HC  MOL    27     331.120 217.870 147.460  1.00  0.00            
ATOM   3266  HC  MOL    27     329.380 217.970 147.370  1.00  0.00            
ATOM   3267  HC  MOL    27     330.360 219.020 146.350  1.00  0.00            
ATOM   3268  CS  MOL    28     342.390 203.130 149.620  1.00  0.00            
ATOM   3269  CW  MOL    28     340.880 202.770 150.010  1.00  0.00            
ATOM   3270  NA  MOL    28     340.140 204.020 149.900  1.00  0.00            
ATOM   3271  CW  MOL    28     341.030 205.140 149.470  1.00  0.00            
ATOM   3272  CS  MOL    28     342.460 204.540 149.350  1.00  0.00            
ATOM   3273  CM  MOL    28     340.680 206.410 149.150  1.00  0.00            
ATOM   3274  CW  MOL    28     339.410 207.020 149.140  1.00  0.00            
ATOM   3275  CS  MOL    28     339.100 208.500 148.750  1.00  0.00            
ATOM   3276  CS  MOL    28     337.670 208.710 148.950  1.00  0.00            
ATOM   3277  CW  MOL    28     337.060 207.380 149.400  1.00  0.00            
ATOM   3278  NA  MOL    28     338.180 206.350 149.480  1.00  0.00            
ATOM   3279  CM  MOL    28     335.750 207.180 149.650  1.00  0.00            
ATOM   3280  CW  MOL    28     335.210 205.990 150.100  1.00  0.00            
ATOM   3281  CS  MOL    28     333.790 205.670 150.490  1.00  0.00            
ATOM   3282  CS  MOL    28     333.780 204.220 150.940  1.00  0.00            
ATOM   3283  CW  MOL    28     335.240 203.750 150.830  1.00  0.00            
ATOM   3284  NA  MOL    28     336.100 204.770 150.320  1.00  0.00            
ATOM   3285  CM  MOL    28     335.400 202.310 151.240  1.00  0.00            
ATOM   3286  CT  MOL    28     333.920 201.830 151.750  1.00  0.00            
ATOM   3287  C_2 MOL    28     332.900 203.130 151.520  1.00  0.00            
ATOM   3288  CW  MOL    28     336.590 201.650 151.190  1.00  0.00            
ATOM   3289  NA  MOL    28     337.900 202.250 150.780  1.00  0.00            
ATOM   3290  CW  MOL    28     338.960 201.330 150.840  1.00  0.00            
ATOM   3291  CT  MOL    28     338.390 199.870 151.320  1.00  0.00            
ATOM   3292  CT  MOL    28     336.810 200.120 151.550  1.00  0.00            
ATOM   3293  CM  MOL    28     340.320 201.530 150.430  1.00  0.00            
ATOM   3294  MG  MOL    28     338.090 204.290 149.940  1.00  0.00            
ATOM   3295  CT  MOL    28     343.590 202.200 149.460  1.00  0.00            
ATOM   3296  HC  MOL    28     343.680 201.550 150.300  1.00  0.00            
ATOM   3297  HC  MOL    28     343.450 201.620 148.550  1.00  0.00            
ATOM   3298  HC  MOL    28     344.500 202.740 149.360  1.00  0.00            
ATOM   3299  CT  MOL    28     343.640 205.420 148.920  1.00  0.00            
ATOM   3300  OH  MOL    28     344.840 205.170 149.600  1.00  0.00            
ATOM   3301  HO  MOL    28     345.320 204.410 149.240  1.00  0.00            
ATOM   3302  CT  MOL    28     343.830 205.430 147.420  1.00  0.00            
ATOM   3303  HC  MOL    28     344.110 204.420 147.080  1.00  0.00            
ATOM   3304  HC  MOL    28     344.580 206.160 147.140  1.00  0.00            
ATOM   3305  HC  MOL    28     342.890 205.730 146.950  1.00  0.00            
ATOM   3306  HC  MOL    28     343.410 206.430 149.230  1.00  0.00            
ATOM   3307  HC  MOL    28     341.480 207.050 148.810  1.00  0.00            
ATOM   3308  CT  MOL    28     336.900 210.000 148.840  1.00  0.00            
ATOM   3309  CT  MOL    28     336.580 210.650 150.180  1.00  0.00            
ATOM   3310  HC  MOL    28     337.480 210.830 150.770  1.00  0.00            
ATOM   3311  HC  MOL    28     335.920 209.950 150.700  1.00  0.00            
ATOM   3312  HC  MOL    28     336.050 211.570 150.090  1.00  0.00            
ATOM   3313  HC  MOL    28     337.420 210.700 148.220  1.00  0.00            
ATOM   3314  HC  MOL    28     335.960 209.830 148.300  1.00  0.00            
ATOM   3315  HC  MOL    28     335.060 207.990 149.540  1.00  0.00            
ATOM   3316  CT  MOL    28     332.600 206.600 150.490  1.00  0.00            
ATOM   3317  CT  MOL    28     332.520 207.440 151.760  1.00  0.00            
ATOM   3318  HC  MOL    28     333.380 208.060 151.840  1.00  0.00            
ATOM   3319  HC  MOL    28     332.450 206.830 152.680  1.00  0.00            
ATOM   3320  HC  MOL    28     331.700 208.120 151.770  1.00  0.00            
ATOM   3321  HC  MOL    28     331.690 206.010 150.440  1.00  0.00            
ATOM   3322  HC  MOL    28     332.630 207.230 149.620  1.00  0.00            
ATOM   3323  O_2 MOL    28     331.720 203.100 151.760  1.00  0.00            
ATOM   3324  HC  MOL    28     333.490 200.980 151.200  1.00  0.00            
ATOM   3325  HC  MOL    28     333.880 201.550 152.820  1.00  0.00            
ATOM   3326  CT  MOL    28     338.980 199.400 152.680  1.00  0.00            
ATOM   3327  HC  MOL    28     340.060 199.200 152.680  1.00  0.00            
ATOM   3328  HC  MOL    28     338.760 200.100 153.480  1.00  0.00            
ATOM   3329  HC  MOL    28     338.530 198.440 152.960  1.00  0.00            
ATOM   3330  HC  MOL    28     338.560 199.090 150.610  1.00  0.00            
ATOM   3331  CT  MOL    28     340.120 209.520 148.320  1.00  0.00            
ATOM   3332  HC  MOL    28     340.150 210.320 149.060  1.00  0.00            
ATOM   3333  HC  MOL    28     341.110 209.090 148.210  1.00  0.00            
ATOM   3334  HC  MOL    28     339.820 209.930 147.360  1.00  0.00            
ATOM   3335  CT  MOL    28     341.230 200.290 150.420  1.00  0.00            
ATOM   3336  HC  MOL    28     341.850 200.220 149.580  1.00  0.00            
ATOM   3337  HC  MOL    28     340.740 199.340 150.460  1.00  0.00            
ATOM   3338  HC  MOL    28     341.890 200.340 151.260  1.00  0.00            
ATOM   3339  HC  MOL    28     336.570 199.990 152.600  1.00  0.00            
ATOM   3340  CT  MOL    28     335.900 199.150 150.750  1.00  0.00            
ATOM   3341  CT  MOL    28     335.930 197.700 151.230  1.00  0.00            
ATOM   3342  HC  MOL    28     336.200 199.170 149.700  1.00  0.00            
ATOM   3343  HC  MOL    28     334.870 199.480 150.780  1.00  0.00            
ATOM   3344  HC  MOL    28     335.350 197.140 150.530  1.00  0.00            
ATOM   3345  HC  MOL    28     336.940 197.310 151.200  1.00  0.00            
ATOM   3346  C_2 MOL    28     335.340 197.430 152.620  1.00  0.00            
ATOM   3347  OS  MOL    28     336.290 197.010 153.490  1.00  0.00            
ATOM   3348  O_2 MOL    28     334.300 197.900 152.980  1.00  0.00            
ATOM   3349  CT  MOL    28     336.020 196.960 154.900  1.00  0.00            
ATOM   3350  CM  MOL    28     337.270 196.510 155.590  1.00  0.00            
ATOM   3351  CM  MOL    28     337.550 195.380 156.210  1.00  0.00            
ATOM   3352  CT  MOL    28     338.880 195.090 156.880  1.00  0.00            
ATOM   3353  HC  MOL    28     335.150 196.340 155.040  1.00  0.00            
ATOM   3354  HC  MOL    28     335.720 197.960 155.190  1.00  0.00            
ATOM   3355  HC  MOL    28     338.020 197.300 155.520  1.00  0.00            
ATOM   3356  HC  MOL    28     338.700 194.790 157.910  1.00  0.00            
ATOM   3357  HC  MOL    28     339.360 194.250 156.420  1.00  0.00            
ATOM   3358  CT  MOL    28     336.560 194.230 156.370  1.00  0.00            
ATOM   3359  HC  MOL    28     335.670 194.280 155.750  1.00  0.00            
ATOM   3360  HC  MOL    28     336.230 194.190 157.390  1.00  0.00            
ATOM   3361  HC  MOL    28     337.050 193.280 156.190  1.00  0.00            
ATOM   3362  CT  MOL    28     339.890 196.260 156.970  1.00  0.00            
ATOM   3363  CM  MOL    28     341.090 195.830 157.790  1.00  0.00            
ATOM   3364  CM  MOL    28     341.470 196.140 159.020  1.00  0.00            
ATOM   3365  CT  MOL    28     342.730 195.540 159.610  1.00  0.00            
ATOM   3366  HC  MOL    28     340.270 196.510 155.960  1.00  0.00            
ATOM   3367  HC  MOL    28     339.440 197.130 157.420  1.00  0.00            
ATOM   3368  HC  MOL    28     341.730 195.150 157.230  1.00  0.00            
ATOM   3369  HC  MOL    28     343.360 196.330 160.030  1.00  0.00            
ATOM   3370  HC  MOL    28     343.370 195.060 158.860  1.00  0.00            
ATOM   3371  CT  MOL    28     340.790 197.150 159.920  1.00  0.00            
ATOM   3372  HC  MOL    28     339.820 197.530 159.600  1.00  0.00            
ATOM   3373  HC  MOL    28     341.460 198.010 160.030  1.00  0.00            
ATOM   3374  HC  MOL    28     340.630 196.780 160.910  1.00  0.00            
ATOM   3375  CT  MOL    28     342.440 194.510 160.710  1.00  0.00            
ATOM   3376  CM  MOL    28     343.650 194.200 161.550  1.00  0.00            
ATOM   3377  CM  MOL    28     344.070 194.810 162.660  1.00  0.00            
ATOM   3378  CT  MOL    28     345.360 194.380 163.320  1.00  0.00            
ATOM   3379  HC  MOL    28     341.650 194.860 161.370  1.00  0.00            
ATOM   3380  HC  MOL    28     342.040 193.620 160.230  1.00  0.00            
ATOM   3381  HC  MOL    28     344.220 193.370 161.140  1.00  0.00            
ATOM   3382  HC  MOL    28     346.080 195.180 163.360  1.00  0.00            
ATOM   3383  HC  MOL    28     345.830 193.570 162.830  1.00  0.00            
ATOM   3384  HC  MOL    28     345.270 194.110 164.370  1.00  0.00            
ATOM   3385  CT  MOL    28     343.410 195.950 163.390  1.00  0.00            
ATOM   3386  HC  MOL    28     342.450 196.280 163.020  1.00  0.00            
ATOM   3387  HC  MOL    28     344.040 196.830 163.330  1.00  0.00            
ATOM   3388  HC  MOL    28     343.290 195.670 164.450  1.00  0.00            
ATOM   3389  CS  MOL    29     361.890 214.220 153.380  1.00  0.00            
ATOM   3390  CW  MOL    29     360.340 213.910 153.640  1.00  0.00            
ATOM   3391  NA  MOL    29     360.270 212.510 154.080  1.00  0.00            
ATOM   3392  CW  MOL    29     361.620 211.910 154.070  1.00  0.00            
ATOM   3393  CS  MOL    29     362.640 213.030 153.710  1.00  0.00            
ATOM   3394  CM  MOL    29     361.940 210.610 154.240  1.00  0.00            
ATOM   3395  CW  MOL    29     361.100 209.490 154.600  1.00  0.00            
ATOM   3396  CS  MOL    29     361.560 208.020 154.740  1.00  0.00            
ATOM   3397  CS  MOL    29     360.460 207.290 155.380  1.00  0.00            
ATOM   3398  CW  MOL    29     359.280 208.270 155.540  1.00  0.00            
ATOM   3399  NA  MOL    29     359.740 209.620 155.010  1.00  0.00            
ATOM   3400  CM  MOL    29     358.060 208.010 156.060  1.00  0.00            
ATOM   3401  CW  MOL    29     357.000 208.930 156.160  1.00  0.00            
ATOM   3402  CS  MOL    29     355.630 208.750 156.710  1.00  0.00            
ATOM   3403  CS  MOL    29     354.900 210.050 156.480  1.00  0.00            
ATOM   3404  CW  MOL    29     355.920 211.010 155.860  1.00  0.00            
ATOM   3405  NA  MOL    29     357.170 210.350 155.680  1.00  0.00            
ATOM   3406  CM  MOL    29     355.340 212.340 155.480  1.00  0.00            
ATOM   3407  CT  MOL    29     353.770 212.270 155.950  1.00  0.00            
ATOM   3408  C_2 MOL    29     353.510 210.770 156.620  1.00  0.00            
ATOM   3409  CW  MOL    29     356.030 213.310 154.870  1.00  0.00            
ATOM   3410  NA  MOL    29     357.480 213.260 154.470  1.00  0.00            
ATOM   3411  CW  MOL    29     357.890 214.430 153.830  1.00  0.00            
ATOM   3412  CT  MOL    29     356.630 215.450 153.640  1.00  0.00            
ATOM   3413  CT  MOL    29     355.410 214.720 154.480  1.00  0.00            
ATOM   3414  CM  MOL    29     359.250 214.790 153.470  1.00  0.00            
ATOM   3415  MG  MOL    29     358.640 211.390 154.640  1.00  0.00            
ATOM   3416  CT  MOL    29     362.520 215.480 152.850  1.00  0.00            
ATOM   3417  HC  MOL    29     361.980 215.870 152.000  1.00  0.00            
ATOM   3418  HC  MOL    29     362.610 216.230 153.620  1.00  0.00            
ATOM   3419  HC  MOL    29     363.490 215.200 152.470  1.00  0.00            
ATOM   3420  CT  MOL    29     364.150 212.780 153.790  1.00  0.00            
ATOM   3421  OH  MOL    29     364.860 213.910 154.210  1.00  0.00            
ATOM   3422  HO  MOL    29     364.720 214.640 153.610  1.00  0.00            
ATOM   3423  CT  MOL    29     364.720 212.250 152.460  1.00  0.00            
ATOM   3424  HC  MOL    29     364.640 213.000 151.660  1.00  0.00            
ATOM   3425  HC  MOL    29     364.160 211.350 152.140  1.00  0.00            
ATOM   3426  HC  MOL    29     365.760 211.980 152.620  1.00  0.00            
ATOM   3427  HC  MOL    29     364.310 212.070 154.610  1.00  0.00            
ATOM   3428  HC  MOL    29     362.950 210.310 154.110  1.00  0.00            
ATOM   3429  CT  MOL    29     360.400 205.830 155.700  1.00  0.00            
ATOM   3430  CT  MOL    29     360.620 205.540 157.220  1.00  0.00            
ATOM   3431  HC  MOL    29     361.640 205.800 157.520  1.00  0.00            
ATOM   3432  HC  MOL    29     360.520 204.480 157.420  1.00  0.00            
ATOM   3433  HC  MOL    29     359.940 206.070 157.860  1.00  0.00            
ATOM   3434  HC  MOL    29     361.150 205.300 155.120  1.00  0.00            
ATOM   3435  HC  MOL    29     359.470 205.400 155.370  1.00  0.00            
ATOM   3436  HC  MOL    29     357.840 207.020 156.430  1.00  0.00            
ATOM   3437  CT  MOL    29     355.140 207.480 157.400  1.00  0.00            
ATOM   3438  CT  MOL    29     353.680 207.540 157.900  1.00  0.00            
ATOM   3439  HC  MOL    29     353.520 208.340 158.630  1.00  0.00            
ATOM   3440  HC  MOL    29     353.430 206.610 158.390  1.00  0.00            
ATOM   3441  HC  MOL    29     352.980 207.760 157.100  1.00  0.00            
ATOM   3442  HC  MOL    29     355.750 207.220 158.250  1.00  0.00            
ATOM   3443  HC  MOL    29     355.270 206.650 156.710  1.00  0.00            
ATOM   3444  O_2 MOL    29     352.490 210.440 157.170  1.00  0.00            
ATOM   3445  HC  MOL    29     353.520 212.980 156.720  1.00  0.00            
ATOM   3446  HC  MOL    29     353.050 212.420 155.150  1.00  0.00            
ATOM   3447  CT  MOL    29     356.250 215.550 152.130  1.00  0.00            
ATOM   3448  HC  MOL    29     356.980 215.970 151.470  1.00  0.00            
ATOM   3449  HC  MOL    29     355.980 214.550 151.770  1.00  0.00            
ATOM   3450  HC  MOL    29     355.370 216.140 152.040  1.00  0.00            
ATOM   3451  HC  MOL    29     356.900 216.420 154.010  1.00  0.00            
ATOM   3452  CT  MOL    29     362.880 207.470 154.250  1.00  0.00            
ATOM   3453  HC  MOL    29     363.660 208.220 154.270  1.00  0.00            
ATOM   3454  HC  MOL    29     363.250 206.650 154.830  1.00  0.00            
ATOM   3455  HC  MOL    29     362.820 207.160 153.220  1.00  0.00            
ATOM   3456  CT  MOL    29     359.510 216.220 152.990  1.00  0.00            
ATOM   3457  HC  MOL    29     359.820 216.260 151.970  1.00  0.00            
ATOM   3458  HC  MOL    29     360.230 216.710 153.650  1.00  0.00            
ATOM   3459  HC  MOL    29     358.660 216.870 153.020  1.00  0.00            
ATOM   3460  HC  MOL    29     354.500 214.560 153.870  1.00  0.00            
ATOM   3461  CT  MOL    29     355.010 215.540 155.740  1.00  0.00            
ATOM   3462  CT  MOL    29     353.570 216.190 155.670  1.00  0.00            
ATOM   3463  HC  MOL    29     355.730 216.330 155.950  1.00  0.00            
ATOM   3464  HC  MOL    29     355.020 214.920 156.630  1.00  0.00            
ATOM   3465  HC  MOL    29     352.820 215.450 155.490  1.00  0.00            
ATOM   3466  HC  MOL    29     353.340 216.700 156.640  1.00  0.00            
ATOM   3467  C_2 MOL    29     353.360 217.290 154.650  1.00  0.00            
ATOM   3468  OS  MOL    29     352.060 217.590 154.460  1.00  0.00            
ATOM   3469  O_2 MOL    29     354.270 217.820 154.070  1.00  0.00            
ATOM   3470  CT  MOL    29     351.680 218.560 153.480  1.00  0.00            
ATOM   3471  CM  MOL    29     350.190 218.690 153.620  1.00  0.00            
ATOM   3472  CM  MOL    29     349.250 218.580 152.680  1.00  0.00            
ATOM   3473  CT  MOL    29     347.790 218.780 153.070  1.00  0.00            
ATOM   3474  HC  MOL    29     352.030 218.290 152.520  1.00  0.00            
ATOM   3475  HC  MOL    29     352.150 219.470 153.780  1.00  0.00            
ATOM   3476  HC  MOL    29     349.910 218.950 154.600  1.00  0.00            
ATOM   3477  HC  MOL    29     347.200 217.880 152.860  1.00  0.00            
ATOM   3478  HC  MOL    29     347.720 218.960 154.130  1.00  0.00            
ATOM   3479  CT  MOL    29     349.530 218.200 151.210  1.00  0.00            
ATOM   3480  HC  MOL    29     350.550 217.960 150.990  1.00  0.00            
ATOM   3481  HC  MOL    29     349.260 218.970 150.530  1.00  0.00            
ATOM   3482  HC  MOL    29     348.930 217.320 150.950  1.00  0.00            
ATOM   3483  CT  MOL    29     347.020 219.930 152.360  1.00  0.00            
ATOM   3484  CM  MOL    29     345.780 220.300 153.150  1.00  0.00            
ATOM   3485  CM  MOL    29     344.480 220.170 152.880  1.00  0.00            
ATOM   3486  CT  MOL    29     343.370 220.670 153.820  1.00  0.00            
ATOM   3487  HC  MOL    29     347.680 220.810 152.290  1.00  0.00            
ATOM   3488  HC  MOL    29     346.800 219.680 151.340  1.00  0.00            
ATOM   3489  HC  MOL    29     346.050 220.790 154.110  1.00  0.00            
ATOM   3490  HC  MOL    29     342.710 219.830 154.000  1.00  0.00            
ATOM   3491  HC  MOL    29     342.750 221.440 153.360  1.00  0.00            
ATOM   3492  CT  MOL    29     343.950 219.510 151.610  1.00  0.00            
ATOM   3493  HC  MOL    29     344.690 219.160 150.900  1.00  0.00            
ATOM   3494  HC  MOL    29     343.280 220.190 151.110  1.00  0.00            
ATOM   3495  HC  MOL    29     343.300 218.640 151.850  1.00  0.00            
ATOM   3496  CT  MOL    29     343.800 221.080 155.240  1.00  0.00            
ATOM   3497  CM  MOL    29     342.610 221.320 156.160  1.00  0.00            
ATOM   3498  CM  MOL    29     342.360 220.720 157.310  1.00  0.00            
ATOM   3499  CT  MOL    29     341.090 221.080 158.050  1.00  0.00            
ATOM   3500  HC  MOL    29     344.440 220.340 155.650  1.00  0.00            
ATOM   3501  HC  MOL    29     344.430 221.970 155.230  1.00  0.00            
ATOM   3502  HC  MOL    29     341.940 222.060 155.780  1.00  0.00            
ATOM   3503  HC  MOL    29     340.410 220.250 157.990  1.00  0.00            
ATOM   3504  HC  MOL    29     340.600 221.930 157.630  1.00  0.00            
ATOM   3505  HC  MOL    29     341.320 221.270 159.100  1.00  0.00            
ATOM   3506  CT  MOL    29     343.210 219.710 158.040  1.00  0.00            
ATOM   3507  HC  MOL    29     344.020 219.260 157.460  1.00  0.00            
ATOM   3508  HC  MOL    29     342.620 218.870 158.380  1.00  0.00            
ATOM   3509  HC  MOL    29     343.680 220.160 158.930  1.00  0.00            
ATOM   3510  CS  MOL    30     355.910 208.250 152.730  1.00  0.00            
ATOM   3511  CW  MOL    30     354.500 207.760 153.220  1.00  0.00            
ATOM   3512  NA  MOL    30     353.580 208.890 153.140  1.00  0.00            
ATOM   3513  CW  MOL    30     354.290 210.080 152.600  1.00  0.00            
ATOM   3514  CS  MOL    30     355.780 209.650 152.390  1.00  0.00            
ATOM   3515  CM  MOL    30     353.780 211.280 152.300  1.00  0.00            
ATOM   3516  CW  MOL    30     352.440 211.780 152.440  1.00  0.00            
ATOM   3517  CS  MOL    30     351.950 213.190 152.100  1.00  0.00            
ATOM   3518  CS  MOL    30     350.520 213.240 152.360  1.00  0.00            
ATOM   3519  CW  MOL    30     350.090 211.880 152.910  1.00  0.00            
ATOM   3520  NA  MOL    30     351.330 211.000 152.900  1.00  0.00            
ATOM   3521  CM  MOL    30     348.840 211.510 153.260  1.00  0.00            
ATOM   3522  CW  MOL    30     348.480 210.240 153.690  1.00  0.00            
ATOM   3523  CS  MOL    30     347.160 209.710 154.150  1.00  0.00            
ATOM   3524  CS  MOL    30     347.370 208.270 154.550  1.00  0.00            
ATOM   3525  CW  MOL    30     348.830 207.970 154.240  1.00  0.00            
ATOM   3526  NA  MOL    30     349.500 209.100 153.710  1.00  0.00            
ATOM   3527  CM  MOL    30     349.220 206.570 154.620  1.00  0.00            
ATOM   3528  CT  MOL    30     347.870 205.880 155.240  1.00  0.00            
ATOM   3529  C_2 MOL    30     346.670 207.020 155.150  1.00  0.00            
ATOM   3530  CW  MOL    30     350.460 206.080 154.500  1.00  0.00            
ATOM   3531  NA  MOL    30     351.660 206.850 154.050  1.00  0.00            
ATOM   3532  CW  MOL    30     352.850 206.080 154.120  1.00  0.00            
ATOM   3533  CT  MOL    30     352.500 204.600 154.700  1.00  0.00            
ATOM   3534  CT  MOL    30     350.890 204.600 154.910  1.00  0.00            
ATOM   3535  CM  MOL    30     354.160 206.490 153.670  1.00  0.00            
ATOM   3536  MG  MOL    30     351.510 208.890 153.200  1.00  0.00            
ATOM   3537  CT  MOL    30     357.180 207.460 152.510  1.00  0.00            
ATOM   3538  HC  MOL    30     357.560 207.050 153.420  1.00  0.00            
ATOM   3539  HC  MOL    30     357.070 206.660 151.810  1.00  0.00            
ATOM   3540  HC  MOL    30     357.950 208.060 152.070  1.00  0.00            
ATOM   3541  CT  MOL    30     356.810 210.640 151.850  1.00  0.00            
ATOM   3542  OH  MOL    30     357.950 210.560 152.690  1.00  0.00            
ATOM   3543  HO  MOL    30     358.130 209.650 152.850  1.00  0.00            
ATOM   3544  CT  MOL    30     357.150 210.420 150.380  1.00  0.00            
ATOM   3545  HC  MOL    30     357.580 209.450 150.180  1.00  0.00            
ATOM   3546  HC  MOL    30     357.860 211.160 150.030  1.00  0.00            
ATOM   3547  HC  MOL    30     356.240 210.510 149.780  1.00  0.00            
ATOM   3548  HC  MOL    30     356.410 211.640 151.990  1.00  0.00            
ATOM   3549  HC  MOL    30     354.430 212.040 151.950  1.00  0.00            
ATOM   3550  CT  MOL    30     349.590 214.420 152.190  1.00  0.00            
ATOM   3551  CT  MOL    30     349.270 215.100 153.510  1.00  0.00            
ATOM   3552  HC  MOL    30     350.170 215.530 153.950  1.00  0.00            
ATOM   3553  HC  MOL    30     348.810 214.410 154.190  1.00  0.00            
ATOM   3554  HC  MOL    30     348.620 215.960 153.390  1.00  0.00            
ATOM   3555  HC  MOL    30     349.990 215.130 151.490  1.00  0.00            
ATOM   3556  HC  MOL    30     348.640 214.090 151.750  1.00  0.00            
ATOM   3557  HC  MOL    30     348.080 212.250 153.210  1.00  0.00            
ATOM   3558  CT  MOL    30     345.820 210.420 154.260  1.00  0.00            
ATOM   3559  CT  MOL    30     345.660 211.210 155.580  1.00  0.00            
ATOM   3560  HC  MOL    30     346.410 211.990 155.710  1.00  0.00            
ATOM   3561  HC  MOL    30     345.780 210.530 156.420  1.00  0.00            
ATOM   3562  HC  MOL    30     344.670 211.650 155.620  1.00  0.00            
ATOM   3563  HC  MOL    30     345.070 209.680 154.190  1.00  0.00            
ATOM   3564  HC  MOL    30     345.680 211.090 153.430  1.00  0.00            
ATOM   3565  O_2 MOL    30     345.560 206.920 155.570  1.00  0.00            
ATOM   3566  HC  MOL    30     347.470 205.040 154.630  1.00  0.00            
ATOM   3567  HC  MOL    30     347.930 205.530 156.270  1.00  0.00            
ATOM   3568  CT  MOL    30     353.160 204.380 156.090  1.00  0.00            
ATOM   3569  HC  MOL    30     354.230 204.470 156.060  1.00  0.00            
ATOM   3570  HC  MOL    30     352.850 205.100 156.800  1.00  0.00            
ATOM   3571  HC  MOL    30     352.900 203.390 156.490  1.00  0.00            
ATOM   3572  HC  MOL    30     352.820 203.790 154.070  1.00  0.00            
ATOM   3573  CT  MOL    30     352.810 214.320 151.480  1.00  0.00            
ATOM   3574  HC  MOL    30     352.280 214.800 150.660  1.00  0.00            
ATOM   3575  HC  MOL    30     353.020 215.080 152.220  1.00  0.00            
ATOM   3576  HC  MOL    30     353.770 213.940 151.120  1.00  0.00            
ATOM   3577  CT  MOL    30     355.250 205.390 153.720  1.00  0.00            
ATOM   3578  HC  MOL    30     355.760 205.250 152.790  1.00  0.00            
ATOM   3579  HC  MOL    30     354.880 204.370 153.950  1.00  0.00            
ATOM   3580  HC  MOL    30     356.020 205.550 154.430  1.00  0.00            
ATOM   3581  HC  MOL    30     350.630 204.450 155.950  1.00  0.00            
ATOM   3582  CT  MOL    30     350.180 203.490 154.070  1.00  0.00            
ATOM   3583  CT  MOL    30     350.240 202.070 154.720  1.00  0.00            
ATOM   3584  HC  MOL    30     350.590 203.470 153.070  1.00  0.00            
ATOM   3585  HC  MOL    30     349.150 203.770 153.950  1.00  0.00            
ATOM   3586  HC  MOL    30     349.810 201.390 154.030  1.00  0.00            
ATOM   3587  HC  MOL    30     351.270 201.730 154.840  1.00  0.00            
ATOM   3588  C_2 MOL    30     349.500 201.860 156.040  1.00  0.00            
ATOM   3589  OS  MOL    30     348.180 201.890 155.940  1.00  0.00            
ATOM   3590  O_2 MOL    30     350.080 201.740 157.080  1.00  0.00            
ATOM   3591  CT  MOL    30     347.280 201.760 157.060  1.00  0.00            
ATOM   3592  CM  MOL    30     346.730 200.370 156.890  1.00  0.00            
ATOM   3593  CM  MOL    30     345.490 199.920 156.650  1.00  0.00            
ATOM   3594  CT  MOL    30     345.260 198.410 156.530  1.00  0.00            
ATOM   3595  HC  MOL    30     346.560 202.570 157.020  1.00  0.00            
ATOM   3596  HC  MOL    30     347.830 201.850 157.990  1.00  0.00            
ATOM   3597  HC  MOL    30     347.520 199.640 157.000  1.00  0.00            
ATOM   3598  HC  MOL    30     344.440 198.270 155.840  1.00  0.00            
ATOM   3599  HC  MOL    30     346.140 197.900 156.130  1.00  0.00            
ATOM   3600  CT  MOL    30     344.240 200.780 156.490  1.00  0.00            
ATOM   3601  HC  MOL    30     344.430 201.840 156.680  1.00  0.00            
ATOM   3602  HC  MOL    30     343.410 200.400 157.070  1.00  0.00            
ATOM   3603  HC  MOL    30     343.910 200.780 155.470  1.00  0.00            
ATOM   3604  CT  MOL    30     344.880 197.730 157.860  1.00  0.00            
ATOM   3605  CM  MOL    30     345.900 197.980 158.970  1.00  0.00            
ATOM   3606  CM  MOL    30     346.640 197.170 159.750  1.00  0.00            
ATOM   3607  CT  MOL    30     347.590 197.720 160.810  1.00  0.00            
ATOM   3608  HC  MOL    30     343.910 198.110 158.210  1.00  0.00            
ATOM   3609  HC  MOL    30     344.730 196.650 157.720  1.00  0.00            
ATOM   3610  HC  MOL    30     346.030 199.030 159.170  1.00  0.00            
ATOM   3611  HC  MOL    30     348.480 197.100 160.780  1.00  0.00            
ATOM   3612  HC  MOL    30     347.170 197.510 161.800  1.00  0.00            
ATOM   3613  CT  MOL    30     346.580 195.640 159.760  1.00  0.00            
ATOM   3614  HC  MOL    30     345.780 195.190 159.190  1.00  0.00            
ATOM   3615  HC  MOL    30     346.510 195.260 160.790  1.00  0.00            
ATOM   3616  HC  MOL    30     347.500 195.250 159.320  1.00  0.00            
ATOM   3617  CT  MOL    30     347.990 199.200 160.780  1.00  0.00            
ATOM   3618  CM  MOL    30     348.920 199.540 161.910  1.00  0.00            
ATOM   3619  CM  MOL    30     350.060 200.230 161.950  1.00  0.00            
ATOM   3620  CT  MOL    30     350.800 200.340 163.250  1.00  0.00            
ATOM   3621  HC  MOL    30     348.420 199.460 159.820  1.00  0.00            
ATOM   3622  HC  MOL    30     347.120 199.820 160.870  1.00  0.00            
ATOM   3623  HC  MOL    30     348.560 199.140 162.860  1.00  0.00            
ATOM   3624  HC  MOL    30     351.760 199.830 163.210  1.00  0.00            
ATOM   3625  HC  MOL    30     350.260 199.940 164.080  1.00  0.00            
ATOM   3626  HC  MOL    30     351.050 201.390 163.490  1.00  0.00            
ATOM   3627  CT  MOL    30     350.810 200.890 160.790  1.00  0.00            
ATOM   3628  HC  MOL    30     351.080 201.910 160.920  1.00  0.00            
ATOM   3629  HC  MOL    30     350.250 200.810 159.850  1.00  0.00            
ATOM   3630  HC  MOL    30     351.720 200.320 160.610  1.00  0.00            
ATOM   3631  CS  MOL    31     375.590 219.730 156.330  1.00  0.00            
ATOM   3632  CW  MOL    31     374.060 219.450 156.530  1.00  0.00            
ATOM   3633  NA  MOL    31     373.920 218.110 157.100  1.00  0.00            
ATOM   3634  CW  MOL    31     375.260 217.470 157.180  1.00  0.00            
ATOM   3635  CS  MOL    31     376.320 218.560 156.790  1.00  0.00            
ATOM   3636  CM  MOL    31     375.520 216.180 157.460  1.00  0.00            
ATOM   3637  CW  MOL    31     374.620 215.170 157.870  1.00  0.00            
ATOM   3638  CS  MOL    31     375.030 213.710 158.120  1.00  0.00            
ATOM   3639  CS  MOL    31     373.860 213.010 158.680  1.00  0.00            
ATOM   3640  CW  MOL    31     372.710 214.020 158.740  1.00  0.00            
ATOM   3641  NA  MOL    31     373.220 215.340 158.210  1.00  0.00            
ATOM   3642  CM  MOL    31     371.440 213.790 159.190  1.00  0.00            
ATOM   3643  CW  MOL    31     370.420 214.740 159.160  1.00  0.00            
ATOM   3644  CS  MOL    31     369.030 214.650 159.660  1.00  0.00            
ATOM   3645  CS  MOL    31     368.340 215.970 159.390  1.00  0.00            
ATOM   3646  CW  MOL    31     369.420 216.850 158.730  1.00  0.00            
ATOM   3647  NA  MOL    31     370.650 216.130 158.580  1.00  0.00            
ATOM   3648  CM  MOL    31     368.910 218.210 158.340  1.00  0.00            
ATOM   3649  CT  MOL    31     367.340 218.220 158.810  1.00  0.00            
ATOM   3650  C_2 MOL    31     367.010 216.750 159.480  1.00  0.00            
ATOM   3651  CW  MOL    31     369.650 219.150 157.720  1.00  0.00            
ATOM   3652  NA  MOL    31     371.070 218.950 157.300  1.00  0.00            
ATOM   3653  CW  MOL    31     371.590 220.050 156.600  1.00  0.00            
ATOM   3654  CT  MOL    31     370.390 221.120 156.300  1.00  0.00            
ATOM   3655  CT  MOL    31     369.130 220.560 157.180  1.00  0.00            
ATOM   3656  CM  MOL    31     372.980 220.300 156.260  1.00  0.00            
ATOM   3657  MG  MOL    31     372.180 217.100 157.560  1.00  0.00            
ATOM   3658  CT  MOL    31     376.250 220.940 155.700  1.00  0.00            
ATOM   3659  HC  MOL    31     375.870 221.120 154.700  1.00  0.00            
ATOM   3660  HC  MOL    31     376.080 221.850 156.200  1.00  0.00            
ATOM   3661  HC  MOL    31     377.310 220.790 155.630  1.00  0.00            
ATOM   3662  CT  MOL    31     377.830 218.330 156.790  1.00  0.00            
ATOM   3663  OH  MOL    31     378.480 219.410 157.450  1.00  0.00            
ATOM   3664  HO  MOL    31     379.420 219.300 157.400  1.00  0.00            
ATOM   3665  CT  MOL    31     378.410 218.060 155.410  1.00  0.00            
ATOM   3666  HC  MOL    31     378.290 218.940 154.790  1.00  0.00            
ATOM   3667  HC  MOL    31     377.890 217.230 154.920  1.00  0.00            
ATOM   3668  HC  MOL    31     379.460 217.780 155.490  1.00  0.00            
ATOM   3669  HC  MOL    31     378.080 217.430 157.410  1.00  0.00            
ATOM   3670  HC  MOL    31     376.510 215.830 157.380  1.00  0.00            
ATOM   3671  CT  MOL    31     373.750 211.540 159.030  1.00  0.00            
ATOM   3672  CT  MOL    31     374.040 211.270 160.510  1.00  0.00            
ATOM   3673  HC  MOL    31     375.010 211.600 160.770  1.00  0.00            
ATOM   3674  HC  MOL    31     373.960 210.200 160.670  1.00  0.00            
ATOM   3675  HC  MOL    31     373.310 211.790 161.120  1.00  0.00            
ATOM   3676  HC  MOL    31     374.380 211.000 158.370  1.00  0.00            
ATOM   3677  HC  MOL    31     372.760 211.140 158.780  1.00  0.00            
ATOM   3678  HC  MOL    31     371.230 212.820 159.580  1.00  0.00            
ATOM   3679  CT  MOL    31     368.420 213.420 160.300  1.00  0.00            
ATOM   3680  CT  MOL    31     366.980 213.620 160.750  1.00  0.00            
ATOM   3681  HC  MOL    31     366.990 214.460 161.420  1.00  0.00            
ATOM   3682  HC  MOL    31     366.560 212.770 161.290  1.00  0.00            
ATOM   3683  HC  MOL    31     366.370 213.880 159.890  1.00  0.00            
ATOM   3684  HC  MOL    31     369.010 213.130 161.180  1.00  0.00            
ATOM   3685  HC  MOL    31     368.500 212.580 159.600  1.00  0.00            
ATOM   3686  O_2 MOL    31     365.920 216.440 159.870  1.00  0.00            
ATOM   3687  HC  MOL    31     367.110 218.910 159.600  1.00  0.00            
ATOM   3688  HC  MOL    31     366.670 218.370 157.980  1.00  0.00            
ATOM   3689  CT  MOL    31     370.040 221.110 154.780  1.00  0.00            
ATOM   3690  HC  MOL    31     370.770 221.610 154.140  1.00  0.00            
ATOM   3691  HC  MOL    31     369.950 220.110 154.390  1.00  0.00            
ATOM   3692  HC  MOL    31     369.120 221.590 154.610  1.00  0.00            
ATOM   3693  HC  MOL    31     370.610 222.140 156.610  1.00  0.00            
ATOM   3694  CT  MOL    31     376.390 213.100 157.850  1.00  0.00            
ATOM   3695  HC  MOL    31     377.190 213.710 158.240  1.00  0.00            
ATOM   3696  HC  MOL    31     376.470 212.130 158.330  1.00  0.00            
ATOM   3697  HC  MOL    31     376.540 212.990 156.780  1.00  0.00            
ATOM   3698  CT  MOL    31     373.240 221.660 155.590  1.00  0.00            
ATOM   3699  HC  MOL    31     373.570 221.470 154.600  1.00  0.00            
ATOM   3700  HC  MOL    31     373.960 222.290 156.120  1.00  0.00            
ATOM   3701  HC  MOL    31     372.410 222.350 155.480  1.00  0.00            
ATOM   3702  HC  MOL    31     368.250 220.430 156.550  1.00  0.00            
ATOM   3703  CT  MOL    31     368.670 221.430 158.380  1.00  0.00            
ATOM   3704  CT  MOL    31     367.370 222.220 158.170  1.00  0.00            
ATOM   3705  HC  MOL    31     369.460 222.130 158.670  1.00  0.00            
ATOM   3706  HC  MOL    31     368.500 220.770 159.200  1.00  0.00            
ATOM   3707  HC  MOL    31     366.530 221.570 158.040  1.00  0.00            
ATOM   3708  HC  MOL    31     367.170 222.730 159.110  1.00  0.00            
ATOM   3709  C_2 MOL    31     367.370 223.270 157.090  1.00  0.00            
ATOM   3710  OS  MOL    31     366.190 223.320 156.430  1.00  0.00            
ATOM   3711  O_2 MOL    31     368.380 223.720 156.600  1.00  0.00            
ATOM   3712  CT  MOL    31     366.020 224.130 155.250  1.00  0.00            
ATOM   3713  CM  MOL    31     364.610 223.910 154.830  1.00  0.00            
ATOM   3714  CM  MOL    31     364.130 223.440 153.670  1.00  0.00            
ATOM   3715  CT  MOL    31     362.640 223.260 153.410  1.00  0.00            
ATOM   3716  HC  MOL    31     366.770 223.880 154.560  1.00  0.00            
ATOM   3717  HC  MOL    31     366.200 225.180 155.470  1.00  0.00            
ATOM   3718  HC  MOL    31     363.940 224.220 155.600  1.00  0.00            
ATOM   3719  HC  MOL    31     362.420 223.700 152.430  1.00  0.00            
ATOM   3720  HC  MOL    31     362.410 222.200 153.280  1.00  0.00            
ATOM   3721  CT  MOL    31     364.970 222.940 152.490  1.00  0.00            
ATOM   3722  HC  MOL    31     366.030 223.160 152.540  1.00  0.00            
ATOM   3723  HC  MOL    31     364.690 223.390 151.550  1.00  0.00            
ATOM   3724  HC  MOL    31     364.840 221.880 152.400  1.00  0.00            
ATOM   3725  CT  MOL    31     361.640 223.870 154.400  1.00  0.00            
ATOM   3726  CM  MOL    31     360.200 223.490 154.090  1.00  0.00            
ATOM   3727  CM  MOL    31     359.150 224.240 153.670  1.00  0.00            
ATOM   3728  CT  MOL    31     357.790 223.620 153.290  1.00  0.00            
ATOM   3729  HC  MOL    31     361.850 223.490 155.400  1.00  0.00            
ATOM   3730  HC  MOL    31     361.810 224.930 154.460  1.00  0.00            
ATOM   3731  HC  MOL    31     360.080 222.430 154.150  1.00  0.00            
ATOM   3732  HC  MOL    31     357.650 223.740 152.220  1.00  0.00            
ATOM   3733  HC  MOL    31     356.980 224.160 153.790  1.00  0.00            
ATOM   3734  CT  MOL    31     359.240 225.770 153.460  1.00  0.00            
ATOM   3735  HC  MOL    31     360.200 226.210 153.610  1.00  0.00            
ATOM   3736  HC  MOL    31     358.570 226.290 154.110  1.00  0.00            
ATOM   3737  HC  MOL    31     358.950 226.040 152.430  1.00  0.00            
ATOM   3738  CT  MOL    31     357.550 222.140 153.610  1.00  0.00            
ATOM   3739  CM  MOL    31     356.210 221.640 153.100  1.00  0.00            
ATOM   3740  CM  MOL    31     355.930 220.700 152.210  1.00  0.00            
ATOM   3741  CT  MOL    31     354.500 220.430 151.830  1.00  0.00            
ATOM   3742  HC  MOL    31     358.330 221.540 153.110  1.00  0.00            
ATOM   3743  HC  MOL    31     357.690 221.970 154.660  1.00  0.00            
ATOM   3744  HC  MOL    31     355.350 222.120 153.550  1.00  0.00            
ATOM   3745  HC  MOL    31     354.280 220.720 150.800  1.00  0.00            
ATOM   3746  HC  MOL    31     353.780 220.920 152.480  1.00  0.00            
ATOM   3747  HC  MOL    31     354.290 219.380 151.860  1.00  0.00            
ATOM   3748  CT  MOL    31     356.900 219.830 151.420  1.00  0.00            
ATOM   3749  HC  MOL    31     357.920 219.900 151.750  1.00  0.00            
ATOM   3750  HC  MOL    31     356.820 220.060 150.380  1.00  0.00            
ATOM   3751  HC  MOL    31     356.630 218.800 151.590  1.00  0.00            
ATOM   3752  CS  MOL    32     369.570 213.810 155.770  1.00  0.00            
ATOM   3753  CW  MOL    32     368.150 213.320 156.310  1.00  0.00            
ATOM   3754  NA  MOL    32     367.210 214.440 156.120  1.00  0.00            
ATOM   3755  CW  MOL    32     367.920 215.610 155.550  1.00  0.00            
ATOM   3756  CS  MOL    32     369.420 215.210 155.430  1.00  0.00            
ATOM   3757  CM  MOL    32     367.410 216.830 155.300  1.00  0.00            
ATOM   3758  CW  MOL    32     366.090 217.340 155.420  1.00  0.00            
ATOM   3759  CS  MOL    32     365.640 218.780 155.100  1.00  0.00            
ATOM   3760  CS  MOL    32     364.200 218.810 155.320  1.00  0.00            
ATOM   3761  CW  MOL    32     363.740 217.440 155.800  1.00  0.00            
ATOM   3762  NA  MOL    32     364.960 216.540 155.840  1.00  0.00            
ATOM   3763  CM  MOL    32     362.470 217.080 156.140  1.00  0.00            
ATOM   3764  CW  MOL    32     362.080 215.790 156.560  1.00  0.00            
ATOM   3765  CS  MOL    32     360.750 215.260 156.930  1.00  0.00            
ATOM   3766  CS  MOL    32     360.940 213.810 157.370  1.00  0.00            
ATOM   3767  CW  MOL    32     362.450 213.540 157.200  1.00  0.00            
ATOM   3768  NA  MOL    32     363.110 214.700 156.700  1.00  0.00            
ATOM   3769  CM  MOL    32     362.820 212.150 157.620  1.00  0.00            
ATOM   3770  CT  MOL    32     361.440 211.470 158.140  1.00  0.00            
ATOM   3771  C_2 MOL    32     360.210 212.550 157.890  1.00  0.00            
ATOM   3772  CW  MOL    32     364.090 211.700 157.620  1.00  0.00            
ATOM   3773  NA  MOL    32     365.310 212.460 157.210  1.00  0.00            
ATOM   3774  CW  MOL    32     366.500 211.710 157.320  1.00  0.00            
ATOM   3775  CT  MOL    32     366.150 210.280 158.010  1.00  0.00            
ATOM   3776  CT  MOL    32     364.520 210.260 158.110  1.00  0.00            
ATOM   3777  CM  MOL    32     367.810 212.070 156.890  1.00  0.00            
ATOM   3778  MG  MOL    32     365.150 214.470 156.290  1.00  0.00            
ATOM   3779  CT  MOL    32     370.830 213.020 155.610  1.00  0.00            
ATOM   3780  HC  MOL    32     371.310 212.830 156.540  1.00  0.00            
ATOM   3781  HC  MOL    32     370.640 212.080 155.100  1.00  0.00            
ATOM   3782  HC  MOL    32     371.550 213.500 154.970  1.00  0.00            
ATOM   3783  CT  MOL    32     370.520 216.150 154.930  1.00  0.00            
ATOM   3784  OH  MOL    32     371.680 216.090 155.730  1.00  0.00            
ATOM   3785  HO  MOL    32     371.810 215.170 155.900  1.00  0.00            
ATOM   3786  CT  MOL    32     370.890 215.930 153.460  1.00  0.00            
ATOM   3787  HC  MOL    32     371.210 214.950 153.260  1.00  0.00            
ATOM   3788  HC  MOL    32     371.690 216.650 153.240  1.00  0.00            
ATOM   3789  HC  MOL    32     370.040 216.170 152.810  1.00  0.00            
ATOM   3790  HC  MOL    32     370.160 217.150 155.050  1.00  0.00            
ATOM   3791  HC  MOL    32     368.090 217.610 154.950  1.00  0.00            
ATOM   3792  CT  MOL    32     363.310 220.020 155.200  1.00  0.00            
ATOM   3793  CT  MOL    32     363.120 220.780 156.510  1.00  0.00            
ATOM   3794  HC  MOL    32     364.020 221.280 156.870  1.00  0.00            
ATOM   3795  HC  MOL    32     362.800 220.100 157.320  1.00  0.00            
ATOM   3796  HC  MOL    32     362.350 221.530 156.390  1.00  0.00            
ATOM   3797  HC  MOL    32     363.740 220.700 154.470  1.00  0.00            
ATOM   3798  HC  MOL    32     362.320 219.740 154.820  1.00  0.00            
ATOM   3799  HC  MOL    32     361.690 217.820 156.040  1.00  0.00            
ATOM   3800  CT  MOL    32     359.450 216.010 156.890  1.00  0.00            
ATOM   3801  CT  MOL    32     358.950 216.570 158.240  1.00  0.00            
ATOM   3802  HC  MOL    32     359.570 217.360 158.610  1.00  0.00            
ATOM   3803  HC  MOL    32     358.930 215.810 159.020  1.00  0.00            
ATOM   3804  HC  MOL    32     357.940 216.970 158.120  1.00  0.00            
ATOM   3805  HC  MOL    32     358.670 215.340 156.570  1.00  0.00            
ATOM   3806  HC  MOL    32     359.540 216.820 156.190  1.00  0.00            
ATOM   3807  O_2 MOL    32     359.050 212.390 158.190  1.00  0.00            
ATOM   3808  HC  MOL    32     361.180 210.530 157.640  1.00  0.00            
ATOM   3809  HC  MOL    32     361.430 211.260 159.210  1.00  0.00            
ATOM   3810  CT  MOL    32     366.630 210.150 159.440  1.00  0.00            
ATOM   3811  HC  MOL    32     367.690 210.330 159.520  1.00  0.00            
ATOM   3812  HC  MOL    32     366.130 210.870 160.070  1.00  0.00            
ATOM   3813  HC  MOL    32     366.430 209.200 159.910  1.00  0.00            
ATOM   3814  HC  MOL    32     366.540 209.470 157.440  1.00  0.00            
ATOM   3815  CT  MOL    32     366.490 219.860 154.520  1.00  0.00            
ATOM   3816  HC  MOL    32     366.290 220.800 154.970  1.00  0.00            
ATOM   3817  HC  MOL    32     367.540 219.670 154.700  1.00  0.00            
ATOM   3818  HC  MOL    32     366.350 219.950 153.480  1.00  0.00            
ATOM   3819  CT  MOL    32     368.910 210.980 157.060  1.00  0.00            
ATOM   3820  HC  MOL    32     369.220 210.590 156.110  1.00  0.00            
ATOM   3821  HC  MOL    32     368.640 210.110 157.630  1.00  0.00            
ATOM   3822  HC  MOL    32     369.790 211.380 157.570  1.00  0.00            
ATOM   3823  HC  MOL    32     364.190 210.190 159.150  1.00  0.00            
ATOM   3824  CT  MOL    32     363.840 209.140 157.320  1.00  0.00            
ATOM   3825  CT  MOL    32     364.080 207.720 157.800  1.00  0.00            
ATOM   3826  HC  MOL    32     364.120 209.250 156.260  1.00  0.00            
ATOM   3827  HC  MOL    32     362.760 209.220 157.330  1.00  0.00            
ATOM   3828  HC  MOL    32     363.670 207.050 157.070  1.00  0.00            
ATOM   3829  HC  MOL    32     365.130 207.550 157.820  1.00  0.00            
ATOM   3830  C_2 MOL    32     363.540 207.410 159.200  1.00  0.00            
ATOM   3831  OS  MOL    32     364.480 207.280 160.120  1.00  0.00            
ATOM   3832  O_2 MOL    32     362.370 207.490 159.470  1.00  0.00            
ATOM   3833  CT  MOL    32     364.230 206.910 161.470  1.00  0.00            
ATOM   3834  CM  MOL    32     365.480 207.300 162.210  1.00  0.00            
ATOM   3835  CM  MOL    32     366.410 206.500 162.760  1.00  0.00            
ATOM   3836  CT  MOL    32     367.620 207.090 163.470  1.00  0.00            
ATOM   3837  HC  MOL    32     363.930 205.880 161.540  1.00  0.00            
ATOM   3838  HC  MOL    32     363.390 207.480 161.810  1.00  0.00            
ATOM   3839  HC  MOL    32     365.560 208.350 162.350  1.00  0.00            
ATOM   3840  HC  MOL    32     368.560 206.690 163.050  1.00  0.00            
ATOM   3841  HC  MOL    32     367.690 208.160 163.300  1.00  0.00            
ATOM   3842  CT  MOL    32     366.410 204.990 162.620  1.00  0.00            
ATOM   3843  HC  MOL    32     365.680 204.580 161.950  1.00  0.00            
ATOM   3844  HC  MOL    32     366.200 204.480 163.570  1.00  0.00            
ATOM   3845  HC  MOL    32     367.340 204.620 162.260  1.00  0.00            
ATOM   3846  CT  MOL    32     367.620 206.780 164.980  1.00  0.00            
ATOM   3847  CM  MOL    32     368.830 207.350 165.650  1.00  0.00            
ATOM   3848  CM  MOL    32     369.760 206.700 166.360  1.00  0.00            
ATOM   3849  CT  MOL    32     370.890 207.530 166.970  1.00  0.00            
ATOM   3850  HC  MOL    32     366.760 207.300 165.420  1.00  0.00            
ATOM   3851  HC  MOL    32     367.500 205.700 165.130  1.00  0.00            
ATOM   3852  HC  MOL    32     369.010 208.400 165.560  1.00  0.00            
ATOM   3853  HC  MOL    32     370.990 207.330 168.030  1.00  0.00            
ATOM   3854  HC  MOL    32     370.590 208.590 167.050  1.00  0.00            
ATOM   3855  CT  MOL    32     369.740 205.240 166.730  1.00  0.00            
ATOM   3856  HC  MOL    32     368.910 204.630 166.440  1.00  0.00            
ATOM   3857  HC  MOL    32     369.930 205.070 167.780  1.00  0.00            
ATOM   3858  HC  MOL    32     370.560 204.770 166.220  1.00  0.00            
ATOM   3859  CT  MOL    32     372.270 207.410 166.260  1.00  0.00            
ATOM   3860  CM  MOL    32     373.340 208.170 167.030  1.00  0.00            
ATOM   3861  CM  MOL    32     374.440 207.750 167.630  1.00  0.00            
ATOM   3862  CT  MOL    32     375.360 208.760 168.310  1.00  0.00            
ATOM   3863  HC  MOL    32     372.540 206.370 166.130  1.00  0.00            
ATOM   3864  HC  MOL    32     372.190 207.830 165.240  1.00  0.00            
ATOM   3865  HC  MOL    32     373.190 209.250 167.100  1.00  0.00            
ATOM   3866  HC  MOL    32     375.410 208.590 169.390  1.00  0.00            
ATOM   3867  HC  MOL    32     375.060 209.800 168.200  1.00  0.00            
ATOM   3868  HC  MOL    32     376.390 208.640 167.970  1.00  0.00            
ATOM   3869  CT  MOL    32     374.920 206.350 167.810  1.00  0.00            
ATOM   3870  HC  MOL    32     374.200 205.600 167.530  1.00  0.00            
ATOM   3871  HC  MOL    32     375.160 206.100 168.810  1.00  0.00            
ATOM   3872  HC  MOL    32     375.830 206.170 167.280  1.00  0.00            
ATOM   3873  CS  MOL    33     388.280 226.130 159.870  1.00  0.00            
ATOM   3874  CW  MOL    33     386.730 225.790 160.060  1.00  0.00            
ATOM   3875  NA  MOL    33     386.670 224.500 160.760  1.00  0.00            
ATOM   3876  CW  MOL    33     388.050 223.990 161.000  1.00  0.00            
ATOM   3877  CS  MOL    33     389.030 225.110 160.520  1.00  0.00            
ATOM   3878  CM  MOL    33     388.420 222.750 161.380  1.00  0.00            
ATOM   3879  CW  MOL    33     387.580 221.660 161.740  1.00  0.00            
ATOM   3880  CS  MOL    33     388.080 220.260 162.060  1.00  0.00            
ATOM   3881  CS  MOL    33     386.910 219.470 162.500  1.00  0.00            
ATOM   3882  CW  MOL    33     385.690 220.400 162.480  1.00  0.00            
ATOM   3883  NA  MOL    33     386.160 221.720 161.930  1.00  0.00            
ATOM   3884  CM  MOL    33     384.430 220.090 162.830  1.00  0.00            
ATOM   3885  CW  MOL    33     383.320 220.920 162.680  1.00  0.00            
ATOM   3886  CS  MOL    33     381.860 220.670 162.990  1.00  0.00            
ATOM   3887  CS  MOL    33     381.080 221.910 162.540  1.00  0.00            
ATOM   3888  CW  MOL    33     382.160 222.850 162.010  1.00  0.00            
ATOM   3889  NA  MOL    33     383.460 222.300 162.090  1.00  0.00            
ATOM   3890  CM  MOL    33     381.610 224.090 161.390  1.00  0.00            
ATOM   3891  CT  MOL    33     379.990 223.970 161.630  1.00  0.00            
ATOM   3892  C_2 MOL    33     379.670 222.500 162.380  1.00  0.00            
ATOM   3893  CW  MOL    33     382.300 225.040 160.740  1.00  0.00            
ATOM   3894  NA  MOL    33     383.800 225.040 160.580  1.00  0.00            
ATOM   3895  CW  MOL    33     384.260 226.140 159.830  1.00  0.00            
ATOM   3896  CT  MOL    33     382.990 227.030 159.280  1.00  0.00            
ATOM   3897  CT  MOL    33     381.700 226.290 159.950  1.00  0.00            
ATOM   3898  CM  MOL    33     385.630 226.520 159.600  1.00  0.00            
ATOM   3899  MG  MOL    33     385.040 223.310 161.150  1.00  0.00            
ATOM   3900  CT  MOL    33     388.930 227.290 159.100  1.00  0.00            
ATOM   3901  HC  MOL    33     388.470 227.420 158.130  1.00  0.00            
ATOM   3902  HC  MOL    33     388.850 228.240 159.630  1.00  0.00            
ATOM   3903  HC  MOL    33     389.950 227.030 158.870  1.00  0.00            
ATOM   3904  CT  MOL    33     390.530 224.940 160.700  1.00  0.00            
ATOM   3905  OH  MOL    33     391.160 226.140 161.150  1.00  0.00            
ATOM   3906  HO  MOL    33     391.180 226.810 160.440  1.00  0.00            
ATOM   3907  CT  MOL    33     391.240 224.400 159.490  1.00  0.00            
ATOM   3908  HC  MOL    33     391.110 225.060 158.650  1.00  0.00            
ATOM   3909  HC  MOL    33     390.870 223.420 159.280  1.00  0.00            
ATOM   3910  HC  MOL    33     392.300 224.280 159.640  1.00  0.00            
ATOM   3911  HC  MOL    33     390.720 224.260 161.510  1.00  0.00            
ATOM   3912  HC  MOL    33     389.460 222.550 161.380  1.00  0.00            
ATOM   3913  CT  MOL    33     386.890 218.010 162.880  1.00  0.00            
ATOM   3914  CT  MOL    33     386.840 217.830 164.400  1.00  0.00            
ATOM   3915  HC  MOL    33     387.710 218.240 164.890  1.00  0.00            
ATOM   3916  HC  MOL    33     386.780 216.780 164.670  1.00  0.00            
ATOM   3917  HC  MOL    33     385.950 218.330 164.770  1.00  0.00            
ATOM   3918  HC  MOL    33     387.740 217.530 162.420  1.00  0.00            
ATOM   3919  HC  MOL    33     386.000 217.480 162.490  1.00  0.00            
ATOM   3920  HC  MOL    33     384.220 219.110 163.220  1.00  0.00            
ATOM   3921  CT  MOL    33     381.240 219.410 163.570  1.00  0.00            
ATOM   3922  CT  MOL    33     380.580 219.710 164.920  1.00  0.00            
ATOM   3923  HC  MOL    33     381.300 219.920 165.690  1.00  0.00            
ATOM   3924  HC  MOL    33     380.000 218.850 165.230  1.00  0.00            
ATOM   3925  HC  MOL    33     379.900 220.550 164.880  1.00  0.00            
ATOM   3926  HC  MOL    33     381.990 218.650 163.680  1.00  0.00            
ATOM   3927  HC  MOL    33     380.480 219.070 162.890  1.00  0.00            
ATOM   3928  O_2 MOL    33     378.590 222.080 162.680  1.00  0.00            
ATOM   3929  HC  MOL    33     379.640 224.740 162.330  1.00  0.00            
ATOM   3930  HC  MOL    33     379.360 224.000 160.700  1.00  0.00            
ATOM   3931  CT  MOL    33     382.930 226.950 157.700  1.00  0.00            
ATOM   3932  HC  MOL    33     383.860 227.320 157.240  1.00  0.00            
ATOM   3933  HC  MOL    33     382.780 225.940 157.390  1.00  0.00            
ATOM   3934  HC  MOL    33     382.130 227.570 157.320  1.00  0.00            
ATOM   3935  HC  MOL    33     383.080 228.060 159.630  1.00  0.00            
ATOM   3936  CT  MOL    33     389.490 219.740 161.890  1.00  0.00            
ATOM   3937  HC  MOL    33     390.240 220.490 161.970  1.00  0.00            
ATOM   3938  HC  MOL    33     389.740 218.950 162.570  1.00  0.00            
ATOM   3939  HC  MOL    33     389.590 219.290 160.900  1.00  0.00            
ATOM   3940  CT  MOL    33     385.890 227.880 158.890  1.00  0.00            
ATOM   3941  HC  MOL    33     386.260 227.720 157.890  1.00  0.00            
ATOM   3942  HC  MOL    33     386.580 228.510 159.460  1.00  0.00            
ATOM   3943  HC  MOL    33     385.010 228.470 158.760  1.00  0.00            
ATOM   3944  HC  MOL    33     381.010 225.890 159.230  1.00  0.00            
ATOM   3945  CT  MOL    33     380.860 227.220 160.870  1.00  0.00            
ATOM   3946  CT  MOL    33     379.540 227.740 160.260  1.00  0.00            
ATOM   3947  HC  MOL    33     381.420 228.060 161.290  1.00  0.00            
ATOM   3948  HC  MOL    33     380.610 226.650 161.750  1.00  0.00            
ATOM   3949  HC  MOL    33     379.000 226.890 159.840  1.00  0.00            
ATOM   3950  HC  MOL    33     378.950 228.190 161.050  1.00  0.00            
ATOM   3951  C_2 MOL    33     379.670 228.810 159.170  1.00  0.00            
ATOM   3952  OS  MOL    33     378.500 228.940 158.560  1.00  0.00            
ATOM   3953  O_2 MOL    33     380.670 229.380 158.880  1.00  0.00            
ATOM   3954  CT  MOL    33     378.330 229.940 157.550  1.00  0.00            
ATOM   3955  CM  MOL    33     376.900 229.870 157.090  1.00  0.00            
ATOM   3956  CM  MOL    33     376.370 229.500 155.930  1.00  0.00            
ATOM   3957  CT  MOL    33     374.880 229.580 155.720  1.00  0.00            
ATOM   3958  HC  MOL    33     379.050 229.800 156.770  1.00  0.00            
ATOM   3959  HC  MOL    33     378.480 230.900 157.980  1.00  0.00            
ATOM   3960  HC  MOL    33     376.230 230.240 157.890  1.00  0.00            
ATOM   3961  HC  MOL    33     374.530 228.550 155.480  1.00  0.00            
ATOM   3962  HC  MOL    33     374.310 229.790 156.680  1.00  0.00            
ATOM   3963  CT  MOL    33     377.190 229.010 154.750  1.00  0.00            
ATOM   3964  HC  MOL    33     378.220 228.790 154.930  1.00  0.00            
ATOM   3965  HC  MOL    33     377.160 229.710 153.920  1.00  0.00            
ATOM   3966  HC  MOL    33     376.700 228.100 154.410  1.00  0.00            
ATOM   3967  CT  MOL    33     374.410 230.580 154.660  1.00  0.00            
ATOM   3968  CM  MOL    33     372.920 230.810 154.740  1.00  0.00            
ATOM   3969  CM  MOL    33     371.960 230.490 153.890  1.00  0.00            
ATOM   3970  CT  MOL    33     370.510 230.750 154.260  1.00  0.00            
ATOM   3971  HC  MOL    33     374.910 231.540 154.790  1.00  0.00            
ATOM   3972  HC  MOL    33     374.670 230.280 153.670  1.00  0.00            
ATOM   3973  HC  MOL    33     372.620 231.290 155.670  1.00  0.00            
ATOM   3974  HC  MOL    33     370.420 230.970 155.340  1.00  0.00            
ATOM   3975  HC  MOL    33     369.930 229.830 154.100  1.00  0.00            
ATOM   3976  CT  MOL    33     372.190 229.780 152.560  1.00  0.00            
ATOM   3977  HC  MOL    33     373.220 229.600 152.330  1.00  0.00            
ATOM   3978  HC  MOL    33     371.740 230.310 151.710  1.00  0.00            
ATOM   3979  HC  MOL    33     371.700 228.810 152.550  1.00  0.00            
ATOM   3980  CT  MOL    33     369.800 231.880 153.500  1.00  0.00            
ATOM   3981  CM  MOL    33     368.370 232.120 153.970  1.00  0.00            
ATOM   3982  CM  MOL    33     367.190 231.810 153.430  1.00  0.00            
ATOM   3983  CT  MOL    33     365.880 232.250 154.080  1.00  0.00            
ATOM   3984  HC  MOL    33     370.360 232.800 153.650  1.00  0.00            
ATOM   3985  HC  MOL    33     369.860 231.670 152.430  1.00  0.00            
ATOM   3986  HC  MOL    33     368.340 232.690 154.900  1.00  0.00            
ATOM   3987  HC  MOL    33     365.270 232.890 153.420  1.00  0.00            
ATOM   3988  HC  MOL    33     366.110 232.840 154.970  1.00  0.00            
ATOM   3989  HC  MOL    33     365.290 231.400 154.400  1.00  0.00            
ATOM   3990  CT  MOL    33     366.950 231.030 152.150  1.00  0.00            
ATOM   3991  HC  MOL    33     367.850 230.630 151.700  1.00  0.00            
ATOM   3992  HC  MOL    33     366.500 231.620 151.360  1.00  0.00            
ATOM   3993  HC  MOL    33     366.290 230.190 152.320  1.00  0.00            
ATOM   3994  CS  MOL    34     382.720 219.960 159.380  1.00  0.00            
ATOM   3995  CW  MOL    34     381.250 219.460 159.730  1.00  0.00            
ATOM   3996  NA  MOL    34     380.340 220.550 159.320  1.00  0.00            
ATOM   3997  CW  MOL    34     381.140 221.660 158.710  1.00  0.00            
ATOM   3998  CS  MOL    34     382.640 221.280 158.820  1.00  0.00            
ATOM   3999  CM  MOL    34     380.660 222.800 158.150  1.00  0.00            
ATOM   4000  CW  MOL    34     379.300 223.230 158.050  1.00  0.00            
ATOM   4001  CS  MOL    34     378.840 224.570 157.420  1.00  0.00            
ATOM   4002  CS  MOL    34     377.400 224.670 157.560  1.00  0.00            
ATOM   4003  CW  MOL    34     376.910 223.390 158.270  1.00  0.00            
ATOM   4004  NA  MOL    34     378.140 222.540 158.520  1.00  0.00            
ATOM   4005  CM  MOL    34     375.620 223.090 158.600  1.00  0.00            
ATOM   4006  CW  MOL    34     375.200 221.880 159.170  1.00  0.00            
ATOM   4007  CS  MOL    34     373.820 221.440 159.600  1.00  0.00            
ATOM   4008  CS  MOL    34     374.010 220.070 160.240  1.00  0.00            
ATOM   4009  CW  MOL    34     375.520 219.760 160.160  1.00  0.00            
ATOM   4010  NA  MOL    34     376.230 220.820 159.520  1.00  0.00            
ATOM   4011  CM  MOL    34     375.880 218.440 160.770  1.00  0.00            
ATOM   4012  CT  MOL    34     374.470 217.840 161.290  1.00  0.00            
ATOM   4013  C_2 MOL    34     373.280 218.900 160.970  1.00  0.00            
ATOM   4014  CW  MOL    34     377.110 217.960 160.840  1.00  0.00            
ATOM   4015  NA  MOL    34     378.370 218.650 160.400  1.00  0.00            
ATOM   4016  CW  MOL    34     379.540 217.910 160.680  1.00  0.00            
ATOM   4017  CT  MOL    34     379.150 216.530 161.380  1.00  0.00            
ATOM   4018  CT  MOL    34     377.510 216.540 161.480  1.00  0.00            
ATOM   4019  CM  MOL    34     380.870 218.240 160.330  1.00  0.00            
ATOM   4020  MG  MOL    34     378.290 220.570 159.300  1.00  0.00            
ATOM   4021  CT  MOL    34     384.030 219.190 159.530  1.00  0.00            
ATOM   4022  HC  MOL    34     384.150 218.750 160.500  1.00  0.00            
ATOM   4023  HC  MOL    34     384.070 218.380 158.790  1.00  0.00            
ATOM   4024  HC  MOL    34     384.860 219.820 159.400  1.00  0.00            
ATOM   4025  CT  MOL    34     383.750 222.230 158.350  1.00  0.00            
ATOM   4026  OH  MOL    34     384.850 222.310 159.220  1.00  0.00            
ATOM   4027  HO  MOL    34     385.420 221.590 158.980  1.00  0.00            
ATOM   4028  CT  MOL    34     384.240 221.940 156.950  1.00  0.00            
ATOM   4029  HC  MOL    34     384.730 220.940 156.900  1.00  0.00            
ATOM   4030  HC  MOL    34     384.940 222.710 156.590  1.00  0.00            
ATOM   4031  HC  MOL    34     383.390 222.040 156.280  1.00  0.00            
ATOM   4032  HC  MOL    34     383.330 223.190 158.330  1.00  0.00            
ATOM   4033  HC  MOL    34     381.380 223.470 157.730  1.00  0.00            
ATOM   4034  CT  MOL    34     376.530 225.830 157.110  1.00  0.00            
ATOM   4035  CT  MOL    34     375.870 226.590 158.260  1.00  0.00            
ATOM   4036  HC  MOL    34     376.650 227.040 158.880  1.00  0.00            
ATOM   4037  HC  MOL    34     375.320 225.930 158.890  1.00  0.00            
ATOM   4038  HC  MOL    34     375.220 227.360 157.880  1.00  0.00            
ATOM   4039  HC  MOL    34     377.150 226.530 156.580  1.00  0.00            
ATOM   4040  HC  MOL    34     375.780 225.500 156.440  1.00  0.00            
ATOM   4041  HC  MOL    34     374.830 223.800 158.390  1.00  0.00            
ATOM   4042  CT  MOL    34     372.480 222.180 159.390  1.00  0.00            
ATOM   4043  CT  MOL    34     372.000 222.940 160.640  1.00  0.00            
ATOM   4044  HC  MOL    34     372.760 223.610 160.980  1.00  0.00            
ATOM   4045  HC  MOL    34     371.800 222.260 161.480  1.00  0.00            
ATOM   4046  HC  MOL    34     371.080 223.490 160.450  1.00  0.00            
ATOM   4047  HC  MOL    34     371.750 221.420 159.150  1.00  0.00            
ATOM   4048  HC  MOL    34     372.550 222.870 158.560  1.00  0.00            
ATOM   4049  O_2 MOL    34     372.140 218.720 161.300  1.00  0.00            
ATOM   4050  HC  MOL    34     374.220 216.880 160.800  1.00  0.00            
ATOM   4051  HC  MOL    34     374.440 217.600 162.330  1.00  0.00            
ATOM   4052  CT  MOL    34     379.690 216.400 162.830  1.00  0.00            
ATOM   4053  HC  MOL    34     380.770 216.390 162.920  1.00  0.00            
ATOM   4054  HC  MOL    34     379.280 217.160 163.500  1.00  0.00            
ATOM   4055  HC  MOL    34     379.370 215.420 163.200  1.00  0.00            
ATOM   4056  HC  MOL    34     379.500 215.730 160.770  1.00  0.00            
ATOM   4057  CT  MOL    34     379.750 225.510 156.680  1.00  0.00            
ATOM   4058  HC  MOL    34     379.970 226.350 157.330  1.00  0.00            
ATOM   4059  HC  MOL    34     380.690 225.070 156.410  1.00  0.00            
ATOM   4060  HC  MOL    34     379.330 225.930 155.790  1.00  0.00            
ATOM   4061  CT  MOL    34     381.970 217.180 160.550  1.00  0.00            
ATOM   4062  HC  MOL    34     382.610 217.100 159.680  1.00  0.00            
ATOM   4063  HC  MOL    34     381.670 216.140 160.680  1.00  0.00            
ATOM   4064  HC  MOL    34     382.620 217.440 161.370  1.00  0.00            
ATOM   4065  HC  MOL    34     377.120 216.510 162.520  1.00  0.00            
ATOM   4066  CT  MOL    34     376.870 215.360 160.730  1.00  0.00            
ATOM   4067  CT  MOL    34     377.120 213.980 161.400  1.00  0.00            
ATOM   4068  HC  MOL    34     377.230 215.370 159.700  1.00  0.00            
ATOM   4069  HC  MOL    34     375.800 215.500 160.650  1.00  0.00            
ATOM   4070  HC  MOL    34     376.910 213.170 160.700  1.00  0.00            
ATOM   4071  HC  MOL    34     378.150 213.840 161.680  1.00  0.00            
ATOM   4072  C_2 MOL    34     376.290 213.680 162.640  1.00  0.00            
ATOM   4073  OS  MOL    34     377.030 213.660 163.770  1.00  0.00            
ATOM   4074  O_2 MOL    34     375.120 213.520 162.640  1.00  0.00            
ATOM   4075  CT  MOL    34     376.350 213.380 165.010  1.00  0.00            
ATOM   4076  CM  MOL    34     377.350 213.700 166.100  1.00  0.00            
ATOM   4077  CM  MOL    34     377.820 212.970 167.100  1.00  0.00            
ATOM   4078  CT  MOL    34     378.840 213.550 168.090  1.00  0.00            
ATOM   4079  HC  MOL    34     375.990 212.350 165.030  1.00  0.00            
ATOM   4080  HC  MOL    34     375.480 214.020 165.090  1.00  0.00            
ATOM   4081  HC  MOL    34     377.710 214.710 166.000  1.00  0.00            
ATOM   4082  HC  MOL    34     379.680 212.860 168.170  1.00  0.00            
ATOM   4083  HC  MOL    34     379.320 214.450 167.670  1.00  0.00            
ATOM   4084  CT  MOL    34     377.490 211.520 167.360  1.00  0.00            
ATOM   4085  HC  MOL    34     376.870 211.080 166.610  1.00  0.00            
ATOM   4086  HC  MOL    34     376.950 211.420 168.300  1.00  0.00            
ATOM   4087  HC  MOL    34     378.380 210.890 167.460  1.00  0.00            
ATOM   4088  CT  MOL    34     378.290 213.820 169.510  1.00  0.00            
ATOM   4089  CM  MOL    34     379.340 214.430 170.430  1.00  0.00            
ATOM   4090  CM  MOL    34     379.950 213.910 171.500  1.00  0.00            
ATOM   4091  CT  MOL    34     380.840 214.760 172.390  1.00  0.00            
ATOM   4092  HC  MOL    34     377.460 214.520 169.420  1.00  0.00            
ATOM   4093  HC  MOL    34     377.890 212.940 169.960  1.00  0.00            
ATOM   4094  HC  MOL    34     379.570 215.450 170.140  1.00  0.00            
ATOM   4095  HC  MOL    34     380.570 214.520 173.420  1.00  0.00            
ATOM   4096  HC  MOL    34     380.590 215.800 172.310  1.00  0.00            
ATOM   4097  CT  MOL    34     379.770 212.480 171.960  1.00  0.00            
ATOM   4098  HC  MOL    34     379.160 211.830 171.360  1.00  0.00            
ATOM   4099  HC  MOL    34     379.420 212.450 172.980  1.00  0.00            
ATOM   4100  HC  MOL    34     380.730 211.950 171.990  1.00  0.00            
ATOM   4101  CT  MOL    34     382.350 214.520 172.250  1.00  0.00            
ATOM   4102  CM  MOL    34     383.090 215.250 173.330  1.00  0.00            
ATOM   4103  CM  MOL    34     383.980 214.850 174.220  1.00  0.00            
ATOM   4104  CT  MOL    34     384.530 215.820 175.230  1.00  0.00            
ATOM   4105  HC  MOL    34     382.570 213.460 172.350  1.00  0.00            
ATOM   4106  HC  MOL    34     382.630 214.850 171.260  1.00  0.00            
ATOM   4107  HC  MOL    34     382.850 216.310 173.400  1.00  0.00            
ATOM   4108  HC  MOL    34     384.200 215.580 176.250  1.00  0.00            
ATOM   4109  HC  MOL    34     384.230 216.860 175.050  1.00  0.00            
ATOM   4110  HC  MOL    34     385.630 215.820 175.250  1.00  0.00            
ATOM   4111  CT  MOL    34     384.510 213.430 174.440  1.00  0.00            
ATOM   4112  HC  MOL    34     385.580 213.370 174.340  1.00  0.00            
ATOM   4113  HC  MOL    34     384.040 212.710 173.820  1.00  0.00            
ATOM   4114  HC  MOL    34     384.300 213.130 175.440  1.00  0.00            
ATOM   4115  CS  MOL    35     401.040 233.240 163.700  1.00  0.00            
ATOM   4116  CW  MOL    35     399.510 232.810 163.760  1.00  0.00            
ATOM   4117  NA  MOL    35     399.420 231.580 164.520  1.00  0.00            
ATOM   4118  CW  MOL    35     400.830 231.100 164.840  1.00  0.00            
ATOM   4119  CS  MOL    35     401.810 232.210 164.370  1.00  0.00            
ATOM   4120  CM  MOL    35     401.200 229.870 165.290  1.00  0.00            
ATOM   4121  CW  MOL    35     400.350 228.790 165.730  1.00  0.00            
ATOM   4122  CS  MOL    35     400.850 227.420 166.220  1.00  0.00            
ATOM   4123  CS  MOL    35     399.690 226.720 166.760  1.00  0.00            
ATOM   4124  CW  MOL    35     398.450 227.610 166.590  1.00  0.00            
ATOM   4125  NA  MOL    35     398.920 228.870 165.910  1.00  0.00            
ATOM   4126  CM  MOL    35     397.200 227.340 167.010  1.00  0.00            
ATOM   4127  CW  MOL    35     396.100 228.150 166.750  1.00  0.00            
ATOM   4128  CS  MOL    35     394.650 227.980 167.120  1.00  0.00            
ATOM   4129  CS  MOL    35     393.890 229.140 166.510  1.00  0.00            
ATOM   4130  CW  MOL    35     394.950 230.000 165.800  1.00  0.00            
ATOM   4131  NA  MOL    35     396.240 229.430 165.950  1.00  0.00            
ATOM   4132  CM  MOL    35     394.350 231.160 165.070  1.00  0.00            
ATOM   4133  CT  MOL    35     392.750 231.090 165.380  1.00  0.00            
ATOM   4134  C_2 MOL    35     392.500 229.780 166.340  1.00  0.00            
ATOM   4135  CW  MOL    35     395.080 232.060 164.370  1.00  0.00            
ATOM   4136  NA  MOL    35     396.570 232.010 164.180  1.00  0.00            
ATOM   4137  CW  MOL    35     397.040 233.130 163.430  1.00  0.00            
ATOM   4138  CT  MOL    35     395.800 233.980 162.890  1.00  0.00            
ATOM   4139  CT  MOL    35     394.490 233.300 163.550  1.00  0.00            
ATOM   4140  CM  MOL    35     398.390 233.550 163.240  1.00  0.00            
ATOM   4141  MG  MOL    35     397.810 230.340 164.900  1.00  0.00            
ATOM   4142  CT  MOL    35     401.640 234.420 163.000  1.00  0.00            
ATOM   4143  HC  MOL    35     401.250 234.500 162.000  1.00  0.00            
ATOM   4144  HC  MOL    35     401.520 235.360 163.510  1.00  0.00            
ATOM   4145  HC  MOL    35     402.690 234.280 162.910  1.00  0.00            
ATOM   4146  CT  MOL    35     403.290 232.180 164.590  1.00  0.00            
ATOM   4147  OH  MOL    35     403.830 233.430 164.980  1.00  0.00            
ATOM   4148  HO  MOL    35     404.790 233.490 164.910  1.00  0.00            
ATOM   4149  CT  MOL    35     404.030 231.570 163.390  1.00  0.00            
ATOM   4150  HC  MOL    35     403.980 232.260 162.540  1.00  0.00            
ATOM   4151  HC  MOL    35     403.510 230.640 163.080  1.00  0.00            
ATOM   4152  HC  MOL    35     405.050 231.360 163.620  1.00  0.00            
ATOM   4153  HC  MOL    35     403.450 231.530 165.440  1.00  0.00            
ATOM   4154  HC  MOL    35     402.250 229.610 165.310  1.00  0.00            
ATOM   4155  CT  MOL    35     399.670 225.320 167.310  1.00  0.00            
ATOM   4156  CT  MOL    35     399.600 225.250 168.870  1.00  0.00            
ATOM   4157  HC  MOL    35     400.460 225.660 169.370  1.00  0.00            
ATOM   4158  HC  MOL    35     399.560 224.180 169.160  1.00  0.00            
ATOM   4159  HC  MOL    35     398.700 225.720 169.280  1.00  0.00            
ATOM   4160  HC  MOL    35     400.540 224.790 166.990  1.00  0.00            
ATOM   4161  HC  MOL    35     398.880 224.700 166.910  1.00  0.00            
ATOM   4162  HC  MOL    35     397.040 226.440 167.550  1.00  0.00            
ATOM   4163  CT  MOL    35     394.100 226.900 168.000  1.00  0.00            
ATOM   4164  CT  MOL    35     392.620 226.990 168.240  1.00  0.00            
ATOM   4165  HC  MOL    35     392.390 227.930 168.740  1.00  0.00            
ATOM   4166  HC  MOL    35     392.340 226.180 168.910  1.00  0.00            
ATOM   4167  HC  MOL    35     392.060 226.910 167.300  1.00  0.00            
ATOM   4168  HC  MOL    35     394.590 226.930 168.970  1.00  0.00            
ATOM   4169  HC  MOL    35     394.260 225.910 167.570  1.00  0.00            
ATOM   4170  O_2 MOL    35     391.410 229.460 166.730  1.00  0.00            
ATOM   4171  HC  MOL    35     392.330 231.960 165.840  1.00  0.00            
ATOM   4172  HC  MOL    35     392.150 230.900 164.480  1.00  0.00            
ATOM   4173  CT  MOL    35     395.690 233.870 161.340  1.00  0.00            
ATOM   4174  HC  MOL    35     396.590 234.160 160.850  1.00  0.00            
ATOM   4175  HC  MOL    35     395.510 232.850 161.040  1.00  0.00            
ATOM   4176  HC  MOL    35     394.850 234.470 160.950  1.00  0.00            
ATOM   4177  HC  MOL    35     395.930 235.010 163.200  1.00  0.00            
ATOM   4178  CT  MOL    35     402.300 226.970 166.160  1.00  0.00            
ATOM   4179  HC  MOL    35     402.360 225.910 166.290  1.00  0.00            
ATOM   4180  HC  MOL    35     402.790 227.220 165.180  1.00  0.00            
ATOM   4181  HC  MOL    35     402.840 227.390 166.990  1.00  0.00            
ATOM   4182  CT  MOL    35     398.660 234.880 162.500  1.00  0.00            
ATOM   4183  HC  MOL    35     398.980 234.690 161.490  1.00  0.00            
ATOM   4184  HC  MOL    35     399.340 235.570 162.980  1.00  0.00            
ATOM   4185  HC  MOL    35     397.760 235.450 162.350  1.00  0.00            
ATOM   4186  HC  MOL    35     393.830 232.900 162.820  1.00  0.00            
ATOM   4187  CT  MOL    35     393.650 234.270 164.450  1.00  0.00            
ATOM   4188  CT  MOL    35     392.120 234.350 164.210  1.00  0.00            
ATOM   4189  HC  MOL    35     394.100 235.260 164.480  1.00  0.00            
ATOM   4190  HC  MOL    35     393.830 233.930 165.450  1.00  0.00            
ATOM   4191  HC  MOL    35     391.660 233.390 164.150  1.00  0.00            
ATOM   4192  HC  MOL    35     391.730 234.940 165.060  1.00  0.00            
ATOM   4193  C_2 MOL    35     391.710 235.090 162.950  1.00  0.00            
ATOM   4194  OS  MOL    35     390.480 235.540 163.070  1.00  0.00            
ATOM   4195  O_2 MOL    35     392.470 235.470 162.110  1.00  0.00            
ATOM   4196  CT  MOL    35     389.840 236.320 162.050  1.00  0.00            
ATOM   4197  CM  MOL    35     388.510 236.750 162.600  1.00  0.00            
ATOM   4198  CM  MOL    35     387.290 236.850 162.040  1.00  0.00            
ATOM   4199  CT  MOL    35     386.100 237.230 162.890  1.00  0.00            
ATOM   4200  HC  MOL    35     389.860 235.860 161.040  1.00  0.00            
ATOM   4201  HC  MOL    35     390.480 237.170 162.010  1.00  0.00            
ATOM   4202  HC  MOL    35     388.620 237.070 163.620  1.00  0.00            
ATOM   4203  HC  MOL    35     385.470 236.330 162.940  1.00  0.00            
ATOM   4204  HC  MOL    35     386.390 237.420 163.940  1.00  0.00            
ATOM   4205  CT  MOL    35     386.900 236.490 160.610  1.00  0.00            
ATOM   4206  HC  MOL    35     387.750 236.120 160.030  1.00  0.00            
ATOM   4207  HC  MOL    35     386.570 237.360 160.080  1.00  0.00            
ATOM   4208  HC  MOL    35     386.130 235.730 160.590  1.00  0.00            
ATOM   4209  CT  MOL    35     385.250 238.470 162.450  1.00  0.00            
ATOM   4210  CM  MOL    35     384.180 238.750 163.460  1.00  0.00            
ATOM   4211  CM  MOL    35     382.920 238.340 163.570  1.00  0.00            
ATOM   4212  CT  MOL    35     382.050 238.690 164.780  1.00  0.00            
ATOM   4213  HC  MOL    35     385.930 239.330 162.370  1.00  0.00            
ATOM   4214  HC  MOL    35     384.870 238.330 161.450  1.00  0.00            
ATOM   4215  HC  MOL    35     384.590 239.310 164.270  1.00  0.00            
ATOM   4216  HC  MOL    35     381.630 237.730 165.110  1.00  0.00            
ATOM   4217  HC  MOL    35     381.210 239.260 164.420  1.00  0.00            
ATOM   4218  CT  MOL    35     382.190 237.480 162.540  1.00  0.00            
ATOM   4219  HC  MOL    35     382.780 237.280 161.670  1.00  0.00            
ATOM   4220  HC  MOL    35     381.260 237.940 162.220  1.00  0.00            
ATOM   4221  HC  MOL    35     381.980 236.490 162.970  1.00  0.00            
ATOM   4222  CT  MOL    35     382.630 239.450 166.000  1.00  0.00            
ATOM   4223  CM  MOL    35     381.720 239.460 167.170  1.00  0.00            
ATOM   4224  CM  MOL    35     381.850 239.150 168.460  1.00  0.00            
ATOM   4225  CT  MOL    35     380.680 239.280 169.400  1.00  0.00            
ATOM   4226  HC  MOL    35     383.580 238.950 166.220  1.00  0.00            
ATOM   4227  HC  MOL    35     382.850 240.450 165.620  1.00  0.00            
ATOM   4228  HC  MOL    35     380.730 239.790 166.870  1.00  0.00            
ATOM   4229  HC  MOL    35     380.480 238.350 169.930  1.00  0.00            
ATOM   4230  HC  MOL    35     379.750 239.550 168.940  1.00  0.00            
ATOM   4231  HC  MOL    35     380.850 240.050 170.160  1.00  0.00            
ATOM   4232  CT  MOL    35     383.090 238.630 169.120  1.00  0.00            
ATOM   4233  HC  MOL    35     383.910 238.470 168.440  1.00  0.00            
ATOM   4234  HC  MOL    35     382.860 237.690 169.640  1.00  0.00            
ATOM   4235  HC  MOL    35     383.410 239.310 169.910  1.00  0.00            
ATOM   4236  CS  MOL    36     395.620 226.690 163.440  1.00  0.00            
ATOM   4237  CW  MOL    36     394.130 226.230 163.830  1.00  0.00            
ATOM   4238  NA  MOL    36     393.210 227.220 163.280  1.00  0.00            
ATOM   4239  CW  MOL    36     394.000 228.310 162.640  1.00  0.00            
ATOM   4240  CS  MOL    36     395.520 227.960 162.800  1.00  0.00            
ATOM   4241  CM  MOL    36     393.520 229.410 161.990  1.00  0.00            
ATOM   4242  CW  MOL    36     392.150 229.750 161.740  1.00  0.00            
ATOM   4243  CS  MOL    36     391.710 231.000 160.940  1.00  0.00            
ATOM   4244  CS  MOL    36     390.250 231.050 161.000  1.00  0.00            
ATOM   4245  CW  MOL    36     389.770 229.800 161.760  1.00  0.00            
ATOM   4246  NA  MOL    36     390.990 229.020 162.180  1.00  0.00            
ATOM   4247  CM  MOL    36     388.470 229.440 161.970  1.00  0.00            
ATOM   4248  CW  MOL    36     388.050 228.300 162.640  1.00  0.00            
ATOM   4249  CS  MOL    36     386.660 227.810 162.990  1.00  0.00            
ATOM   4250  CS  MOL    36     386.850 226.500 163.730  1.00  0.00            
ATOM   4251  CW  MOL    36     388.370 226.270 163.790  1.00  0.00            
ATOM   4252  NA  MOL    36     389.080 227.330 163.160  1.00  0.00            
ATOM   4253  CM  MOL    36     388.720 225.000 164.550  1.00  0.00            
ATOM   4254  CT  MOL    36     387.300 224.390 165.070  1.00  0.00            
ATOM   4255  C_2 MOL    36     386.110 225.350 164.470  1.00  0.00            
ATOM   4256  CW  MOL    36     389.990 224.610 164.760  1.00  0.00            
ATOM   4257  NA  MOL    36     391.240 225.320 164.360  1.00  0.00            
ATOM   4258  CW  MOL    36     392.400 224.700 164.840  1.00  0.00            
ATOM   4259  CT  MOL    36     391.980 223.390 165.710  1.00  0.00            
ATOM   4260  CT  MOL    36     390.380 223.310 165.560  1.00  0.00            
ATOM   4261  CM  MOL    36     393.760 225.090 164.570  1.00  0.00            
ATOM   4262  MG  MOL    36     391.160 227.110 163.100  1.00  0.00            
ATOM   4263  CT  MOL    36     396.940 225.950 163.630  1.00  0.00            
ATOM   4264  HC  MOL    36     397.260 225.940 164.680  1.00  0.00            
ATOM   4265  HC  MOL    36     396.950 224.950 163.240  1.00  0.00            
ATOM   4266  HC  MOL    36     397.710 226.410 163.040  1.00  0.00            
ATOM   4267  CT  MOL    36     396.650 228.910 162.340  1.00  0.00            
ATOM   4268  OH  MOL    36     397.750 229.030 163.230  1.00  0.00            
ATOM   4269  HO  MOL    36     398.120 228.160 163.390  1.00  0.00            
ATOM   4270  CT  MOL    36     397.120 228.610 160.900  1.00  0.00            
ATOM   4271  HC  MOL    36     397.640 227.650 160.870  1.00  0.00            
ATOM   4272  HC  MOL    36     397.790 229.370 160.540  1.00  0.00            
ATOM   4273  HC  MOL    36     396.250 228.590 160.230  1.00  0.00            
ATOM   4274  HC  MOL    36     396.250 229.900 162.340  1.00  0.00            
ATOM   4275  HC  MOL    36     394.220 230.100 161.570  1.00  0.00            
ATOM   4276  CT  MOL    36     389.360 232.090 160.350  1.00  0.00            
ATOM   4277  CT  MOL    36     388.600 233.010 161.330  1.00  0.00            
ATOM   4278  HC  MOL    36     389.300 233.650 161.870  1.00  0.00            
ATOM   4279  HC  MOL    36     388.040 232.410 162.030  1.00  0.00            
ATOM   4280  HC  MOL    36     387.910 233.660 160.810  1.00  0.00            
ATOM   4281  HC  MOL    36     389.950 232.680 159.680  1.00  0.00            
ATOM   4282  HC  MOL    36     388.620 231.610 159.720  1.00  0.00            
ATOM   4283  HC  MOL    36     387.720 230.120 161.620  1.00  0.00            
ATOM   4284  CT  MOL    36     385.340 228.480 162.640  1.00  0.00            
ATOM   4285  CT  MOL    36     384.760 229.350 163.750  1.00  0.00            
ATOM   4286  HC  MOL    36     385.430 230.150 163.970  1.00  0.00            
ATOM   4287  HC  MOL    36     384.600 228.780 164.660  1.00  0.00            
ATOM   4288  HC  MOL    36     383.800 229.780 163.430  1.00  0.00            
ATOM   4289  HC  MOL    36     384.640 227.690 162.380  1.00  0.00            
ATOM   4290  HC  MOL    36     385.460 229.050 161.750  1.00  0.00            
ATOM   4291  O_2 MOL    36     384.970 225.160 164.690  1.00  0.00            
ATOM   4292  HC  MOL    36     387.170 223.350 164.800  1.00  0.00            
ATOM   4293  HC  MOL    36     387.190 224.410 166.160  1.00  0.00            
ATOM   4294  CT  MOL    36     392.340 223.490 167.200  1.00  0.00            
ATOM   4295  HC  MOL    36     393.390 223.520 167.370  1.00  0.00            
ATOM   4296  HC  MOL    36     391.860 224.370 167.660  1.00  0.00            
ATOM   4297  HC  MOL    36     391.890 222.660 167.720  1.00  0.00            
ATOM   4298  HC  MOL    36     392.410 222.490 165.300  1.00  0.00            
ATOM   4299  CT  MOL    36     392.640 231.940 160.220  1.00  0.00            
ATOM   4300  HC  MOL    36     392.220 232.270 159.270  1.00  0.00            
ATOM   4301  HC  MOL    36     392.840 232.840 160.800  1.00  0.00            
ATOM   4302  HC  MOL    36     393.600 231.520 159.970  1.00  0.00            
ATOM   4303  CT  MOL    36     394.890 224.100 165.050  1.00  0.00            
ATOM   4304  HC  MOL    36     395.520 223.720 164.270  1.00  0.00            
ATOM   4305  HC  MOL    36     394.560 223.180 165.540  1.00  0.00            
ATOM   4306  HC  MOL    36     395.590 224.560 165.750  1.00  0.00            
ATOM   4307  HC  MOL    36     389.880 223.400 166.500  1.00  0.00            
ATOM   4308  CT  MOL    36     389.920 222.000 164.820  1.00  0.00            
ATOM   4309  CT  MOL    36     389.820 220.720 165.710  1.00  0.00            
ATOM   4310  HC  MOL    36     390.540 221.830 163.980  1.00  0.00            
ATOM   4311  HC  MOL    36     388.940 222.150 164.450  1.00  0.00            
ATOM   4312  HC  MOL    36     389.550 219.880 165.080  1.00  0.00            
ATOM   4313  HC  MOL    36     390.810 220.500 166.110  1.00  0.00            
ATOM   4314  C_2 MOL    36     388.860 220.730 166.900  1.00  0.00            
ATOM   4315  OS  MOL    36     387.590 220.570 166.530  1.00  0.00            
ATOM   4316  O_2 MOL    36     389.260 220.770 168.010  1.00  0.00            
ATOM   4317  CT  MOL    36     386.520 220.450 167.460  1.00  0.00            
ATOM   4318  CM  MOL    36     386.290 218.980 167.740  1.00  0.00            
ATOM   4319  CM  MOL    36     385.220 218.200 167.510  1.00  0.00            
ATOM   4320  CT  MOL    36     385.270 216.710 167.730  1.00  0.00            
ATOM   4321  HC  MOL    36     385.660 220.960 167.080  1.00  0.00            
ATOM   4322  HC  MOL    36     386.750 221.000 168.370  1.00  0.00            
ATOM   4323  HC  MOL    36     387.160 218.490 168.140  1.00  0.00            
ATOM   4324  HC  MOL    36     384.880 216.230 166.820  1.00  0.00            
ATOM   4325  HC  MOL    36     386.320 216.390 167.750  1.00  0.00            
ATOM   4326  CT  MOL    36     383.890 218.710 166.960  1.00  0.00            
ATOM   4327  HC  MOL    36     383.880 219.760 166.770  1.00  0.00            
ATOM   4328  HC  MOL    36     383.110 218.510 167.670  1.00  0.00            
ATOM   4329  HC  MOL    36     383.590 218.230 166.030  1.00  0.00            
ATOM   4330  CT  MOL    36     384.540 216.180 169.020  1.00  0.00            
ATOM   4331  CM  MOL    36     385.290 216.670 170.230  1.00  0.00            
ATOM   4332  CM  MOL    36     386.060 216.040 171.120  1.00  0.00            
ATOM   4333  CT  MOL    36     386.750 216.750 172.290  1.00  0.00            
ATOM   4334  HC  MOL    36     383.540 216.620 169.070  1.00  0.00            
ATOM   4335  HC  MOL    36     384.390 215.130 168.940  1.00  0.00            
ATOM   4336  HC  MOL    36     385.160 217.730 170.360  1.00  0.00            
ATOM   4337  HC  MOL    36     387.810 216.810 172.150  1.00  0.00            
ATOM   4338  HC  MOL    36     386.550 216.130 173.190  1.00  0.00            
ATOM   4339  CT  MOL    36     386.380 214.550 171.080  1.00  0.00            
ATOM   4340  HC  MOL    36     385.980 214.070 170.220  1.00  0.00            
ATOM   4341  HC  MOL    36     386.030 214.090 172.000  1.00  0.00            
ATOM   4342  HC  MOL    36     387.430 214.370 171.050  1.00  0.00            
ATOM   4343  CT  MOL    36     386.280 218.160 172.670  1.00  0.00            
ATOM   4344  CM  MOL    36     386.980 218.700 173.910  1.00  0.00            
ATOM   4345  CM  MOL    36     386.480 219.300 175.000  1.00  0.00            
ATOM   4346  CT  MOL    36     387.370 219.720 176.140  1.00  0.00            
ATOM   4347  HC  MOL    36     386.500 218.770 171.810  1.00  0.00            
ATOM   4348  HC  MOL    36     385.200 218.100 172.830  1.00  0.00            
ATOM   4349  HC  MOL    36     388.050 218.580 173.870  1.00  0.00            
ATOM   4350  HC  MOL    36     387.440 220.790 176.260  1.00  0.00            
ATOM   4351  HC  MOL    36     388.340 219.300 176.050  1.00  0.00            
ATOM   4352  HC  MOL    36     386.940 219.310 177.050  1.00  0.00            
ATOM   4353  CT  MOL    36     385.040 219.670 175.180  1.00  0.00            
ATOM   4354  HC  MOL    36     384.580 219.100 176.010  1.00  0.00            
ATOM   4355  HC  MOL    36     384.460 219.550 174.260  1.00  0.00            
ATOM   4356  HC  MOL    36     384.980 220.750 175.410  1.00  0.00            
ATOM   4357  CS  MOL    37     413.330 240.690 167.160  1.00  0.00            
ATOM   4358  CW  MOL    37     411.750 240.530 167.150  1.00  0.00            
ATOM   4359  NA  MOL    37     411.430 239.500 168.170  1.00  0.00            
ATOM   4360  CW  MOL    37     412.680 239.070 168.840  1.00  0.00            
ATOM   4361  CS  MOL    37     413.850 239.890 168.230  1.00  0.00            
ATOM   4362  CM  MOL    37     412.840 238.100 169.770  1.00  0.00            
ATOM   4363  CW  MOL    37     411.850 237.240 170.340  1.00  0.00            
ATOM   4364  CS  MOL    37     412.140 236.080 171.310  1.00  0.00            
ATOM   4365  CS  MOL    37     410.850 235.500 171.680  1.00  0.00            
ATOM   4366  CW  MOL    37     409.760 236.290 170.960  1.00  0.00            
ATOM   4367  NA  MOL    37     410.440 237.350 170.110  1.00  0.00            
ATOM   4368  CM  MOL    37     408.420 236.090 171.060  1.00  0.00            
ATOM   4369  CW  MOL    37     407.430 236.840 170.380  1.00  0.00            
ATOM   4370  CS  MOL    37     405.940 236.860 170.520  1.00  0.00            
ATOM   4371  CS  MOL    37     405.420 237.920 169.580  1.00  0.00            
ATOM   4372  CW  MOL    37     406.650 238.550 168.930  1.00  0.00            
ATOM   4373  NA  MOL    37     407.840 237.940 169.410  1.00  0.00            
ATOM   4374  CM  MOL    37     406.310 239.630 167.950  1.00  0.00            
ATOM   4375  CT  MOL    37     404.670 239.690 167.940  1.00  0.00            
ATOM   4376  C_2 MOL    37     404.130 238.580 169.050  1.00  0.00            
ATOM   4377  CW  MOL    37     407.210 240.310 167.240  1.00  0.00            
ATOM   4378  NA  MOL    37     408.700 240.130 167.330  1.00  0.00            
ATOM   4379  CW  MOL    37     409.410 240.980 166.430  1.00  0.00            
ATOM   4380  CT  MOL    37     408.340 241.800 165.520  1.00  0.00            
ATOM   4381  CT  MOL    37     406.870 241.420 166.160  1.00  0.00            
ATOM   4382  CM  MOL    37     410.820 241.200 166.340  1.00  0.00            
ATOM   4383  MG  MOL    37     409.630 238.560 168.550  1.00  0.00            
ATOM   4384  CT  MOL    37     414.210 241.540 166.210  1.00  0.00            
ATOM   4385  HC  MOL    37     413.860 241.500 165.200  1.00  0.00            
ATOM   4386  HC  MOL    37     414.290 242.570 166.510  1.00  0.00            
ATOM   4387  HC  MOL    37     415.170 241.110 166.190  1.00  0.00            
ATOM   4388  CT  MOL    37     415.280 239.830 168.810  1.00  0.00            
ATOM   4389  OH  MOL    37     415.910 241.110 168.740  1.00  0.00            
ATOM   4390  HO  MOL    37     416.050 241.410 167.850  1.00  0.00            
ATOM   4391  CT  MOL    37     416.130 238.740 168.170  1.00  0.00            
ATOM   4392  HC  MOL    37     416.260 238.910 167.110  1.00  0.00            
ATOM   4393  HC  MOL    37     415.700 237.770 168.300  1.00  0.00            
ATOM   4394  HC  MOL    37     417.130 238.720 168.610  1.00  0.00            
ATOM   4395  HC  MOL    37     415.210 239.590 169.880  1.00  0.00            
ATOM   4396  HC  MOL    37     413.810 237.910 170.130  1.00  0.00            
ATOM   4397  CT  MOL    37     410.590 234.340 172.580  1.00  0.00            
ATOM   4398  CT  MOL    37     410.390 234.750 174.070  1.00  0.00            
ATOM   4399  HC  MOL    37     411.240 235.320 174.480  1.00  0.00            
ATOM   4400  HC  MOL    37     410.210 233.860 174.710  1.00  0.00            
ATOM   4401  HC  MOL    37     409.490 235.360 174.150  1.00  0.00            
ATOM   4402  HC  MOL    37     411.440 233.700 172.540  1.00  0.00            
ATOM   4403  HC  MOL    37     409.750 233.760 172.260  1.00  0.00            
ATOM   4404  HC  MOL    37     408.080 235.290 171.700  1.00  0.00            
ATOM   4405  CT  MOL    37     405.090 236.100 171.510  1.00  0.00            
ATOM   4406  CT  MOL    37     404.780 234.670 171.120  1.00  0.00            
ATOM   4407  HC  MOL    37     404.230 234.630 170.180  1.00  0.00            
ATOM   4408  HC  MOL    37     404.210 234.190 171.930  1.00  0.00            
ATOM   4409  HC  MOL    37     405.690 234.130 170.970  1.00  0.00            
ATOM   4410  HC  MOL    37     404.150 236.620 171.630  1.00  0.00            
ATOM   4411  HC  MOL    37     405.550 236.110 172.490  1.00  0.00            
ATOM   4412  O_2 MOL    37     402.960 238.390 169.310  1.00  0.00            
ATOM   4413  HC  MOL    37     404.280 240.640 168.220  1.00  0.00            
ATOM   4414  HC  MOL    37     404.170 239.510 167.020  1.00  0.00            
ATOM   4415  CT  MOL    37     408.410 241.380 164.030  1.00  0.00            
ATOM   4416  HC  MOL    37     409.380 241.570 163.530  1.00  0.00            
ATOM   4417  HC  MOL    37     408.190 240.330 163.920  1.00  0.00            
ATOM   4418  HC  MOL    37     407.700 241.930 163.440  1.00  0.00            
ATOM   4419  HC  MOL    37     408.560 242.850 165.580  1.00  0.00            
ATOM   4420  CT  MOL    37     413.550 235.630 171.730  1.00  0.00            
ATOM   4421  HC  MOL    37     413.890 234.820 171.120  1.00  0.00            
ATOM   4422  HC  MOL    37     414.230 236.450 171.620  1.00  0.00            
ATOM   4423  HC  MOL    37     413.610 235.280 172.750  1.00  0.00            
ATOM   4424  CT  MOL    37     411.330 242.270 165.380  1.00  0.00            
ATOM   4425  HC  MOL    37     411.730 241.870 164.470  1.00  0.00            
ATOM   4426  HC  MOL    37     412.020 243.020 165.800  1.00  0.00            
ATOM   4427  HC  MOL    37     410.560 242.900 165.010  1.00  0.00            
ATOM   4428  HC  MOL    37     406.190 241.010 165.430  1.00  0.00            
ATOM   4429  CT  MOL    37     406.160 242.680 166.800  1.00  0.00            
ATOM   4430  CT  MOL    37     404.670 242.910 166.350  1.00  0.00            
ATOM   4431  HC  MOL    37     406.640 243.610 166.580  1.00  0.00            
ATOM   4432  HC  MOL    37     406.170 242.590 167.880  1.00  0.00            
ATOM   4433  HC  MOL    37     404.120 242.000 166.480  1.00  0.00            
ATOM   4434  HC  MOL    37     404.290 243.650 167.050  1.00  0.00            
ATOM   4435  C_2 MOL    37     404.480 243.420 164.930  1.00  0.00            
ATOM   4436  OS  MOL    37     403.190 243.610 164.640  1.00  0.00            
ATOM   4437  O_2 MOL    37     405.370 243.720 164.190  1.00  0.00            
ATOM   4438  CT  MOL    37     402.760 244.190 163.390  1.00  0.00            
ATOM   4439  CM  MOL    37     401.250 244.090 163.460  1.00  0.00            
ATOM   4440  CM  MOL    37     400.350 243.600 162.630  1.00  0.00            
ATOM   4441  CT  MOL    37     398.870 243.570 163.000  1.00  0.00            
ATOM   4442  HC  MOL    37     403.180 243.690 162.560  1.00  0.00            
ATOM   4443  HC  MOL    37     403.180 245.210 163.340  1.00  0.00            
ATOM   4444  HC  MOL    37     400.890 244.560 164.340  1.00  0.00            
ATOM   4445  HC  MOL    37     398.520 242.570 162.950  1.00  0.00            
ATOM   4446  HC  MOL    37     398.740 243.830 164.040  1.00  0.00            
ATOM   4447  CT  MOL    37     400.650 242.900 161.330  1.00  0.00            
ATOM   4448  HC  MOL    37     401.660 242.940 161.030  1.00  0.00            
ATOM   4449  HC  MOL    37     400.110 243.340 160.500  1.00  0.00            
ATOM   4450  HC  MOL    37     400.300 241.870 161.420  1.00  0.00            
ATOM   4451  CT  MOL    37     397.970 244.500 162.160  1.00  0.00            
ATOM   4452  CM  MOL    37     396.600 244.630 162.750  1.00  0.00            
ATOM   4453  CM  MOL    37     395.420 244.210 162.320  1.00  0.00            
ATOM   4454  CT  MOL    37     394.180 244.360 163.190  1.00  0.00            
ATOM   4455  HC  MOL    37     398.410 245.460 162.110  1.00  0.00            
ATOM   4456  HC  MOL    37     398.020 244.150 161.130  1.00  0.00            
ATOM   4457  HC  MOL    37     396.570 245.150 163.740  1.00  0.00            
ATOM   4458  HC  MOL    37     394.470 244.740 164.170  1.00  0.00            
ATOM   4459  HC  MOL    37     393.710 243.390 163.300  1.00  0.00            
ATOM   4460  CT  MOL    37     395.150 243.510 160.980  1.00  0.00            
ATOM   4461  HC  MOL    37     396.060 243.240 160.480  1.00  0.00            
ATOM   4462  HC  MOL    37     394.550 244.110 160.310  1.00  0.00            
ATOM   4463  HC  MOL    37     394.600 242.590 161.100  1.00  0.00            
ATOM   4464  CT  MOL    37     393.120 245.360 162.670  1.00  0.00            
ATOM   4465  CM  MOL    37     391.870 245.360 163.510  1.00  0.00            
ATOM   4466  CM  MOL    37     390.680 244.820 163.300  1.00  0.00            
ATOM   4467  CT  MOL    37     389.540 245.020 164.270  1.00  0.00            
ATOM   4468  HC  MOL    37     393.540 246.360 162.710  1.00  0.00            
ATOM   4469  HC  MOL    37     392.850 245.180 161.630  1.00  0.00            
ATOM   4470  HC  MOL    37     391.950 246.010 164.370  1.00  0.00            
ATOM   4471  HC  MOL    37     388.630 245.270 163.730  1.00  0.00            
ATOM   4472  HC  MOL    37     389.770 245.810 164.970  1.00  0.00            
ATOM   4473  HC  MOL    37     389.270 244.140 164.830  1.00  0.00            
ATOM   4474  CT  MOL    37     390.290 243.880 162.160  1.00  0.00            
ATOM   4475  HC  MOL    37     391.100 243.700 161.480  1.00  0.00            
ATOM   4476  HC  MOL    37     389.490 244.300 161.560  1.00  0.00            
ATOM   4477  HC  MOL    37     389.950 242.920 162.520  1.00  0.00            
ATOM   4478  CS  MOL    38     407.740 234.370 167.630  1.00  0.00            
ATOM   4479  CW  MOL    38     406.230 233.830 167.830  1.00  0.00            
ATOM   4480  NA  MOL    38     405.370 234.750 167.100  1.00  0.00            
ATOM   4481  CW  MOL    38     406.190 235.810 166.410  1.00  0.00            
ATOM   4482  CS  MOL    38     407.670 235.540 166.790  1.00  0.00            
ATOM   4483  CM  MOL    38     405.750 236.820 165.630  1.00  0.00            
ATOM   4484  CW  MOL    38     404.410 237.190 165.280  1.00  0.00            
ATOM   4485  CS  MOL    38     404.000 238.390 164.390  1.00  0.00            
ATOM   4486  CS  MOL    38     402.560 238.480 164.370  1.00  0.00            
ATOM   4487  CW  MOL    38     402.020 237.330 165.230  1.00  0.00            
ATOM   4488  NA  MOL    38     403.220 236.530 165.730  1.00  0.00            
ATOM   4489  CM  MOL    38     400.730 237.010 165.440  1.00  0.00            
ATOM   4490  CW  MOL    38     400.240 235.870 166.100  1.00  0.00            
ATOM   4491  CS  MOL    38     398.850 235.380 166.380  1.00  0.00            
ATOM   4492  CS  MOL    38     398.980 234.080 167.150  1.00  0.00            
ATOM   4493  CW  MOL    38     400.490 233.860 167.330  1.00  0.00            
ATOM   4494  NA  MOL    38     401.240 234.870 166.690  1.00  0.00            
ATOM   4495  CM  MOL    38     400.770 232.590 168.140  1.00  0.00            
ATOM   4496  CT  MOL    38     399.310 231.990 168.520  1.00  0.00            
ATOM   4497  C_2 MOL    38     398.150 232.950 167.860  1.00  0.00            
ATOM   4498  CW  MOL    38     401.990 232.230 168.490  1.00  0.00            
ATOM   4499  NA  MOL    38     403.250 232.950 168.150  1.00  0.00            
ATOM   4500  CW  MOL    38     404.410 232.370 168.730  1.00  0.00            
ATOM   4501  CT  MOL    38     403.940 231.100 169.640  1.00  0.00            
ATOM   4502  CT  MOL    38     402.340 230.990 169.420  1.00  0.00            
ATOM   4503  CM  MOL    38     405.790 232.740 168.580  1.00  0.00            
ATOM   4504  MG  MOL    38     403.320 234.670 166.760  1.00  0.00            
ATOM   4505  CT  MOL    38     409.030 233.790 168.150  1.00  0.00            
ATOM   4506  HC  MOL    38     408.990 233.630 169.220  1.00  0.00            
ATOM   4507  HC  MOL    38     409.370 232.900 167.650  1.00  0.00            
ATOM   4508  HC  MOL    38     409.830 234.500 168.000  1.00  0.00            
ATOM   4509  CT  MOL    38     408.810 236.470 166.290  1.00  0.00            
ATOM   4510  OH  MOL    38     409.690 236.900 167.320  1.00  0.00            
ATOM   4511  HO  MOL    38     409.700 236.210 167.990  1.00  0.00            
ATOM   4512  CT  MOL    38     409.620 235.790 165.160  1.00  0.00            
ATOM   4513  HC  MOL    38     410.140 234.930 165.560  1.00  0.00            
ATOM   4514  HC  MOL    38     410.320 236.510 164.700  1.00  0.00            
ATOM   4515  HC  MOL    38     408.950 235.410 164.340  1.00  0.00            
ATOM   4516  HC  MOL    38     408.370 237.390 165.870  1.00  0.00            
ATOM   4517  HC  MOL    38     406.490 237.460 165.180  1.00  0.00            
ATOM   4518  CT  MOL    38     401.700 239.510 163.650  1.00  0.00            
ATOM   4519  CT  MOL    38     401.140 240.590 164.600  1.00  0.00            
ATOM   4520  HC  MOL    38     401.950 241.230 164.940  1.00  0.00            
ATOM   4521  HC  MOL    38     400.690 240.150 165.470  1.00  0.00            
ATOM   4522  HC  MOL    38     400.390 241.210 164.160  1.00  0.00            
ATOM   4523  HC  MOL    38     402.250 239.990 162.840  1.00  0.00            
ATOM   4524  HC  MOL    38     400.910 238.990 163.140  1.00  0.00            
ATOM   4525  HC  MOL    38     399.950 237.640 165.050  1.00  0.00            
ATOM   4526  CT  MOL    38     397.570 236.100 166.020  1.00  0.00            
ATOM   4527  CT  MOL    38     396.280 235.620 166.690  1.00  0.00            
ATOM   4528  HC  MOL    38     396.380 235.610 167.780  1.00  0.00            
ATOM   4529  HC  MOL    38     396.050 234.610 166.340  1.00  0.00            
ATOM   4530  HC  MOL    38     395.470 236.250 166.400  1.00  0.00            
ATOM   4531  HC  MOL    38     397.470 236.010 164.930  1.00  0.00            
ATOM   4532  HC  MOL    38     397.650 237.160 166.260  1.00  0.00            
ATOM   4533  O_2 MOL    38     396.970 232.810 167.960  1.00  0.00            
ATOM   4534  HC  MOL    38     399.140 231.020 168.070  1.00  0.00            
ATOM   4535  HC  MOL    38     399.110 231.880 169.590  1.00  0.00            
ATOM   4536  CT  MOL    38     404.200 231.310 171.140  1.00  0.00            
ATOM   4537  HC  MOL    38     405.220 231.390 171.410  1.00  0.00            
ATOM   4538  HC  MOL    38     403.710 232.180 171.560  1.00  0.00            
ATOM   4539  HC  MOL    38     403.890 230.460 171.710  1.00  0.00            
ATOM   4540  HC  MOL    38     404.400 230.190 169.280  1.00  0.00            
ATOM   4541  CT  MOL    38     404.970 239.240 163.630  1.00  0.00            
ATOM   4542  HC  MOL    38     406.000 239.090 163.970  1.00  0.00            
ATOM   4543  HC  MOL    38     404.960 239.080 162.570  1.00  0.00            
ATOM   4544  HC  MOL    38     404.760 240.290 163.810  1.00  0.00            
ATOM   4545  CT  MOL    38     406.840 231.820 169.240  1.00  0.00            
ATOM   4546  HC  MOL    38     407.720 231.610 168.640  1.00  0.00            
ATOM   4547  HC  MOL    38     406.470 230.790 169.420  1.00  0.00            
ATOM   4548  HC  MOL    38     407.180 232.210 170.170  1.00  0.00            
ATOM   4549  HC  MOL    38     401.790 231.150 170.330  1.00  0.00            
ATOM   4550  CT  MOL    38     401.870 229.660 168.780  1.00  0.00            
ATOM   4551  CT  MOL    38     402.010 228.400 169.640  1.00  0.00            
ATOM   4552  HC  MOL    38     402.340 229.500 167.800  1.00  0.00            
ATOM   4553  HC  MOL    38     400.820 229.730 168.600  1.00  0.00            
ATOM   4554  HC  MOL    38     401.750 227.520 169.090  1.00  0.00            
ATOM   4555  HC  MOL    38     403.030 228.310 169.990  1.00  0.00            
ATOM   4556  C_2 MOL    38     401.070 228.340 170.820  1.00  0.00            
ATOM   4557  OS  MOL    38     401.740 228.630 171.970  1.00  0.00            
ATOM   4558  O_2 MOL    38     399.880 228.190 170.760  1.00  0.00            
ATOM   4559  CT  MOL    38     401.030 228.660 173.230  1.00  0.00            
ATOM   4560  CM  MOL    38     402.030 229.160 174.250  1.00  0.00            
ATOM   4561  CM  MOL    38     402.130 228.880 175.550  1.00  0.00            
ATOM   4562  CT  MOL    38     403.270 229.450 176.390  1.00  0.00            
ATOM   4563  HC  MOL    38     400.600 227.730 173.430  1.00  0.00            
ATOM   4564  HC  MOL    38     400.270 229.390 173.080  1.00  0.00            
ATOM   4565  HC  MOL    38     402.750 229.850 173.830  1.00  0.00            
ATOM   4566  HC  MOL    38     403.800 228.650 176.930  1.00  0.00            
ATOM   4567  HC  MOL    38     404.050 229.870 175.720  1.00  0.00            
ATOM   4568  CT  MOL    38     401.190 227.930 176.300  1.00  0.00            
ATOM   4569  HC  MOL    38     400.400 227.480 175.750  1.00  0.00            
ATOM   4570  HC  MOL    38     400.730 228.430 177.150  1.00  0.00            
ATOM   4571  HC  MOL    38     401.840 227.170 176.710  1.00  0.00            
ATOM   4572  CT  MOL    38     402.840 230.550 177.340  1.00  0.00            
ATOM   4573  CM  MOL    38     404.000 231.290 178.010  1.00  0.00            
ATOM   4574  CM  MOL    38     404.330 231.440 179.300  1.00  0.00            
ATOM   4575  CT  MOL    38     405.410 232.410 179.710  1.00  0.00            
ATOM   4576  HC  MOL    38     402.310 231.260 176.730  1.00  0.00            
ATOM   4577  HC  MOL    38     402.100 230.170 178.030  1.00  0.00            
ATOM   4578  HC  MOL    38     404.610 231.800 177.250  1.00  0.00            
ATOM   4579  HC  MOL    38     405.070 233.080 180.510  1.00  0.00            
ATOM   4580  HC  MOL    38     405.680 233.070 178.910  1.00  0.00            
ATOM   4581  CT  MOL    38     403.640 230.760 180.450  1.00  0.00            
ATOM   4582  HC  MOL    38     402.790 230.170 180.120  1.00  0.00            
ATOM   4583  HC  MOL    38     403.290 231.480 181.170  1.00  0.00            
ATOM   4584  HC  MOL    38     404.340 230.130 180.980  1.00  0.00            
ATOM   4585  CT  MOL    38     406.750 231.770 180.170  1.00  0.00            
ATOM   4586  CM  MOL    38     407.750 232.800 180.610  1.00  0.00            
ATOM   4587  CM  MOL    38     408.850 233.250 180.040  1.00  0.00            
ATOM   4588  CT  MOL    38     409.740 234.240 180.790  1.00  0.00            
ATOM   4589  HC  MOL    38     406.510 231.150 181.030  1.00  0.00            
ATOM   4590  HC  MOL    38     407.160 231.110 179.430  1.00  0.00            
ATOM   4591  HC  MOL    38     407.490 233.270 181.540  1.00  0.00            
ATOM   4592  HC  MOL    38     410.690 233.780 180.980  1.00  0.00            
ATOM   4593  HC  MOL    38     409.380 234.540 181.750  1.00  0.00            
ATOM   4594  HC  MOL    38     409.900 235.160 180.210  1.00  0.00            
ATOM   4595  CT  MOL    38     409.430 232.790 178.710  1.00  0.00            
ATOM   4596  HC  MOL    38     409.640 233.650 178.100  1.00  0.00            
ATOM   4597  HC  MOL    38     408.770 232.110 178.180  1.00  0.00            
ATOM   4598  HC  MOL    38     410.360 232.210 178.870  1.00  0.00            
ATOM   4599  CS  MOL    39     423.710 251.100 168.880  1.00  0.00            
ATOM   4600  CW  MOL    39     422.390 250.280 169.240  1.00  0.00            
ATOM   4601  NA  MOL    39     422.780 249.240 170.200  1.00  0.00            
ATOM   4602  CW  MOL    39     424.240 249.340 170.500  1.00  0.00            
ATOM   4603  CS  MOL    39     424.780 250.570 169.700  1.00  0.00            
ATOM   4604  CM  MOL    39     425.020 248.500 171.220  1.00  0.00            
ATOM   4605  CW  MOL    39     424.630 247.350 171.990  1.00  0.00            
ATOM   4606  CS  MOL    39     425.580 246.350 172.690  1.00  0.00            
ATOM   4607  CS  MOL    39     424.740 245.400 173.430  1.00  0.00            
ATOM   4608  CW  MOL    39     423.290 245.790 173.190  1.00  0.00            
ATOM   4609  NA  MOL    39     423.270 246.980 172.240  1.00  0.00            
ATOM   4610  CM  MOL    39     422.200 245.230 173.770  1.00  0.00            
ATOM   4611  CW  MOL    39     420.880 245.620 173.490  1.00  0.00            
ATOM   4612  CS  MOL    39     419.590 245.030 174.030  1.00  0.00            
ATOM   4613  CS  MOL    39     418.460 245.730 173.290  1.00  0.00            
ATOM   4614  CW  MOL    39     419.130 246.710 172.310  1.00  0.00            
ATOM   4615  NA  MOL    39     420.550 246.660 172.450  1.00  0.00            
ATOM   4616  CM  MOL    39     418.150 247.410 171.440  1.00  0.00            
ATOM   4617  CT  MOL    39     416.690 246.820 171.890  1.00  0.00            
ATOM   4618  C_2 MOL    39     416.940 245.780 173.110  1.00  0.00            
ATOM   4619  CW  MOL    39     418.500 248.250 170.450  1.00  0.00            
ATOM   4620  NA  MOL    39     419.920 248.700 170.170  1.00  0.00            
ATOM   4621  CW  MOL    39     419.980 249.680 169.160  1.00  0.00            
ATOM   4622  CT  MOL    39     418.520 249.850 168.470  1.00  0.00            
ATOM   4623  CT  MOL    39     417.520 248.920 169.420  1.00  0.00            
ATOM   4624  CM  MOL    39     421.080 250.430 168.740  1.00  0.00            
ATOM   4625  MG  MOL    39     421.670 247.770 171.100  1.00  0.00            
ATOM   4626  CT  MOL    39     423.910 252.210 167.840  1.00  0.00            
ATOM   4627  HC  MOL    39     423.420 252.010 166.870  1.00  0.00            
ATOM   4628  HC  MOL    39     423.520 253.150 168.230  1.00  0.00            
ATOM   4629  HC  MOL    39     424.950 252.340 167.600  1.00  0.00            
ATOM   4630  CT  MOL    39     426.240 251.050 169.790  1.00  0.00            
ATOM   4631  OH  MOL    39     426.370 252.460 169.840  1.00  0.00            
ATOM   4632  HO  MOL    39     426.040 252.810 169.020  1.00  0.00            
ATOM   4633  CT  MOL    39     427.170 250.410 168.780  1.00  0.00            
ATOM   4634  HC  MOL    39     427.000 250.850 167.800  1.00  0.00            
ATOM   4635  HC  MOL    39     427.040 249.320 168.760  1.00  0.00            
ATOM   4636  HC  MOL    39     428.220 250.580 169.010  1.00  0.00            
ATOM   4637  HC  MOL    39     426.660 250.750 170.730  1.00  0.00            
ATOM   4638  HC  MOL    39     426.070 248.660 171.210  1.00  0.00            
ATOM   4639  CT  MOL    39     425.190 244.180 174.230  1.00  0.00            
ATOM   4640  CT  MOL    39     425.370 244.390 175.700  1.00  0.00            
ATOM   4641  HC  MOL    39     426.170 245.100 175.900  1.00  0.00            
ATOM   4642  HC  MOL    39     425.650 243.440 176.180  1.00  0.00            
ATOM   4643  HC  MOL    39     424.440 244.760 176.150  1.00  0.00            
ATOM   4644  HC  MOL    39     426.120 243.820 173.830  1.00  0.00            
ATOM   4645  HC  MOL    39     424.480 243.360 174.100  1.00  0.00            
ATOM   4646  HC  MOL    39     422.360 244.450 174.470  1.00  0.00            
ATOM   4647  CT  MOL    39     419.450 243.860 174.960  1.00  0.00            
ATOM   4648  CT  MOL    39     418.730 244.130 176.290  1.00  0.00            
ATOM   4649  HC  MOL    39     419.280 244.870 176.810  1.00  0.00            
ATOM   4650  HC  MOL    39     418.690 243.240 176.920  1.00  0.00            
ATOM   4651  HC  MOL    39     417.690 244.470 176.170  1.00  0.00            
ATOM   4652  HC  MOL    39     420.440 243.400 175.130  1.00  0.00            
ATOM   4653  HC  MOL    39     418.840 243.120 174.460  1.00  0.00            
ATOM   4654  O_2 MOL    39     416.070 245.110 173.620  1.00  0.00            
ATOM   4655  HC  MOL    39     416.030 247.580 172.310  1.00  0.00            
ATOM   4656  HC  MOL    39     416.100 246.380 171.060  1.00  0.00            
ATOM   4657  CT  MOL    39     418.540 249.310 167.030  1.00  0.00            
ATOM   4658  HC  MOL    39     419.220 249.850 166.350  1.00  0.00            
ATOM   4659  HC  MOL    39     418.870 248.270 166.990  1.00  0.00            
ATOM   4660  HC  MOL    39     417.510 249.370 166.660  1.00  0.00            
ATOM   4661  HC  MOL    39     418.170 250.850 168.470  1.00  0.00            
ATOM   4662  CT  MOL    39     427.080 246.340 172.580  1.00  0.00            
ATOM   4663  HC  MOL    39     427.560 246.310 173.550  1.00  0.00            
ATOM   4664  HC  MOL    39     427.400 245.450 172.000  1.00  0.00            
ATOM   4665  HC  MOL    39     427.510 247.220 172.060  1.00  0.00            
ATOM   4666  CT  MOL    39     420.830 251.490 167.670  1.00  0.00            
ATOM   4667  HC  MOL    39     421.100 251.170 166.670  1.00  0.00            
ATOM   4668  HC  MOL    39     421.370 252.400 167.880  1.00  0.00            
ATOM   4669  HC  MOL    39     419.840 251.890 167.570  1.00  0.00            
ATOM   4670  HC  MOL    39     417.100 248.100 168.830  1.00  0.00            
ATOM   4671  CT  MOL    39     416.340 249.710 170.040  1.00  0.00            
ATOM   4672  CT  MOL    39     415.020 249.650 169.270  1.00  0.00            
ATOM   4673  HC  MOL    39     416.570 250.720 170.320  1.00  0.00            
ATOM   4674  HC  MOL    39     416.100 249.280 170.980  1.00  0.00            
ATOM   4675  HC  MOL    39     414.830 248.600 169.050  1.00  0.00            
ATOM   4676  HC  MOL    39     414.220 250.010 169.880  1.00  0.00            
ATOM   4677  C_2 MOL    39     414.960 250.440 167.980  1.00  0.00            
ATOM   4678  OS  MOL    39     414.100 249.900 167.120  1.00  0.00            
ATOM   4679  O_2 MOL    39     415.700 251.340 167.730  1.00  0.00            
ATOM   4680  CT  MOL    39     413.980 250.410 165.800  1.00  0.00            
ATOM   4681  CM  MOL    39     412.890 249.570 165.200  1.00  0.00            
ATOM   4682  CM  MOL    39     412.900 248.820 164.110  1.00  0.00            
ATOM   4683  CT  MOL    39     411.690 247.930 163.760  1.00  0.00            
ATOM   4684  HC  MOL    39     414.910 250.280 165.300  1.00  0.00            
ATOM   4685  HC  MOL    39     413.760 251.450 165.770  1.00  0.00            
ATOM   4686  HC  MOL    39     412.000 249.620 165.800  1.00  0.00            
ATOM   4687  HC  MOL    39     412.100 246.950 163.490  1.00  0.00            
ATOM   4688  HC  MOL    39     411.050 247.800 164.660  1.00  0.00            
ATOM   4689  CT  MOL    39     414.070 248.650 163.140  1.00  0.00            
ATOM   4690  HC  MOL    39     414.960 249.140 163.450  1.00  0.00            
ATOM   4691  HC  MOL    39     413.810 248.990 162.140  1.00  0.00            
ATOM   4692  HC  MOL    39     414.270 247.590 162.990  1.00  0.00            
ATOM   4693  CT  MOL    39     410.820 248.340 162.550  1.00  0.00            
ATOM   4694  CM  MOL    39     409.730 247.310 162.380  1.00  0.00            
ATOM   4695  CM  MOL    39     409.530 246.370 161.460  1.00  0.00            
ATOM   4696  CT  MOL    39     408.420 245.330 161.590  1.00  0.00            
ATOM   4697  HC  MOL    39     410.380 249.330 162.710  1.00  0.00            
ATOM   4698  HC  MOL    39     411.430 248.490 161.630  1.00  0.00            
ATOM   4699  HC  MOL    39     408.990 247.290 163.180  1.00  0.00            
ATOM   4700  HC  MOL    39     408.100 245.230 162.620  1.00  0.00            
ATOM   4701  HC  MOL    39     408.850 244.340 161.380  1.00  0.00            
ATOM   4702  CT  MOL    39     410.410 246.170 160.240  1.00  0.00            
ATOM   4703  HC  MOL    39     411.310 246.770 160.240  1.00  0.00            
ATOM   4704  HC  MOL    39     409.850 246.390 159.310  1.00  0.00            
ATOM   4705  HC  MOL    39     410.740 245.130 160.210  1.00  0.00            
ATOM   4706  CT  MOL    39     407.160 245.470 160.710  1.00  0.00            
ATOM   4707  CM  MOL    39     406.210 244.310 160.890  1.00  0.00            
ATOM   4708  CM  MOL    39     405.650 243.490 160.010  1.00  0.00            
ATOM   4709  CT  MOL    39     404.760 242.340 160.490  1.00  0.00            
ATOM   4710  HC  MOL    39     406.530 246.340 160.970  1.00  0.00            
ATOM   4711  HC  MOL    39     407.430 245.590 159.680  1.00  0.00            
ATOM   4712  HC  MOL    39     406.000 244.080 161.930  1.00  0.00            
ATOM   4713  HC  MOL    39     403.730 242.520 160.170  1.00  0.00            
ATOM   4714  HC  MOL    39     404.730 242.260 161.550  1.00  0.00            
ATOM   4715  HC  MOL    39     405.040 241.370 160.070  1.00  0.00            
ATOM   4716  CT  MOL    39     405.680 243.610 158.490  1.00  0.00            
ATOM   4717  HC  MOL    39     406.290 244.410 158.120  1.00  0.00            
ATOM   4718  HC  MOL    39     404.680 243.720 158.070  1.00  0.00            
ATOM   4719  HC  MOL    39     406.050 242.690 158.000  1.00  0.00            
ATOM   4720  CS  MOL    40     420.150 243.220 170.520  1.00  0.00            
ATOM   4721  CW  MOL    40     418.830 242.490 171.030  1.00  0.00            
ATOM   4722  NA  MOL    40     417.700 243.130 170.340  1.00  0.00            
ATOM   4723  CW  MOL    40     418.210 244.210 169.440  1.00  0.00            
ATOM   4724  CS  MOL    40     419.760 244.260 169.610  1.00  0.00            
ATOM   4725  CM  MOL    40     417.480 244.990 168.590  1.00  0.00            
ATOM   4726  CW  MOL    40     416.070 244.960 168.350  1.00  0.00            
ATOM   4727  CS  MOL    40     415.330 245.870 167.370  1.00  0.00            
ATOM   4728  CS  MOL    40     413.900 245.510 167.460  1.00  0.00            
ATOM   4729  CW  MOL    40     413.750 244.390 168.500  1.00  0.00            
ATOM   4730  NA  MOL    40     415.140 244.080 168.990  1.00  0.00            
ATOM   4731  CM  MOL    40     412.580 243.830 168.880  1.00  0.00            
ATOM   4732  CW  MOL    40     412.450 242.810 169.860  1.00  0.00            
ATOM   4733  CS  MOL    40     411.230 242.130 170.360  1.00  0.00            
ATOM   4734  CS  MOL    40     411.680 241.230 171.500  1.00  0.00            
ATOM   4735  CW  MOL    40     413.220 241.330 171.530  1.00  0.00            
ATOM   4736  NA  MOL    40     413.670 242.270 170.570  1.00  0.00            
ATOM   4737  CM  MOL    40     413.830 240.430 172.570  1.00  0.00            
ATOM   4738  CT  MOL    40     412.540 239.690 173.270  1.00  0.00            
ATOM   4739  C_2 MOL    40     411.170 240.270 172.580  1.00  0.00            
ATOM   4740  CW  MOL    40     415.150 240.390 172.790  1.00  0.00            
ATOM   4741  NA  MOL    40     416.170 241.200 172.050  1.00  0.00            
ATOM   4742  CW  MOL    40     417.480 240.940 172.490  1.00  0.00            
ATOM   4743  CT  MOL    40     417.420 239.880 173.700  1.00  0.00            
ATOM   4744  CT  MOL    40     415.860 239.480 173.870  1.00  0.00            
ATOM   4745  CM  MOL    40     418.720 241.480 172.000  1.00  0.00            
ATOM   4746  MG  MOL    40     415.720 242.550 170.360  1.00  0.00            
ATOM   4747  CT  MOL    40     421.600 242.920 170.890  1.00  0.00            
ATOM   4748  HC  MOL    40     421.800 242.960 171.970  1.00  0.00            
ATOM   4749  HC  MOL    40     421.930 241.970 170.520  1.00  0.00            
ATOM   4750  HC  MOL    40     422.240 243.650 170.420  1.00  0.00            
ATOM   4751  CT  MOL    40     420.640 245.280 168.880  1.00  0.00            
ATOM   4752  OH  MOL    40     421.500 245.930 169.800  1.00  0.00            
ATOM   4753  HO  MOL    40     421.550 245.380 170.570  1.00  0.00            
ATOM   4754  CT  MOL    40     421.430 244.670 167.720  1.00  0.00            
ATOM   4755  HC  MOL    40     422.120 243.870 168.050  1.00  0.00            
ATOM   4756  HC  MOL    40     422.010 245.410 167.180  1.00  0.00            
ATOM   4757  HC  MOL    40     420.740 244.210 167.000  1.00  0.00            
ATOM   4758  HC  MOL    40     420.080 246.060 168.380  1.00  0.00            
ATOM   4759  HC  MOL    40     418.010 245.700 168.040  1.00  0.00            
ATOM   4760  CT  MOL    40     412.770 246.150 166.710  1.00  0.00            
ATOM   4761  CT  MOL    40     411.990 247.150 167.540  1.00  0.00            
ATOM   4762  HC  MOL    40     412.630 247.970 167.830  1.00  0.00            
ATOM   4763  HC  MOL    40     411.600 246.690 168.440  1.00  0.00            
ATOM   4764  HC  MOL    40     411.160 247.580 167.020  1.00  0.00            
ATOM   4765  HC  MOL    40     413.150 246.610 165.810  1.00  0.00            
ATOM   4766  HC  MOL    40     412.090 245.370 166.400  1.00  0.00            
ATOM   4767  HC  MOL    40     411.700 244.190 168.420  1.00  0.00            
ATOM   4768  CT  MOL    40     409.830 242.290 169.830  1.00  0.00            
ATOM   4769  CT  MOL    40     409.090 243.400 170.560  1.00  0.00            
ATOM   4770  HC  MOL    40     409.640 244.320 170.530  1.00  0.00            
ATOM   4771  HC  MOL    40     408.900 243.110 171.570  1.00  0.00            
ATOM   4772  HC  MOL    40     408.130 243.570 170.040  1.00  0.00            
ATOM   4773  HC  MOL    40     409.330 241.320 169.980  1.00  0.00            
ATOM   4774  HC  MOL    40     409.830 242.490 168.780  1.00  0.00            
ATOM   4775  O_2 MOL    40     410.080 239.950 172.920  1.00  0.00            
ATOM   4776  HC  MOL    40     412.490 238.620 173.220  1.00  0.00            
ATOM   4777  HC  MOL    40     412.500 239.880 174.330  1.00  0.00            
ATOM   4778  CT  MOL    40     417.960 240.450 175.060  1.00  0.00            
ATOM   4779  HC  MOL    40     418.980 240.840 175.080  1.00  0.00            
ATOM   4780  HC  MOL    40     417.350 241.280 175.360  1.00  0.00            
ATOM   4781  HC  MOL    40     417.930 239.700 175.840  1.00  0.00            
ATOM   4782  HC  MOL    40     417.990 239.020 173.390  1.00  0.00            
ATOM   4783  CT  MOL    40     415.960 246.850 166.410  1.00  0.00            
ATOM   4784  HC  MOL    40     415.690 247.880 166.600  1.00  0.00            
ATOM   4785  HC  MOL    40     417.030 246.780 166.460  1.00  0.00            
ATOM   4786  HC  MOL    40     415.700 246.610 165.390  1.00  0.00            
ATOM   4787  CT  MOL    40     419.990 240.930 172.610  1.00  0.00            
ATOM   4788  HC  MOL    40     420.680 240.560 171.860  1.00  0.00            
ATOM   4789  HC  MOL    40     419.880 240.070 173.240  1.00  0.00            
ATOM   4790  HC  MOL    40     420.500 241.680 173.170  1.00  0.00            
ATOM   4791  HC  MOL    40     415.450 239.780 174.830  1.00  0.00            
ATOM   4792  CT  MOL    40     415.560 237.980 173.650  1.00  0.00            
ATOM   4793  CT  MOL    40     415.890 237.030 174.870  1.00  0.00            
ATOM   4794  HC  MOL    40     416.060 237.660 172.730  1.00  0.00            
ATOM   4795  HC  MOL    40     414.480 237.870 173.510  1.00  0.00            
ATOM   4796  HC  MOL    40     415.580 236.000 174.650  1.00  0.00            
ATOM   4797  HC  MOL    40     416.950 237.000 175.020  1.00  0.00            
ATOM   4798  C_2 MOL    40     415.270 237.470 176.210  1.00  0.00            
ATOM   4799  OS  MOL    40     416.120 238.190 176.950  1.00  0.00            
ATOM   4800  O_2 MOL    40     414.120 237.360 176.510  1.00  0.00            
ATOM   4801  CT  MOL    40     415.670 238.830 178.120  1.00  0.00            
ATOM   4802  CM  MOL    40     416.900 239.420 178.760  1.00  0.00            
ATOM   4803  CM  MOL    40     417.680 238.930 179.720  1.00  0.00            
ATOM   4804  CT  MOL    40     418.970 239.650 180.170  1.00  0.00            
ATOM   4805  HC  MOL    40     415.110 238.170 178.780  1.00  0.00            
ATOM   4806  HC  MOL    40     414.910 239.550 177.850  1.00  0.00            
ATOM   4807  HC  MOL    40     417.160 240.390 178.340  1.00  0.00            
ATOM   4808  HC  MOL    40     418.910 239.710 181.250  1.00  0.00            
ATOM   4809  HC  MOL    40     419.830 239.020 179.990  1.00  0.00            
ATOM   4810  CT  MOL    40     417.430 237.610 180.460  1.00  0.00            
ATOM   4811  HC  MOL    40     416.580 237.080 180.140  1.00  0.00            
ATOM   4812  HC  MOL    40     417.320 237.740 181.530  1.00  0.00            
ATOM   4813  HC  MOL    40     418.300 236.970 180.370  1.00  0.00            
ATOM   4814  CT  MOL    40     419.400 241.000 179.540  1.00  0.00            
ATOM   4815  CM  MOL    40     420.660 241.580 180.150  1.00  0.00            
ATOM   4816  CM  MOL    40     420.780 242.330 181.260  1.00  0.00            
ATOM   4817  CT  MOL    40     422.100 242.920 181.760  1.00  0.00            
ATOM   4818  HC  MOL    40     419.560 240.820 178.480  1.00  0.00            
ATOM   4819  HC  MOL    40     418.570 241.650 179.580  1.00  0.00            
ATOM   4820  HC  MOL    40     421.540 241.350 179.580  1.00  0.00            
ATOM   4821  HC  MOL    40     422.230 242.610 182.790  1.00  0.00            
ATOM   4822  HC  MOL    40     421.950 243.990 181.840  1.00  0.00            
ATOM   4823  CT  MOL    40     419.580 242.690 182.150  1.00  0.00            
ATOM   4824  HC  MOL    40     418.640 242.300 181.820  1.00  0.00            
ATOM   4825  HC  MOL    40     419.430 243.770 182.220  1.00  0.00            
ATOM   4826  HC  MOL    40     419.750 242.300 183.160  1.00  0.00            
ATOM   4827  CT  MOL    40     423.390 242.610 180.970  1.00  0.00            
ATOM   4828  CM  MOL    40     424.670 243.250 181.510  1.00  0.00            
ATOM   4829  CM  MOL    40     425.630 243.980 180.910  1.00  0.00            
ATOM   4830  CT  MOL    40     426.770 244.540 181.700  1.00  0.00            
ATOM   4831  HC  MOL    40     423.510 241.530 180.950  1.00  0.00            
ATOM   4832  HC  MOL    40     423.260 242.910 179.940  1.00  0.00            
ATOM   4833  HC  MOL    40     424.830 243.110 182.570  1.00  0.00            
ATOM   4834  HC  MOL    40     427.660 243.970 181.530  1.00  0.00            
ATOM   4835  HC  MOL    40     426.560 244.540 182.780  1.00  0.00            
ATOM   4836  HC  MOL    40     426.990 245.570 181.450  1.00  0.00            
ATOM   4837  CT  MOL    40     425.780 244.190 179.440  1.00  0.00            
ATOM   4838  HC  MOL    40     425.760 245.220 179.140  1.00  0.00            
ATOM   4839  HC  MOL    40     425.000 243.680 178.900  1.00  0.00            
ATOM   4840  HC  MOL    40     426.690 243.780 179.040  1.00  0.00            
ATOM   4841  CS  MOL    41     433.220 262.940 169.880  1.00  0.00            
ATOM   4842  CW  MOL    41     431.790 262.300 170.050  1.00  0.00            
ATOM   4843  NA  MOL    41     431.880 261.360 171.170  1.00  0.00            
ATOM   4844  CW  MOL    41     433.250 261.390 171.750  1.00  0.00            
ATOM   4845  CS  MOL    41     434.060 262.470 170.950  1.00  0.00            
ATOM   4846  CM  MOL    41     433.750 260.590 172.710  1.00  0.00            
ATOM   4847  CW  MOL    41     433.110 259.550 173.480  1.00  0.00            
ATOM   4848  CS  MOL    41     433.820 258.590 174.440  1.00  0.00            
ATOM   4849  CS  MOL    41     432.780 257.740 175.030  1.00  0.00            
ATOM   4850  CW  MOL    41     431.420 258.170 174.440  1.00  0.00            
ATOM   4851  NA  MOL    41     431.700 259.260 173.460  1.00  0.00            
ATOM   4852  CM  MOL    41     430.150 257.720 174.760  1.00  0.00            
ATOM   4853  CW  MOL    41     428.940 258.150 174.170  1.00  0.00            
ATOM   4854  CS  MOL    41     427.540 257.760 174.500  1.00  0.00            
ATOM   4855  CS  MOL    41     426.660 258.510 173.500  1.00  0.00            
ATOM   4856  CW  MOL    41     427.600 259.320 172.620  1.00  0.00            
ATOM   4857  NA  MOL    41     428.970 259.120 173.030  1.00  0.00            
ATOM   4858  CM  MOL    41     426.890 260.150 171.620  1.00  0.00            
ATOM   4859  CT  MOL    41     425.300 259.800 171.830  1.00  0.00            
ATOM   4860  C_2 MOL    41     425.190 258.710 173.070  1.00  0.00            
ATOM   4861  CW  MOL    41     427.520 260.990 170.800  1.00  0.00            
ATOM   4862  NA  MOL    41     429.010 261.180 170.690  1.00  0.00            
ATOM   4863  CW  MOL    41     429.350 261.940 169.560  1.00  0.00            
ATOM   4864  CT  MOL    41     428.030 262.340 168.730  1.00  0.00            
ATOM   4865  CT  MOL    41     426.790 261.820 169.690  1.00  0.00            
ATOM   4866  CM  MOL    41     430.650 262.510 169.250  1.00  0.00            
ATOM   4867  MG  MOL    41     430.460 260.070 171.920  1.00  0.00            
ATOM   4868  CT  MOL    41     433.710 263.860 168.770  1.00  0.00            
ATOM   4869  HC  MOL    41     433.690 263.360 167.780  1.00  0.00            
ATOM   4870  HC  MOL    41     433.170 264.780 168.690  1.00  0.00            
ATOM   4871  HC  MOL    41     434.700 264.150 168.980  1.00  0.00            
ATOM   4872  CT  MOL    41     435.510 262.880 171.320  1.00  0.00            
ATOM   4873  OH  MOL    41     435.660 264.310 171.280  1.00  0.00            
ATOM   4874  HO  MOL    41     436.610 264.420 171.290  1.00  0.00            
ATOM   4875  CT  MOL    41     436.490 262.170 170.420  1.00  0.00            
ATOM   4876  HC  MOL    41     436.500 262.560 169.400  1.00  0.00            
ATOM   4877  HC  MOL    41     436.310 261.100 170.360  1.00  0.00            
ATOM   4878  HC  MOL    41     437.510 262.330 170.820  1.00  0.00            
ATOM   4879  HC  MOL    41     435.680 262.580 172.340  1.00  0.00            
ATOM   4880  HC  MOL    41     434.810 260.630 172.930  1.00  0.00            
ATOM   4881  CT  MOL    41     432.940 256.670 176.060  1.00  0.00            
ATOM   4882  CT  MOL    41     432.810 257.170 177.520  1.00  0.00            
ATOM   4883  HC  MOL    41     433.540 257.920 177.740  1.00  0.00            
ATOM   4884  HC  MOL    41     432.910 256.380 178.260  1.00  0.00            
ATOM   4885  HC  MOL    41     431.850 257.620 177.690  1.00  0.00            
ATOM   4886  HC  MOL    41     433.910 256.230 175.940  1.00  0.00            
ATOM   4887  HC  MOL    41     432.210 255.900 175.840  1.00  0.00            
ATOM   4888  HC  MOL    41     430.050 257.030 175.600  1.00  0.00            
ATOM   4889  CT  MOL    41     427.020 256.860 175.600  1.00  0.00            
ATOM   4890  CT  MOL    41     427.130 255.360 175.230  1.00  0.00            
ATOM   4891  HC  MOL    41     426.610 255.110 174.300  1.00  0.00            
ATOM   4892  HC  MOL    41     426.620 254.750 176.030  1.00  0.00            
ATOM   4893  HC  MOL    41     428.180 255.070 175.160  1.00  0.00            
ATOM   4894  HC  MOL    41     425.990 257.190 175.810  1.00  0.00            
ATOM   4895  HC  MOL    41     427.550 257.020 176.520  1.00  0.00            
ATOM   4896  O_2 MOL    41     424.150 258.290 173.490  1.00  0.00            
ATOM   4897  HC  MOL    41     424.780 260.700 172.090  1.00  0.00            
ATOM   4898  HC  MOL    41     424.760 259.360 170.970  1.00  0.00            
ATOM   4899  CT  MOL    41     428.040 261.570 167.360  1.00  0.00            
ATOM   4900  HC  MOL    41     428.890 261.770 166.750  1.00  0.00            
ATOM   4901  HC  MOL    41     428.050 260.520 167.540  1.00  0.00            
ATOM   4902  HC  MOL    41     427.140 261.780 166.820  1.00  0.00            
ATOM   4903  HC  MOL    41     427.950 263.400 168.570  1.00  0.00            
ATOM   4904  CT  MOL    41     435.310 258.580 174.770  1.00  0.00            
ATOM   4905  HC  MOL    41     435.830 257.940 174.080  1.00  0.00            
ATOM   4906  HC  MOL    41     435.810 259.560 174.790  1.00  0.00            
ATOM   4907  HC  MOL    41     435.510 258.130 175.740  1.00  0.00            
ATOM   4908  CT  MOL    41     430.770 263.490 168.070  1.00  0.00            
ATOM   4909  HC  MOL    41     431.520 263.230 167.380  1.00  0.00            
ATOM   4910  HC  MOL    41     430.950 264.520 168.390  1.00  0.00            
ATOM   4911  HC  MOL    41     429.900 263.540 167.440  1.00  0.00            
ATOM   4912  HC  MOL    41     426.140 261.200 169.120  1.00  0.00            
ATOM   4913  CT  MOL    41     425.940 263.010 170.310  1.00  0.00            
ATOM   4914  CT  MOL    41     424.580 263.290 169.650  1.00  0.00            
ATOM   4915  HC  MOL    41     426.510 263.920 170.380  1.00  0.00            
ATOM   4916  HC  MOL    41     425.690 262.700 171.330  1.00  0.00            
ATOM   4917  HC  MOL    41     423.910 262.440 169.700  1.00  0.00            
ATOM   4918  HC  MOL    41     424.100 264.130 170.150  1.00  0.00            
ATOM   4919  C_2 MOL    41     424.620 263.740 168.190  1.00  0.00            
ATOM   4920  OS  MOL    41     423.670 263.140 167.440  1.00  0.00            
ATOM   4921  O_2 MOL    41     425.560 264.230 167.690  1.00  0.00            
ATOM   4922  CT  MOL    41     423.660 263.120 166.000  1.00  0.00            
ATOM   4923  CM  MOL    41     422.610 262.090 165.640  1.00  0.00            
ATOM   4924  CM  MOL    41     422.730 260.820 165.280  1.00  0.00            
ATOM   4925  CT  MOL    41     421.500 259.920 165.110  1.00  0.00            
ATOM   4926  HC  MOL    41     424.650 262.940 165.640  1.00  0.00            
ATOM   4927  HC  MOL    41     423.370 264.120 165.650  1.00  0.00            
ATOM   4928  HC  MOL    41     421.600 262.450 165.770  1.00  0.00            
ATOM   4929  HC  MOL    41     421.550 259.190 165.930  1.00  0.00            
ATOM   4930  HC  MOL    41     420.570 260.470 165.220  1.00  0.00            
ATOM   4931  CT  MOL    41     424.030 260.060 165.210  1.00  0.00            
ATOM   4932  HC  MOL    41     424.870 260.660 165.580  1.00  0.00            
ATOM   4933  HC  MOL    41     424.310 259.740 164.200  1.00  0.00            
ATOM   4934  HC  MOL    41     424.020 259.220 165.890  1.00  0.00            
ATOM   4935  CT  MOL    41     421.420 259.050 163.810  1.00  0.00            
ATOM   4936  CM  MOL    41     420.340 258.030 163.930  1.00  0.00            
ATOM   4937  CM  MOL    41     420.400 256.710 164.150  1.00  0.00            
ATOM   4938  CT  MOL    41     419.110 255.890 164.230  1.00  0.00            
ATOM   4939  HC  MOL    41     421.230 259.720 162.980  1.00  0.00            
ATOM   4940  HC  MOL    41     422.360 258.580 163.590  1.00  0.00            
ATOM   4941  HC  MOL    41     419.360 258.490 163.860  1.00  0.00            
ATOM   4942  HC  MOL    41     418.280 256.570 164.080  1.00  0.00            
ATOM   4943  HC  MOL    41     418.970 255.570 165.230  1.00  0.00            
ATOM   4944  CT  MOL    41     421.690 255.940 164.400  1.00  0.00            
ATOM   4945  HC  MOL    41     422.560 256.540 164.450  1.00  0.00            
ATOM   4946  HC  MOL    41     421.870 255.180 163.650  1.00  0.00            
ATOM   4947  HC  MOL    41     421.610 255.400 165.350  1.00  0.00            
ATOM   4948  CT  MOL    41     418.960 254.710 163.220  1.00  0.00            
ATOM   4949  CM  MOL    41     417.560 254.140 163.170  1.00  0.00            
ATOM   4950  CM  MOL    41     417.100 252.990 163.640  1.00  0.00            
ATOM   4951  CT  MOL    41     415.650 252.580 163.380  1.00  0.00            
ATOM   4952  HC  MOL    41     419.210 255.080 162.230  1.00  0.00            
ATOM   4953  HC  MOL    41     419.750 253.960 163.420  1.00  0.00            
ATOM   4954  HC  MOL    41     416.890 254.790 162.600  1.00  0.00            
ATOM   4955  HC  MOL    41     415.580 251.600 162.940  1.00  0.00            
ATOM   4956  HC  MOL    41     415.130 253.280 162.740  1.00  0.00            
ATOM   4957  HC  MOL    41     415.060 252.550 164.280  1.00  0.00            
ATOM   4958  CT  MOL    41     417.880 251.990 164.440  1.00  0.00            
ATOM   4959  HC  MOL    41     418.870 252.360 164.690  1.00  0.00            
ATOM   4960  HC  MOL    41     418.060 251.080 163.860  1.00  0.00            
ATOM   4961  HC  MOL    41     417.390 251.690 165.360  1.00  0.00            
ATOM   4962  CS  MOL    42     430.340 254.950 172.060  1.00  0.00            
ATOM   4963  CW  MOL    42     429.110 254.050 172.500  1.00  0.00            
ATOM   4964  NA  MOL    42     427.940 254.490 171.730  1.00  0.00            
ATOM   4965  CW  MOL    42     428.370 255.570 170.800  1.00  0.00            
ATOM   4966  CS  MOL    42     429.900 255.830 171.010  1.00  0.00            
ATOM   4967  CM  MOL    42     427.570 256.290 170.000  1.00  0.00            
ATOM   4968  CW  MOL    42     426.170 256.170 169.770  1.00  0.00            
ATOM   4969  CS  MOL    42     425.390 257.090 168.830  1.00  0.00            
ATOM   4970  CS  MOL    42     424.000 256.650 168.810  1.00  0.00            
ATOM   4971  CW  MOL    42     423.880 255.490 169.790  1.00  0.00            
ATOM   4972  NA  MOL    42     425.270 255.200 170.330  1.00  0.00            
ATOM   4973  CM  MOL    42     422.780 254.800 170.120  1.00  0.00            
ATOM   4974  CW  MOL    42     422.770 253.710 171.000  1.00  0.00            
ATOM   4975  CS  MOL    42     421.600 252.880 171.460  1.00  0.00            
ATOM   4976  CS  MOL    42     422.130 251.910 172.510  1.00  0.00            
ATOM   4977  CW  MOL    42     423.640 252.200 172.600  1.00  0.00            
ATOM   4978  NA  MOL    42     424.020 253.240 171.730  1.00  0.00            
ATOM   4979  CM  MOL    42     424.320 251.360 173.630  1.00  0.00            
ATOM   4980  CT  MOL    42     423.130 250.450 174.310  1.00  0.00            
ATOM   4981  C_2 MOL    42     421.720 250.820 173.530  1.00  0.00            
ATOM   4982  CW  MOL    42     425.610 251.420 173.910  1.00  0.00            
ATOM   4983  NA  MOL    42     426.590 252.370 173.270  1.00  0.00            
ATOM   4984  CW  MOL    42     427.870 252.320 173.890  1.00  0.00            
ATOM   4985  CT  MOL    42     427.850 251.250 175.090  1.00  0.00            
ATOM   4986  CT  MOL    42     426.320 250.590 175.040  1.00  0.00            
ATOM   4987  CM  MOL    42     429.070 253.060 173.490  1.00  0.00            
ATOM   4988  MG  MOL    42     426.050 253.680 171.600  1.00  0.00            
ATOM   4989  CT  MOL    42     431.740 254.950 172.620  1.00  0.00            
ATOM   4990  HC  MOL    42     431.790 254.850 173.710  1.00  0.00            
ATOM   4991  HC  MOL    42     432.360 254.180 172.200  1.00  0.00            
ATOM   4992  HC  MOL    42     432.210 255.870 172.440  1.00  0.00            
ATOM   4993  CT  MOL    42     430.590 256.950 170.210  1.00  0.00            
ATOM   4994  OH  MOL    42     430.260 258.210 170.730  1.00  0.00            
ATOM   4995  HO  MOL    42     429.430 258.090 171.200  1.00  0.00            
ATOM   4996  CT  MOL    42     432.090 256.800 169.940  1.00  0.00            
ATOM   4997  HC  MOL    42     432.670 257.050 170.810  1.00  0.00            
ATOM   4998  HC  MOL    42     432.460 257.400 169.130  1.00  0.00            
ATOM   4999  HC  MOL    42     432.340 255.770 169.690  1.00  0.00            
ATOM   5000  HC  MOL    42     430.160 256.930 169.220  1.00  0.00            
ATOM   5001  HC  MOL    42     428.030 257.080 169.460  1.00  0.00            
ATOM   5002  CT  MOL    42     422.840 257.280 168.070  1.00  0.00            
ATOM   5003  CT  MOL    42     422.350 258.560 168.740  1.00  0.00            
ATOM   5004  HC  MOL    42     423.170 259.240 168.900  1.00  0.00            
ATOM   5005  HC  MOL    42     421.950 258.320 169.720  1.00  0.00            
ATOM   5006  HC  MOL    42     421.550 259.060 168.210  1.00  0.00            
ATOM   5007  HC  MOL    42     423.140 257.540 167.070  1.00  0.00            
ATOM   5008  HC  MOL    42     422.010 256.590 167.970  1.00  0.00            
ATOM   5009  HC  MOL    42     421.860 255.090 169.690  1.00  0.00            
ATOM   5010  CT  MOL    42     420.170 252.970 171.010  1.00  0.00            
ATOM   5011  CT  MOL    42     419.310 253.920 171.910  1.00  0.00            
ATOM   5012  HC  MOL    42     419.810 254.860 172.020  1.00  0.00            
ATOM   5013  HC  MOL    42     419.200 253.440 172.880  1.00  0.00            
ATOM   5014  HC  MOL    42     418.320 254.050 171.480  1.00  0.00            
ATOM   5015  HC  MOL    42     419.700 251.980 170.970  1.00  0.00            
ATOM   5016  HC  MOL    42     420.170 253.290 169.980  1.00  0.00            
ATOM   5017  O_2 MOL    42     420.650 250.370 173.830  1.00  0.00            
ATOM   5018  HC  MOL    42     423.270 249.380 174.200  1.00  0.00            
ATOM   5019  HC  MOL    42     423.020 250.600 175.370  1.00  0.00            
ATOM   5020  CT  MOL    42     428.020 251.980 176.460  1.00  0.00            
ATOM   5021  HC  MOL    42     428.990 252.440 176.530  1.00  0.00            
ATOM   5022  HC  MOL    42     427.270 252.780 176.590  1.00  0.00            
ATOM   5023  HC  MOL    42     427.920 251.290 177.280  1.00  0.00            
ATOM   5024  HC  MOL    42     428.610 250.520 174.940  1.00  0.00            
ATOM   5025  CT  MOL    42     425.980 258.310 168.140  1.00  0.00            
ATOM   5026  HC  MOL    42     426.490 258.100 167.200  1.00  0.00            
ATOM   5027  HC  MOL    42     425.230 259.020 167.890  1.00  0.00            
ATOM   5028  HC  MOL    42     426.680 258.880 168.760  1.00  0.00            
ATOM   5029  CT  MOL    42     430.370 252.700 174.250  1.00  0.00            
ATOM   5030  HC  MOL    42     431.220 252.680 173.580  1.00  0.00            
ATOM   5031  HC  MOL    42     430.430 251.750 174.740  1.00  0.00            
ATOM   5032  HC  MOL    42     430.610 253.430 175.020  1.00  0.00            
ATOM   5033  HC  MOL    42     425.770 250.730 175.960  1.00  0.00            
ATOM   5034  CT  MOL    42     426.390 249.070 174.750  1.00  0.00            
ATOM   5035  CT  MOL    42     426.670 248.180 176.000  1.00  0.00            
ATOM   5036  HC  MOL    42     427.100 248.890 173.940  1.00  0.00            
ATOM   5037  HC  MOL    42     425.450 248.700 174.340  1.00  0.00            
ATOM   5038  HC  MOL    42     427.130 247.280 175.630  1.00  0.00            
ATOM   5039  HC  MOL    42     427.380 248.730 176.610  1.00  0.00            
ATOM   5040  C_2 MOL    42     425.480 247.830 176.850  1.00  0.00            
ATOM   5041  OS  MOL    42     425.660 248.120 178.160  1.00  0.00            
ATOM   5042  O_2 MOL    42     424.410 247.550 176.410  1.00  0.00            
ATOM   5043  CT  MOL    42     424.530 248.090 179.040  1.00  0.00            
ATOM   5044  CM  MOL    42     424.930 248.800 180.300  1.00  0.00            
ATOM   5045  CM  MOL    42     424.770 248.470 181.570  1.00  0.00            
ATOM   5046  CT  MOL    42     425.270 249.340 182.730  1.00  0.00            
ATOM   5047  HC  MOL    42     424.200 247.060 179.100  1.00  0.00            
ATOM   5048  HC  MOL    42     423.750 248.620 178.560  1.00  0.00            
ATOM   5049  HC  MOL    42     425.390 249.740 180.020  1.00  0.00            
ATOM   5050  HC  MOL    42     424.370 249.600 183.340  1.00  0.00            
ATOM   5051  HC  MOL    42     425.920 248.820 183.400  1.00  0.00            
ATOM   5052  CT  MOL    42     424.220 247.140 182.050  1.00  0.00            
ATOM   5053  HC  MOL    42     423.870 246.570 181.220  1.00  0.00            
ATOM   5054  HC  MOL    42     423.380 247.250 182.760  1.00  0.00            
ATOM   5055  HC  MOL    42     425.000 246.560 182.510  1.00  0.00            
ATOM   5056  CT  MOL    42     425.970 250.670 182.340  1.00  0.00            
ATOM   5057  CM  MOL    42     426.470 251.460 183.510  1.00  0.00            
ATOM   5058  CM  MOL    42     425.950 252.560 184.060  1.00  0.00            
ATOM   5059  CT  MOL    42     426.640 253.340 185.170  1.00  0.00            
ATOM   5060  HC  MOL    42     426.810 250.480 181.680  1.00  0.00            
ATOM   5061  HC  MOL    42     425.290 251.240 181.740  1.00  0.00
[truncated: 16,806,393 more chars]
